# Supplementary material for: Misclassification in memory modification in AppNL-G-F knock-in mouse model of Alzheimer’s disease
Source: eLife. 2025 Nov 4;14:RP105347. doi: 10.7554/eLife.105347 (PMC12585179; doi:10.7554/eLife.105347)
Supplement: Appendix 1—figure 1—source data 1. [file elife-105347-app1-fig1-data1.xlsx]

## Sheet: Appendix 1—figure 1
	Rescorla-Wagner model								Latent state model
	Appendix 1—figure 1A		Appendix 1—figure 1B		Appendix 1—figure 1C		Appendix 1—figure 1D		Appendix 1—figure 1E		Appendix 1—figure 1F		Appendix 1—figure 1G		Appendix 1—figure 1H
Trial	6 m.o. Control_obs	6 m.o. Control_sim	6 m.o. AppNL-G-F_obs	6 m.o. AppNL-G-F_sim	12 m.o. Control_obs	12 m.o. Control_sim	12 m.o. AppNL-G-F_obs	12 m.o. AppNL-G-F_sim	6 m.o. Control_obs	6 m.o. Control_sim	6 m.o. AppNL-G-F_obs	6 m.o. AppNL-G-F_sim	12 m.o. Control_obs	12 m.o. Control_sim	12 m.o. AppNL-G-F_obs	12 m.o. AppNL-G-F_sim
1	0	0	0	0	0	0	0	0	0	0	0	0	0	0	0	0
2	0.0890688	0.346597	0.139423	0.355835	0	0.360134	0.0204604	0.361002	0.0890688	0.172158	0.139423	0.142291	0	0.350596	0.0204604	0.932589
3	0.438596	0.679735	0.338942	0.688609	0.330409	0.692676	0.383632	0.693492	0.438596	0.34197	0.338942	0.272051	0.330409	0.784063	0.383632	1
4	0.94332	1	1	1	0.976608	1	1	1	0.94332	1	1	1	0.976608	0.990675	1	0.865262
5	0.877193	0.961354	0.721154	0.935715	0.755848	0.924118	0.851662	0.921803	0.877193	0.952692	0.721154	0.5226	0.755848	0.741582	0.851662	0.5581
6	1	0.924385	0.819712	0.87607	0.902047	0.8547	0.723785	0.85047	1	0.941234	0.819712	0.481958	0.902047	0.503371	0.723785	0.407688
7	0.820513	0.889012	0.819712	0.820689	0.538012	0.791129	0.616368	0.785326	0.820513	0.929929	0.819712	0.444516	0.538012	0.353613	0.616368	0.379944
8	0.877193	0.855158	0.639423	0.769231	0.440058	0.732852	0.639386	0.725768	0.877193	0.918774	0.639423	0.410005	0.440058	0.270511	0.639386	0.363535
9	1	0.822749	0.721154	0.721384	0.548246	0.679374	0.404092	0.671259	1	0.907766	0.721154	0.378185	0.548246	0.226701	0.404092	0.348008
10	0.910931	0.791716	0.620192	0.676863	0.353801	0.630253	0.424552	0.621318	0.910931	0.896902	0.620192	0.348841	0.353801	0.20214	0.424552	0.332221
11	0.831309	0.761994	0.560096	0.635409	0.232456	0.585087	0.383632	0.575515	0.831309	0.88618	0.560096	0.321777	0.232456	0.185928	0.383632	0.316118
12	0.774629	0.733521	0.540865	0.596784	0.390351	0.54352	0.404092	0.533463	0.774629	0.875597	0.540865	0.296814	0.390351	0.173373	0.404092	0.299862
13	0.582996	0.706238	0.5	0.560771	0.318713	0.505229	0.296675	0.494818	0.582996	0.865152	0.5	0.273789	0.318713	0.16279	0.296675	0.28366
14	0.639676	0.680088	0.600962	0.527172	0.342105	0.469923	0.340153	0.459268	0.639676	0.85484	0.600962	0.252551	0.342105	0.153584	0.340153	0.267699
15	0.595142	0.655019	0.439904	0.495803	0.232456	0.43734	0.511509	0.426536	0.595142	0.844662	0.439904	0.23296	0.232456	0.14547	0.511509	0.252131
16	0.62888	0.630981	0.459135	0.466499	0.342105	0.407245	0.340153	0.396369	0.62888	0.834613	0.459135	0.214889	0.342105	0.138246	0.340153	0.237067
17	0.538462	0.607926	0.360577	0.439107	0.342105	0.379424	0.360614	0.368542	0.538462	0.824692	0.360577	0.19822	0.342105	0.131735	0.360614	0.222585
18	0.527665	0.585809	0.459135	0.413487	0.317251	0.353684	0.340153	0.342853	0.527665	0.814898	0.459135	0.182844	0.317251	0.125785	0.340153	0.208735
19	0.5722	0.564587	0.379808	0.389509	0.207602	0.329851	0.319693	0.319116	0.5722	0.805227	0.379808	0.168661	0.207602	0.120264	0.319693	0.195544
20	0.483131	0.544218	0.420673	0.367056	0.292398	0.307767	0.340153	0.297166	0.483131	0.795678	0.420673	0.155578	0.292398	0.115074	0.340153	0.183026
21	0.449393	0.524666	0.439904	0.346019	0.232456	0.287288	0.232737	0.276853	0.449393	0.786249	0.439904	0.14351	0.232456	0.110148	0.232737	0.171179
22	0.426451	0.505892	0.5	0.326298	0.29386	0.268285	0.212276	0.25804	0.426451	0.776939	0.5	0.132378	0.29386	0.105448	0.212276	0.159996
23	0.426451	0.487862	0.21875	0.307801	0.195906	0.250638	0.296675	0.240605	0.426451	0.767745	0.21875	0.12211	0.195906	0.100953	0.296675	0.149459
24	0.470985	0.470542	0.300481	0.290443	0.403509	0.234241	0.424552	0.224436	0.470985	0.732065	0.300481	0.0640058	0.403509	0.544515	0.424552	0.0803796
25	0.651822	0.453902	0.360577	0.274145	0.488304	0.218995	0.468031	0.20943	0.651822	0.723413	0.360577	0.0590409	0.488304	0.0682191	0.468031	0.0742466
26	0.392713	0.437911	0.259615	0.258837	0.5	0.204811	0.360614	0.195496	0.392713	0.714868	0.259615	0.0544611	0.5	0.0653124	0.360614	0.0690586
27	0.415655	0.422541	0.180288	0.24445	0.353801	0.191607	0.212276	0.18255	0.415655	0.706428	0.180288	0.0502366	0.353801	0.0625297	0.212276	0.0642877
28	0.303644	0.407765	0.240385	0.230923	0.328947	0.179309	0.255754	0.170513	0.303644	0.698093	0.240385	0.0463398	0.328947	0.0598656	0.255754	0.0598521
29	0.325236	0.393556	0.158654	0.218199	0.25731	0.167849	0.319693	0.159318	0.325236	0.68986	0.158654	0.0427452	0.25731	0.057315	0.319693	0.0557218
30	0.325236	0.379891	0.21875	0.206226	0.207602	0.157164	0.104859	0.148898	0.325236	0.681729	0.21875	0.0394295	0.207602	0.0548731	0.104859	0.0518744
31	0.392713	0.366746	0.0600962	0.194955	0.195906	0.147198	0.084399	0.139197	0.392713	0.673697	0.0600962	0.036371	0.195906	0.0525353	0.084399	0.0482906
32	0.280702	0.354099	0.0192308	0.184341	0.159357	0.137896	0.212276	0.130159	0.280702	0.665763	0.0192308	0.0335497	0.159357	0.050297	0.212276	0.0449524
33	0.269906	0.341929	0.120192	0.17434	0.280702	0.129213	0.148338	0.121737	0.269906	0.657926	0.120192	0.0309473	0.280702	0.0481542	0.148338	0.0418433
34	0.336032	0.330216	0.158654	0.164915	0.561404	0.121102	0.319693	0.113884	0.336032	0.627503	0.158654	0.0162215	0.561404	0.523569	0.319693	0.0219421
35	0.221323	0.0405038	0.298077	0.0102114	0.359649	0.00534783	0.219949	0.00469134	0.221323	0.0230192	0.298077	0.00032703	0.359649	0.0199212	0.219949	0.000441142
36	0.820513	0.415521	0.680288	0.256668	1	0.215781	0.468031	0.209127	0.820513	0.625038	0.680288	0.903042	1	1	0.468031	0.421033
