# Supplementary material for: Misclassification in memory modification in AppNL-G-F knock-in mouse model of Alzheimer’s disease
Source: eLife. 2025 Nov 4;14:RP105347. doi: 10.7554/eLife.105347 (PMC12585179; doi:10.7554/eLife.105347)
Supplement: Appendix 1—figure 2—source data 1. [file elife-105347-app1-fig2-data1.xlsx]

## Sheet: Appendix 1—figure 2
		Accepted = 0, Anomaly = 1						Accepted = 0, Anomaly = 1
Genotype	Age	Rescorla-Wagner model	Latent cause model	Latent state model		Genotype	Age	Rescorla-Wagner model	Latent cause model	Latent state model
AppNL-G-F	6	1	0	0		Control	12	1	0	1
AppNL-G-F	6	1	1	0		Control	12	1	0	1
AppNL-G-F	6	1	1	1		Control	12	1	0	0
AppNL-G-F	6	1	0	0		Control	12	1	1	1
AppNL-G-F	6	1	1	1		Control	12	1	0	0
AppNL-G-F	6	1	1	1		Control	12	1	1	1
AppNL-G-F	6	1	1	1		Control	12	1	0	0
AppNL-G-F	6	1	0	0		Control	12	1	0	1
AppNL-G-F	6	1	1	0		Control	12	1	0	0
AppNL-G-F	6	1	0	0		AppNL-G-F	12	1	0	0
AppNL-G-F	6	1	0	0		AppNL-G-F	12	1	0	0
AppNL-G-F	6	1	0	0		AppNL-G-F	12	1	0	0
AppNL-G-F	6	1	0	0		AppNL-G-F	12	1	0	0
Control	6	1	1	1		AppNL-G-F	12	1	0	1
Control	6	1	1	1		AppNL-G-F	12	1	0	1
Control	6	1	0	1		AppNL-G-F	12	1	1	1
Control	6	1	0	0		AppNL-G-F	12	1	1	1
AppNL-G-F	6	1	1	1		AppNL-G-F	12	1	1	1
AppNL-G-F	6	0	0	0		AppNL-G-F	12	1	0	1
AppNL-G-F	6	1	0	1		AppNL-G-F	12	1	1	1
AppNL-G-F	6	1	1	1		AppNL-G-F	12	1	0	1
Control	6	1	0	1		AppNL-G-F	12	1	0	0
Control	6	0	0	0		AppNL-G-F	12	1	1	1
Control	6	1	1	1		AppNL-G-F	12	1	0	1
Control	6	1	1	0		Control	12	1	0	1
Control	6	1	1	1		Control	12	1	0	1
Control	6	1	0	1		Control	12	1	0	1
Control	6	1	1	1		Control	12	1	1	1
Control	6	1	1	1		Control	12	1	0	0
AppNL-G-F	6	1	1	0		Control	12	1	0	1
AppNL-G-F	6	1	1	1		Control	12	1	0	0
AppNL-G-F	6	1	0	0		Control	12	1	0	0
AppNL-G-F	6	0	0	1		AppNL-G-F	12	0	0	1
Control	6	1	0	1		AppNL-G-F	12	1	1	0
Control	6	1	0	0		AppNL-G-F	12	1	0	0
Control	6	1	0	1		AppNL-G-F	12	1	0	0
Control	6	1	1	1		Control	12	0	0	0
Control	6	1	0	1		AppNL-G-F	12	1	1	1
Control	6	1	0	1		Control	12	1	1	0
Control	6	1	0	0		Control	12	1	0	0
Control	6	1	0	1		Control	12	1	0	1
Control	6	1	0	1		Control	12	1	0	1
Control	6	1	0	1		Control	12	1	0	1
Control	6	0	1	0		Control	12	1	0	1
Control	6	1	0	1		AppNL-G-F	12	1	0	0
AppNL-G-F	6	1	1	1		AppNL-G-F	12	1	0	0
AppNL-G-F	6	1	1	1		AppNL-G-F	12	1	0	1
AppNL-G-F	6	1	1	1		AppNL-G-F	12	1	0	1
AppNL-G-F	6	1	0	0		AppNL-G-F	12	1	0	0
