# Supplementary material for: Misclassification in memory modification in AppNL-G-F knock-in mouse model of Alzheimer’s disease
Source: eLife. 2025 Nov 4;14:RP105347. doi: 10.7554/eLife.105347 (PMC12585179; doi:10.7554/eLife.105347)
Supplement: Appendix 1—figure 3—source data 1. [file elife-105347-app1-fig3-data1.xlsx]

## Sheet: Appendix 1—figure 3A
		Squared prediction error across trials (Rescorla-Wagner model)
Genotype	Age	1	2	3	4	5	6	7	8	9	10	11	12	13	14	15	16	17	18	19	20	21	22	23	24	25	26	27	28	29	30	31	32	33	34	35	36
AppNL-G-F	6	0	0.000645255	0.00734863	0	0.156231	0.0345425	0.145242	0.0243509	0.0921185	0.00968175	0.000187396	0.00741781	0.0175695	0.00112067	0.00873533	0.0283757	4.16118e-06	0.0890557	0.00744184	0.025811	0.143831	0.202586	0.000745414	0.00854472	1.65478e-05	0.000158785	0.00247975	0.000919947	0.0267683	0.051293	0.0535413	8.88159e-05	0.00433363	0.000991896	0.0574742	0.0578946
AppNL-G-F	6	0	0.0535874	0.0561681	0.0294214	0.426548	0.0211121	0.00278597	0.00278152	0.00855537	0.0251395	0.0161573	0.0101973	0.00223284	0.00024017	0.0276651	5.75794e-05	0.0491152	0.0361209	0.0133271	0.00634202	0.106783	0.00101676	0.00131261	0.11353	0.00900577	0.00807987	0.0112029	0.0115065	0.00107826	0.0100251	0.00227645	0.00271786	0.00314005	5.68996e-05	0.0281884	0.0338102
AppNL-G-F	6	0.00933784	0.0211297	0.0471377	0.00233446	0.168701	0.00626619	0.0316426	0.124209	0.0572227	0.0151688	0.262792	0.00241434	0.0128211	0.00287431	0.00127327	0.0612199	4.25844e-05	0.00292163	0.0310406	0.0163558	0.00996444	0.0711654	0.294209	0.00720843	0.0192969	0.0206308	0.0851301	0.0325549	0.0461518	0.0817348	0.023086	0.050952	0.000995314	0.000747018	0.0266822	0.0109943
AppNL-G-F	6	0.00147929	0.407208	2.7152e-05	0	0.410424	0.559051	0.270341	0.102214	0.340952	0.284284	0.32047	0.105026	0.0461784	0.184584	0.0244587	0.156384	0.0397335	0.0176487	0.109348	0.017883	0.0214974	0.0734561	0.0723665	0.000241413	0.0574107	0.00289063	0.000654593	0.0473696	0.121639	0.382588	0.322485	0.0387482	0.00125141	0.0983252	0.150322	0.3571
AppNL-G-F	6	0	0.0446683	0.0318757	0.0383793	0.136655	0.0346672	0.243015	0.370012	0.150932	0.117084	0.156404	0.251771	0.21598	0.00335861	0.177906	0.022316	0.0485634	0.00921314	0.100424	0.133653	0.0393365	0.0040761	0.0129634	0.0024362	0.00654928	0.0127286	0.098219	0.159644	0.0370529	0.0070692	0.396805	0.000319553	0.0189884	0.0215198	0.336195	0.378417
AppNL-G-F	6	0	0.0888723	0.0393384	0	0.042044	0.0329201	0.0263604	0.151404	0.0511537	0.00260346	0.00907771	0.0133811	0.000161451	0.000258853	0.0289832	0.0247147	0.000506301	0.0049387	0.222113	0.0165777	0.0264654	0.0694737	0.00676776	0.00414992	0.100195	0.0610046	0.0672364	0.0185603	0.000144777	0.0350317	0.435431	0.0482848	0.00756215	9.67429e-05	0.159126	0.120517
AppNL-G-F	6	0.0192422	0.0392067	0.448385	0.066977	0.114336	0.15057	0.0404764	0.00701763	0.00157611	0.0148133	0.0207137	0.398503	0.162344	0.000439749	0.00113614	0.0533433	0.0312359	0.0477357	0.0576915	0.0119452	0.00171911	0.022582	0.0156122	0.0413458	0.00419918	0.000151304	0.013045	0.0129678	0.00704438	0.00507884	0.00853815	0.00415815	0.0028865	6.94693e-05	0.033782	0.0787451
AppNL-G-F	6	0.041044	0.0529199	0.300765	0.105073	0.00277225	0.428628	0.0016188	0.017268	0.110983	0.0400531	0.0887267	0.020053	0.00466912	9.68848e-05	0.00237059	0.00766037	0.0443135	0.0175079	0.0148606	0.170061	0.0876096	0.00230588	0.00458054	0.107453	0.0774381	0.00595334	0.000673471	0.021725	0.0309669	0.00452018	0.0671281	0.0230028	0.00756215	0.168049	0.0690448	0.246278
AppNL-G-F	6	0	0.129697	0.373857	0.0130234	0.0873153	0.00236082	0.00407092	0.0713682	0.0364931	0.0322474	0.0814068	0.0101164	0.0278014	0.000185946	0.0766175	0.0299379	0.0549229	0.0211262	4.67029e-05	0.0130745	0.00207106	0.0294373	0.0111451	0.0189143	0.00799256	0.0390103	0.000298953	0.0133355	0.000654046	0.00014633	0.00695019	5.14278e-05	0.0042749	0.00778272	0.0844427	0.349039
AppNL-G-F	6	0.0121435	0.0287773	0.164561	0	0.00244357	0.00619708	0.0309374	0.00741863	0.0202362	0.0426241	0.0111468	0.012225	0.00705107	0.0280946	0.0154958	0.0356888	0.00178872	0.00741836	0.0062093	0.00566101	0.00997627	0.00146508	0.00324488	0.0142788	0.0133378	0.0125595	0.01796	2.95744e-05	0.011665	0.00104023	0.00436651	0.00270047	0.00222389	0.004542	0.0193958	0.47549
AppNL-G-F	6	0.0121435	0.0145397	0.137788	0.00294592	6.08115e-05	0.0132893	0.0127582	0.0559528	0.000141679	0.000112182	0.00282173	0.0325478	0.00360252	0.144788	0.000172141	0.00487663	0.00679715	0.00493328	0.0012847	0.014248	0.073875	0.0161768	0.0391468	0.0474354	0.00489139	0.0114118	0.0177319	0.0211771	0.0460468	0.0181457	0.0476728	0.0376621	0.0202884	0.0861377	0.0530118	0.124342
AppNL-G-F	6	0.207462	0.0463257	0.266411	0.0659716	0.0189586	0.0139405	0.0356372	0.016906	0.000820811	0.0425266	0.00255895	0.0216348	0.0112715	0.0166301	0.0107772	0.0340733	0.0106488	0.0199499	0.000113677	2.16884e-05	0.000324967	0.021358	0.000221418	0.0629509	0.0519368	0.042993	0.00189224	0.00559158	0.00630342	0.00696333	0.0297981	0.0012486	0.00145021	0.023565	0.0494477	0.397638
AppNL-G-F	6	0.0269668	0.0576937	0.0343442	0.0100983	0.105002	0.000249298	0.0511537	0.0042473	0.000350126	0.0228245	0.0044415	0.0213943	0.035302	9.65655e-05	0.00987594	0.00114235	0.0149464	1.41659e-05	0.0892372	0.012741	0.000145269	0.00230487	0.0212791	0.119292	0.0660235	0.0186305	0.0109126	0.0126709	0.0039295	0.00842919	0.00190297	0.0134537	0.00219095	0.0155637	0.103926	0.311166
Control	6	0.060073	0.142142	0.00124426	0.119431	0.01132	0.00717472	0.106864	0.0595653	0.0115929	0.0227732	0.00099704	0.00140847	2.73391e-06	0.00961705	0.000150593	0.0401247	0.152915	0.0228635	0.0557613	0.00943567	0.000525163	0.120225	0.0151006	0.705492	0.0956233	0.968746	0.0223031	0.000760397	0.0977161	0.000836823	0.0365914	0.210681	0.000122527	0.0300131	0.0355195	0.0584629
Control	6	0.0588985	0.0969041	0.29953	0.238441	0.0825414	0.213057	0.0626191	0.363562	0.0934906	0.0253861	0.0801554	0.0581127	0.0759111	0.0137272	0.0785887	0.0625851	0.00990754	0.00073242	1.10649e-05	0.168458	0.145193	0.00118044	0.435573	0.0458649	0.043861	0.00243023	0.06556	0.00970077	0.0120143	0.00495618	0.00641629	0.00113352	0.0146298	0.785202	0.0225839	0.159249
Control	6	0.014377	0.22904	0.242985	0.434904	0.0669884	0.0768518	0.0461018	0.0253515	0.00169509	0.0149118	0.182114	0.00427622	0.056553	0.00196583	0.000858286	0.000645584	0.000330706	0.000412438	0.129666	0.0908875	0.0267337	0.0421216	0.0213558	0.0510954	0.120168	0.000153877	0.0282453	0.0352776	0.0164902	0.0442947	0.563279	0.0959358	0.00845476	0.240541	0.0952312	0.960022
Control	6	0.0016	0.0540993	0.231609	0	0.0193599	0.0517826	0.00223741	0.00204221	0.000545206	0.00146976	0.0022877	0.0124216	0.0377816	0.0857371	0.0193141	0.019645	0.066994	0.0104257	0.102032	0.057704	0.103015	0.000155166	0.0212731	0.000124716	0.0275214	0.0159914	0.270327	0.0118088	0.0222441	0.00823961	0.0285092	0.071864	4.67364e-05	0.00112402	0.0208681	0.243146
AppNL-G-F	6	0.0100983	0.128119	0.006071	0.060073	0.792975	0.0183596	0.0294673	0.0133503	0.0422864	0.0622666	0.0878116	0.0464491	0.0567369	0.0350945	0.00961126	0.0569993	0.0362845	0.00688923	0.079153	0.00556253	0.141105	0.0186159	0.0432297	0.000404319	0.00188878	0.00257836	0.000225536	0.301608	0.0373966	2.22072e-06	0.029917	0.148936	0.00910351	0.0582092	0.11444	0.000211931
AppNL-G-F	6	0	0.0256606	0.0273857	0.0124713	0.00167969	0.0466675	0.0766497	0.12575	0.0375231	0.00624625	0.0206654	0.00515712	0.0883814	0.00298859	0.195606	0.000464758	0.0075255	0.00357221	0.000120502	0.0320491	0.0122556	0.0178001	0.000126786	0.0969418	0.00772339	0.00425285	0.026612	0.0613197	0.0141281	0.0217605	0.149566	0.0469053	0.00163043	0.0391879	0.0668704	1.50888e-06
AppNL-G-F	6	0	0.045581	0.0179452	0.418954	0.140346	0.460262	0.00555985	0.0408091	0.110044	0.00255553	0.00121338	0.0130604	0.182097	0.0278911	0.000377333	2.04398e-06	0.0157435	0.00015407	0.0573244	0.0047372	0.0310245	0.223923	0.0450558	0.00629169	0.0162772	0.0971099	0.0680864	0.0642545	0.00396519	0.0349681	0.0196497	0.00255607	0.0129024	0.00515819	0.0123637	0.000105315
AppNL-G-F	6	0	0.123622	0.0436176	0.368622	0.0106218	0.374659	0.159798	0.225057	0.209131	0.18467	0.0883478	0.0034693	0.113509	0.00473805	0.134034	0.000143654	7.61222e-05	0.0445894	0.0107116	0.0576311	0.00364843	0.0658437	0.0200845	0.00777204	0.00237831	0.00164373	0.00451792	0.110018	0.00894237	0.0522106	0.548946	0.0416723	0.00246464	0.0012528	0.00143618	0.000287836
Control	6	0	0.0693645	0.144212	0.269139	0.0810543	0.015864	6.56395e-05	2.81522e-05	0.0133486	0.0481261	0.00670096	1.41208e-05	0.0338381	0.0582377	0.165472	0.0387769	0.16175	0.151854	0.132984	0.00247217	0.0121086	0.0549982	0.0204611	0.00456935	0.0707185	0.0736306	0.0120462	0.104904	0.0229136	0.0390735	0.0381879	0.0380905	0.000178852	0.00960192	0.00631153	0.00678393
Control	6	0	0.0978723	0.142318	0	0.162102	0.00214783	0.0151037	0.075962	0.12653	0.0507015	0.112608	0.00189382	0.123042	0.0436493	0.0126716	0.000348576	0.0427565	0.001511	0.0154387	0.00107525	0.000882074	0.0730866	0.115955	0.0394605	9.95878e-05	0.0591916	0.0453522	0.0452236	0.0007957	0.0496783	0.00534095	0.0668585	0.103425	0.0340638	0.098625	0.0623005
Control	6	0	0.122445	0.224158	0.138018	0.0338025	0.365942	0.45763	0.224471	0.543049	0.00517066	0.385751	0.0457786	0.310383	0.0858091	0.0484817	0.0242168	1.17749e-05	0.158703	0.042228	0.179438	0.000986577	0.0107967	0.000235323	0.106616	0.23346	0.0111324	0.00917747	0.0206447	0.224387	0.0190198	0.503158	0.424696	0.0032894	0.0087267	0.0488843	0.12607
Control	6	0	0.0743709	0.142704	0.332195	0.00724769	0.0609886	0.00515084	0.0129924	0.00117982	0.00309676	0.00522245	0.0984489	0.00904608	0.0161191	9.16661e-06	0.00224088	0.0405805	0.0215896	0.00190812	0.0493442	0.0478569	0.000352409	0.00586365	1.28835e-06	0.00343006	0.0289325	0.000570211	0.00751683	0.00556624	0.0257908	0.113422	0.000110128	0.0238743	0.0134927	0.0234724	0.0950901
Control	6	0	0.119558	0.0472605	0.289941	0.307429	0.218396	0.260955	0.400207	0.00401704	0.134059	0.133561	0.150109	0.00286956	0.0515154	0.0973022	0.00335551	0.000186183	0.00123401	0.0176133	0.237565	0.0564112	0.158058	0.000863455	0.0218985	0.275003	0.111605	0.00480422	0.0688832	0.00963199	0.099134	0.312223	0.0349042	1.62389e-05	0.0628532	0.0103873	0.0237139
Control	6	0	0.0897908	0.0948266	0.144301	0.293226	0.00741668	0.00457725	0.000614606	0.172417	0.103061	0.0982617	0.0837641	0.107041	0.0581009	0.0858399	0.0131121	0.00091423	0.0177875	0.0356118	0.00382953	0.00447504	0.158154	0.00293628	0.000243581	0.0168489	0.0195208	0.00143375	0.000695085	0.00926453	0.0180474	0.00132231	0.286414	0.0766835	0.0983237	0.18667	0.470447
Control	6	0	0.11899	0.459864	0.0209891	3.24618e-05	0.00249713	0.00219116	0.240164	0.138847	0.000380929	0.0663387	0.275496	0.00751838	0.0149847	0.0274961	0.000132493	0.00758143	0.00290006	0.0017713	0.00304701	0.187835	0.0182784	0.0708973	0.0176687	0.0210372	0.267486	0.0443884	0.0354231	0.00736806	0.0101106	0.0315278	0.0498253	0.0333874	0.0733266	0.0329458	0.112095
Control	6	0	0.128456	0.304289	0.33562	0.754564	0.27485	0.103731	0.0829872	0.0135866	0.0371883	0.180139	0.189906	0.00753927	0.0172739	0.00369352	0.0121508	0.161771	0.0108854	0.000747184	0.109483	0.425266	0.0120523	0.108191	0.00310213	0.0256601	0.0109535	0.0298212	0.0197688	3.68624e-05	0.00586617	0.0303769	1.46829e-05	0.0462104	0.00970524	0.0326026	0.0361633
AppNL-G-F	6	0	0.104372	0.198901	0	0.0643884	0.303775	0.0369518	0.0474762	0.0368593	0.00407564	0.0380663	0.0480243	0.148592	0.0177358	0.000141969	0.0177447	0.000173667	0.00410695	0.036563	0.0179475	0.0239169	0.0222177	0.00123125	0.0619064	0.000316346	0.00741447	0.000508358	0.00264949	0.00149327	0.0112267	0.0396154	0.0512334	0.000297406	0.0275745	0.0246372	0.199478
AppNL-G-F	6	0	0.0763341	0.356588	0.463405	0.198599	0.0156587	0.104925	0.111818	0.000316905	0.203175	0.133665	0.0238972	5.81062e-05	0.00985566	0.00185875	0.000800094	0.00202884	0.0060154	0.00175345	3.27962e-05	0.00107489	0.74071	3.46134e-05	0.000319245	0.0013911	0.0160767	0.282343	0.0390488	0.0798718	0.00165768	0.000188789	0.0405346	0.0260129	0.0315111	0.138011	0.0741132
AppNL-G-F	6	0	0.0263306	0.0243382	0.0575352	0.115979	0.181666	0.107406	0.000850859	0.0036286	0.0247387	0.128846	0.0586056	0.00775393	0.00881164	0.0146602	0.0136253	0.00595328	0.00352785	0.0406811	0.00498118	0.0251355	0.0986527	0.021173	0.00758272	0.0644155	0.000325771	0.0215016	0.0389167	0.128606	0.0715907	4.8397e-05	0.000874048	0.0249818	0.0679885	0.133844	0.721391
AppNL-G-F	6	0	0.0146224	0.0328357	0.0104692	0.000317142	0.00644581	0.0173529	0.000308821	0.0056748	3.77159e-05	0.00687293	0.00116974	0.000293398	0.00627574	0.0347138	0.0139601	0.00183962	0.0101198	0.00339007	0.00588287	0.0311957	0.0644457	0.00467061	0.0239901	0.0755073	0.00527263	0.0371997	0.0272547	0.026406	0.00826999	0.0930813	0.00762727	0.027156	0.0488112	0.071045	0.0630383
Control	6	0	0.083372	0.310186	0.0249941	0.303774	0.0104431	0.00147057	0.143404	0.0293309	0.32351	0.0140807	0.0321107	0.051273	0.0218688	0.00515821	0.0269632	0.00642456	0.0335134	0.0203189	0.00727659	0.00268643	0.0122957	0.0652409	0.041177	0.104056	0.00331226	0.0319137	0.00958042	0.000268576	0.00432822	0.0320736	0.00519158	0.0300024	0.0628984	0.0225834	0.449776
Control	6	0.0011939	0.0654958	0.00412385	0.126516	0.209302	0.376275	0.0365747	0.110039	5.03095e-05	0.0631617	0.00933243	0.0411749	0.0275177	0.00939852	0.0334447	0.0410168	7.45173e-05	0.0072581	0.00354153	0.00513955	9.09746e-12	0.00784839	0.00521912	0.00299281	0.0663638	0.00731195	4.73699e-06	0.00639769	0.00616403	0.00279603	0.0303349	0.00153485	0.00104927	9.06815e-05	0.0239338	0.311479
Control	6	0.00503333	0.000238654	0.0433215	0.000824621	0.0285751	0.0123058	0.047933	0.00204523	0.00343226	0.0495538	0.340136	0.0155037	0.0223624	0.00338658	0.000783166	0.095824	0.255247	0.0934783	0.0268222	0.000797321	0.0362845	0.0122578	0.081165	0.00047103	0.00799571	0.0249816	0.0395379	0.0578111	0.0293485	0.0591018	0.0534157	0.0482959	0.00918338	0.000893537	0.0152657	0.409999
Control	6	0	0.0920451	0.0459839	0.178055	0.0112663	0.00876347	0.291922	0.00864165	0.00679544	1.98112e-05	0.094551	0.0301435	0.00548131	0.0316544	0.0540398	0.0219248	0.0322054	0.00524783	0.0246477	0.0636227	0.0237451	0.000916033	0.000640998	0.0545344	0.00379339	0.0224928	0.0533123	0.0516941	0.0138447	0.0196545	0.034796	0.0160267	0.000329171	0.00853006	0.0194888	0.0753372
Control	6	0	0.0360704	0.0850572	0.503483	2.0348e-05	0.00872212	0.000393774	0.0143193	0.0017374	7.66422e-05	1.37036e-05	0.0835993	0.0363668	0.016275	0.0128671	0.0413365	0.00302921	0.0281794	0.00183378	0.027802	0.0034928	0.0159706	0.00642974	0.00214587	5.416e-08	0.0168132	0.00567429	0.0486075	0.0108289	0.025895	0.0832132	0.0022256	0.0150069	0.00390821	0.0377985	0.0318547
Control	6	0	0.00236933	0.0247897	0.163343	0.204409	0.0678148	0.0598635	0.11966	0.0124172	0.0190817	0.0501259	0.0545321	0.000179482	0.0476088	0.00143045	0.027869	0.0378425	0.0184688	0.00497268	0.207737	0.0746687	0.00295834	0.0200057	0.0574059	0.0176101	0.0143582	0.000109922	0.00292997	0.00445774	0.0979374	0.0213721	0.0129766	2.01686e-05	3.37764e-05	0.0179188	5.05762e-05
Control	6	0	0.0490003	0.0251141	0.0307868	0.00328438	0.101015	0.196329	0.000516042	0.00974134	7.38277e-05	0.0381718	0.111848	0.0363849	0.000712492	0.0130724	0.000457129	0.00702235	0.0323952	0.00206502	0.00285551	0.0244444	0.0190307	0.00485176	0.0268626	0.0608141	0.10102	0.00274893	0.0108567	0.0213963	0.000979547	0.00438387	0.00767808	0.00298685	0.0059968	0.0270473	0.137558
Control	6	0	0.0784046	0.204872	0.0316661	0.056813	0.109685	0.0886695	0.00778909	0.0242202	0.0158963	0.0507645	0.0115548	0.229902	0.00250721	0.0698213	0.0037416	0.0522475	0.0402468	0.0389513	0.202689	1.69766e-05	0.00144412	0.0346181	0.18211	0.000528146	0.047521	0.0284324	0.000655166	0.0331151	0.0162323	0.00254337	0.37	0.00319069	0.00601901	0.0218004	0.0126007
Control	6	0	0.0127389	0.108133	0	0.174462	0.0265788	0.0375557	0.0138446	0.00477148	0.000284934	0.000413985	0.0318759	0.00082095	0.0151593	0.0155687	0.000464722	0.0247528	0.0724498	0.00524272	0.00626694	0.00995322	0.176505	0.0105929	0.207872	0.00280433	0.00186037	0.00511902	0.0135083	0.00378046	0.0381323	0.00120654	0.0339409	0.000926793	0.00632166	0.222284	0.0397357
Control	6	0.00016384	0.00575102	0.0683347	0	0.00265069	0.0123499	0.016005	0.0475105	0.00662336	0.0387552	0.00391994	0.0387241	0.0178413	0.019592	0.131771	0.0397201	0.0852097	0.0145652	0.0149595	0.0195597	0.0936477	0.0159512	0.0717174	0.0409484	0.320191	0.292858	0.107814	0.20167	0.00240106	0.00743501	0.00103972	0.0339814	0.00664882	0.0020174	0.0436762	0.512845
Control	6	0.000822189	0.0875234	0.189321	0.000928174	0.0370636	0.0108998	0.0120705	5.14131e-07	0.0728568	4.25587e-08	0.00121621	0.00749186	0.00693877	0.00594423	0.00334841	0.00851916	0.00730197	0.019498	0.000899217	0.012427	0.0384669	0.0031645	0.00463851	0.00256078	0.00870082	0.0213843	0.0214591	0.008882	0.000513164	9.87261e-05	0.0446311	0.000155047	0.0342899	0.00168765	0.0164305	0.0227782
Control	6	0	0.0462178	0.00800395	0	0.0012457	0.00364671	0.190717	0.00667533	0.0110418	0.097086	0.013842	0.0224183	0.0444991	0.0541948	0.025635	5.28614e-05	0.00386671	0.0205426	0.00168758	0.00363534	0.0423861	0.00851165	0.0193566	0.000279147	0.0649435	0.00816089	0.00111576	0.00236943	0.0348314	0.000520816	0.00280569	0.119877	0.047593	0.0208832	0.101376	0.291631
AppNL-G-F	12	0.191752	0.0731023	0.384335	0.0312731	0.0464395	0.0102496	0.00195752	0.0222588	0.0347717	0.01987	0.00212156	0.171627	0.119409	0.00649963	0.00389851	0.00471995	0.115676	0.00138136	7.28374e-05	0.0206718	0.0688818	0.0154191	0.00261632	0.00258031	1.22185e-06	0.0529482	0.0324528	0.0406307	0.00241125	0.00239472	0.00624014	0.00285871	0.000111814	0.0240253	0.0853054	0.109956
AppNL-G-F	12	0.0199496	0.126619	0.164936	0.0930767	0.250687	0.096782	0.0653913	0.0417219	0.0281272	0.0474472	0.0448087	0.0593785	0.00817802	0.00194664	0.0675622	0.0104228	0.0821193	0.087767	0.0269496	0.000101255	0.0419333	7.82813e-06	0.00920383	0.0075127	0.00623499	0.000559291	0.0282172	0.0129257	0.000839596	0.0042198	0.01509	0.11157	0.681714	0.0932835	0.147346	0.392002
AppNL-G-F	12	0.00153787	0.104177	0.0540232	0.162966	0.0860651	0.190486	0.0388865	0.0264084	0.117362	0.0389917	0.0106108	0.041311	0.0434949	0.00192058	0.0917784	0.0809712	0.0238646	0.145186	0.00760846	0.074607	0.184086	0.00805094	0.385811	0.0697649	0.000946585	0.0618382	0.0123075	0.0266874	0.0141912	0.00720765	0.00141659	0.025852	0.0557287	0.0423483	0.0915385	0.0849301
AppNL-G-F	12	0.111498	0.14426	0.142042	0	0.0553475	0.00307151	0.0321727	0.17382	0.163523	0.0126133	0.0105745	0.0167974	0.000896478	0.000100038	0.0190002	0.00269663	0.0214294	0.00623615	0.0106707	0.00194802	0.000248767	0.00513278	0.0106363	0.0652232	1.65478e-05	0.0673701	0.0270865	0.00497574	0.0011006	0.0394632	0.0414382	0.00601126	0.0509993	0.000670651	0.120801	0.265633
Control	12	0	0.119558	0.12656	0.517134	0.108356	0.514607	0.310298	0.306632	0.0280191	0.05111	0.15522	0.0338514	0.00161289	0.00379322	0.0135865	0.0284134	4.99252e-05	0.00517644	0.00857677	0.0502497	0.0210693	0.092416	0.0034801	0.0123895	0.00900259	0.00429361	0.0267826	0.0545568	0.000434505	0.0305972	0.0140876	0.00545153	0.0232635	0.000175256	0.115609	0.0873713
Control	12	0.00191108	0.126619	0.105769	0.0746514	0.410411	0.240908	0.379174	0.461132	0.398439	0.400876	0.273935	0.078313	0.0480668	0.0441974	0.147288	0.178746	0.0149248	0.0766595	1.81739e-05	0.0321815	0.0547547	0.000974451	0.00350075	0.0026099	0.147705	0.179966	0.065306	0.204428	0.107747	0.495066	0.0362105	0.346784	0.138464	0.145567	0.179958	0.552543
Control	12	0.00214568	0.276273	0.475696	0.375866	0.106576	0.0410767	0.0246943	0.0012652	0.00112386	0.00382982	0.0149405	0.00796255	0.000333891	6.76312e-05	0.000105773	0.0225382	0.0169223	0.0234736	0.00413594	0.00755171	0.00765979	0.00438381	2.31882e-06	0.0182316	0.00205668	0.00453521	3.84763e-07	0.00209998	1.57333e-07	1.00645e-07	0.00212224	4.12014e-08	0.00213067	0.0130671	0.0727116	0.915696
Control	12	0.0460498	0.126619	0.0231431	0.0826871	0.751768	0.351421	0.367353	0.351964	0.00967439	0.286474	0.243817	0.121005	0.00395859	0.000859515	0.00443802	0.0192241	0.0137402	0.343998	1.1003e-06	0.00702148	0.00942688	0.034102	0.014734	0.0299555	0.0175601	0.00948416	0.0479916	0.0712523	0.124338	0.0133777	0.00779804	0.0779408	0.00162022	0.00331999	0.0632981	0.317053
Control	12	0.391529	0.0116901	0.00322555	0.0469862	0.00477041	0.00423443	0.00830055	1.70106e-05	0.0070599	0.000190901	0.005765	2.38241e-05	0.00806467	0.000908863	0.00038276	7.96766e-05	0.00673247	0.00686812	0.00699747	0.00712072	0.00366152	0.00133942	0.000109666	0.0291545	0.0002319	0.0154082	0.00783115	0.0339787	0.0261307	0.00165454	0.00595887	0.0104303	0.109429	0.00832571	0.041139	0.371834
Control	12	0	0.128456	0.305386	0.4993	0.265771	0.0299709	0.178656	0.205954	0.040323	0.138119	0.202282	0.0227996	0.0470089	0.0626359	0.180361	0.0419167	0.179979	0.000220996	0.124237	0.000410399	0.119401	0.503999	0.0284706	0.0342132	0.108022	0.000332685	0.299334	0.0215173	0.0022973	0.321021	0.00176056	0.00124331	0.00178972	0.0432909	0.10077	0.335717
Control	12	0.0277778	0.107237	0.00789836	0.0122471	0.053483	0.00573083	0.0127974	0.00131773	0.00067298	0.000495987	0.000591152	0.00141181	0.00868692	0.00695096	0.0164201	0.00166989	0.0479105	0.00403727	0.0310338	0.13305	0.0122463	0.159366	0.00793144	0.239663	0.0904166	0.0717231	0.336682	0.275262	0.028577	0.0615482	0.0106325	0.0560691	0.0922836	0.113857	0.0375293	0.183872
Control	12	0.0095987	0.124811	0.470841	0.256802	0.349682	0.245508	0.448833	0.321697	0.125453	0.146018	0.0683208	0.0783548	0.0743961	0.0970776	0.00493012	0.00706047	0.0511662	0.0001027	0.32414	0.00174309	0.0112414	0.00944815	0.0373053	0.00827372	0.0117108	0.0122159	0.0281275	0.00752091	0.00673456	0.055193	0.109814	0.0139416	0.0399113	0.0029776	0.0875283	0.195962
Control	12	0.00108778	0.123032	0.0899105	0	0.169266	0.245885	0.10869	0.00403991	0.0854041	1.34203e-06	0.0116457	0.100406	0.0936378	0.0122827	0.119727	0.00447297	0.106343	0.0109476	0.00650739	0.0155431	0.0253567	0.0262035	0.0348709	0.106256	0.0490948	0.000203497	0.000492554	0.0841557	0.0130442	0.000158499	0.174904	0.00783712	0.0209718	0.00322274	0.126377	0.20386
AppNL-G-F	12	0.003025	0.121862	0.0316324	0.00321111	0.00435748	0.168945	0.0261106	0.0285972	0.295748	0.0994015	1.2114e-05	0.0693435	0.00281692	0.117391	0.022072	0.0502543	0.00476152	0.00259974	0.0201231	0.0420254	0.000601297	0.00780135	0.110908	0.0102853	0.168143	0.0218808	0.000628092	0.00158752	0.00504546	0.000665767	0.00449474	0.0417734	0.073157	0.0579941	0.0121775	0.000241945
AppNL-G-F	12	0.0140383	0.124811	0.000110329	0.0291099	0.00328438	0.00748933	0.0377598	0.0706387	0.260925	0.0325373	0.00684315	0.0141906	0.120739	0.00151203	0.000949808	0.00217233	0.0157446	0.0735161	1.42311e-05	0.00852828	0.00222985	0.00636038	0.0157208	0.431041	0.127681	0.00129709	0.00205146	0.0190534	0.113329	0.0364718	0.0154584	0.0240226	0.0169043	0.00024201	0.0708846	0.00618299
AppNL-G-F	12	0	0.00631943	0.0534864	0	0.180834	0.000790566	0.349921	0.0146153	0.0200481	0.00869341	0.050056	0.0453195	0.0187492	0.00311576	0.0432414	0.0051968	0.000272008	0.00526712	0.000137474	0.00551177	0.00140933	0.00650264	0.0106363	0.00639618	0.0372388	0.156808	0.064849	0.197964	0.000230563	6.80404e-05	0.00134009	0.0281928	0.000109788	0.0440517	0.0340644	0.0109413
AppNL-G-F	12	0	0.0013204	0.00338487	0.000426223	0.00253224	0.00172686	0.00512365	0.0324825	0.0378086	0.00492937	0.056814	0.0116192	0.0196938	0.0477219	0.0156933	0.00910716	0.200582	0.00339896	0.105937	0.0341547	0.000322874	0.0393507	0.000334245	0.00177734	0.130371	0.0786441	0.0104526	0.00532479	0.0615835	0.000299932	0.087572	0.00362219	0.0133379	0.0068089	0.127836	0.180943
AppNL-G-F	12	0	0.039787	0.0175089	0.050176	0.019702	0.00489241	0.00322299	0.246255	0.366683	0.0350115	0.299652	0.0482043	0.020178	0.00410305	0.0353117	0.0136112	0.0242315	0.00227499	0.00252072	0.0229127	0.0515575	0.00038974	0.00840927	0.00910295	0.103173	0.01335	0.0169848	0.00635541	0.0178101	0.0212866	0.0185847	0.0142146	0.00489341	0.020766	0.0669888	0.522278
AppNL-G-F	12	0	0.056967	0.0283647	0	0.445769	0.226024	0.229467	0.241778	0.102396	0.081356	0.00450523	0.0240127	0.0347418	1.69907e-05	0.0105202	0.0924544	7.12522e-05	0.017637	0.00121054	0.00375782	0.0946061	0.00649995	0.00623779	0.0350194	0.0490749	0.0193714	0.00331158	0.0478439	0.00591941	0.0020448	0.0133085	0.00444596	0.00921276	0.0724419	0.283433	0.116832
AppNL-G-F	12	0	0.101854	0.134155	0.00183254	0.0894879	0.595414	0.164313	0.124333	0.119831	0.339713	0.104227	0.142661	0.153032	0.153931	0.00872455	0.000312049	0.035153	0.202889	0.0450907	0.00133649	0.235093	0.000538383	0.03096	0.00775718	0.264657	0.0917396	0.0472368	0.00810682	0.0685202	0.0028528	0.00347205	0.0033295	0.0392372	0.00223755	0.0397987	0.0151737
AppNL-G-F	12	0	0.110086	0.00232308	0.204578	0.0510319	0.0842575	0.146074	0.035149	0.0341109	0.00239282	0.141688	0.00820362	0.134357	0.00481997	0.0350965	0.000568468	0.0488557	0.0401004	0.0621471	0.0302937	0.0940846	0.0549812	0.0809816	0.0947528	0.07185	0.0804503	0.0741864	0.29896	0.107095	0.0472856	0.0233103	0.0143622	0.0441158	5.43073e-05	0.00114382	0.0937584
AppNL-G-F	12	0.0468595	0.12784	0.398678	0.000354325	0.0703256	0.0261131	0.10198	0.0594856	0.0969376	0.194793	0.0590553	0.15872	0.247841	0.134674	0.0557917	0.00789286	0.00179498	0.00125611	0.0353133	0.194934	0.0170625	0.0352535	0.00779991	0.331685	0.561723	0.00162684	0.49093	0.00103438	0.000397083	0.00234806	0.0180014	0.0827654	0.00165606	0.00463141	0.0495918	0.0368421
AppNL-G-F	12	0.018612	0.134146	2.87385e-05	0.0464629	0.00847448	0.0984708	0.0690935	0.0163726	0.321708	0.0101869	0.0617278	0.0253152	0.0168636	0.103202	0.0240987	0.00413554	6.61923e-05	0.0330667	0.0370116	0.0862739	0.0093095	0.00627605	0.0115542	0.000945407	0.0863544	0.015597	0.00114288	0.123345	0.00513468	0.000312554	0.110745	0.0126476	0.00727239	0.00331291	0.016254	0.0113318
AppNL-G-F	12	0.027225	0.104164	0.325043	0.0625	0.0740805	0.0181048	0.0146826	0.0830653	0.0183082	0.000454718	0.186486	0.0192974	0.0713706	0.00660926	0.0679907	0.00672153	0.0196688	0.0181486	0.00237422	0.436139	0.00849177	0.0244158	0.046538	0.0214376	0.000253476	0.00109959	5.44676e-07	0.000115953	0.028538	0.00261935	0.00176446	0.00511369	0.0116818	0.0537147	0.0457514	0.0474893
AppNL-G-F	12	0.0105969	0.168407	0.364432	0	0.0927684	0.0219864	0.00422606	0.00515661	0.00476529	0.00325819	0.00135426	0.000471813	0.078349	0.00137738	0.0177721	0.0247422	0.000334555	0.000425178	0.000371435	0.0275387	0.0279176	0.0113995	0.0161812	0.000753582	0.0165402	0.0228859	0.126226	0.00476853	0.49613	0.229781	0.191971	9.89721e-05	0.100139	0.0128629	0.0315148	0.121047
AppNL-G-F	12	0.00180625	0.142864	0.0737861	0	0.212145	0.00728553	0.0142169	0.000404154	0.0319296	0.0118798	0.0291761	0.00673314	0.00699589	0.0372379	0.00975332	0.000139683	0.0330235	0.00150946	0.00025738	0.00239206	0.0303631	0.00174388	0.000855386	0.00448308	0.0029697	0.0112358	0.0130143	0.0415503	0.000522695	0.000825336	0.00585322	0.0102529	0.00155754	0.0377865	0.107028	0.115555
AppNL-G-F	12	0.021025	0.00202928	0.252741	0.2116	0.000698433	0.13504	0.155043	0.371472	0.0609049	0.0589635	0.0796806	0.00301042	0.0717361	0.214786	0.217159	0.0167141	0.00666376	0.0191498	0.00256149	0.0388152	0.460849	0.000117663	0.0376563	0.0876565	0.0111341	0.134595	0.0193735	0.0523804	0.460501	0.00359129	0.000850846	0.0269206	0.00848231	0.00037243	0.0648231	0.0395432
AppNL-G-F	12	0.496242	0.0827532	0.103929	0	0.0650946	0.00121902	0.000641391	0.0232364	0.0235566	0.0147182	0.0285098	0.121814	0.0153034	0.0206533	0.0123166	0.00653079	0.00145345	0.000798536	0.000202136	0.0167705	0.00319007	0.00287249	0.0578908	0.211608	0.0322054	0.00677025	0.0227358	0.0210372	0.0147719	8.55369e-11	0.00078879	0.0169414	0.0068406	0.305569	0.258717	0.0846073
Control	12	0	0.0538704	0.058772	0.0172973	0.330315	0.0262868	0.183181	0.34989	0.266205	0.086244	0.0519866	0.0213568	0.12356	0.0161778	0.0033362	0.0547562	0.0090815	0.135338	0.0876094	0.00271835	0.00605052	0.000231536	4.34141e-05	0.01494	0.0246128	0.0128485	0.000916244	0.0374177	0.0776537	0.000528192	0.0578462	0.018331	0.0753869	0.299179	0.280607	0.0421039
Control	12	0.213346	0.0275101	0.228257	0.0533365	0.0325784	0.0175621	0.564028	0.12273	0.115188	0.10882	0.179007	6.24964e-06	0.146767	0.0138695	0.0405173	0.06303	0.0209553	0.0974503	0.0940355	0.00121497	0.039398	0.00069126	0.000175291	0.122638	0.095094	0.116785	0.00730524	0.408248	0.0358283	0.0341981	0.0236468	0.0023621	0.0533988	0.0766909	0.0909461	0.00469418
Control	12	0.00826446	0.111281	0.314047	0.332195	0.0343304	0.000240697	0.00123909	0.0911685	0.0217714	0.000109274	0.0486619	0.0641498	0.00369497	0.0133291	0.0300285	0.00150115	0.0016725	0.0146541	0.0205427	0.0148994	0.0178088	0.00138509	0.00051297	0.0130768	0.00442508	0.0404936	0.0332007	0.0218237	0.00274646	0.00381538	0.00312235	0.000155774	0.00921276	0.0524664	0.145065	0.151964
Control	12	0.0460498	0.0241742	0.00453159	0.0460498	0.217945	0.0502159	0.0385894	0.340248	0.22327	0.00231376	0.333066	0.256895	0.0184466	0.0311049	0.0952621	0.0610855	0.000155951	0.0205543	0.0101829	0.00381718	0.0597643	0.0033213	0.15607	0.00305896	0.0150337	0.165643	0.450604	6.02615e-05	0.219037	0.0918895	0.0686879	0.0520119	0.000368723	0.27897	0.306134	0.087787
Control	12	0	0.132572	0.0604249	0.117165	0.0268843	0.00230751	0.00177205	0.00174902	5.35743e-05	0.014327	0.052412	0.023083	0.00973072	0.0288918	0.00697575	0.000910036	0.00114393	2.6087e-05	0.00164322	0.000895661	0.00289123	0.00178009	0.00125936	0.0805223	0.120852	0.123633	0.00515614	0.000239615	0.00392485	0.000393494	0.00046277	0.0160947	0.0129311	0.223859	0.0905286	0.564822
Control	12	0.0481856	0.0786878	0.319347	0.191099	0.00184668	0.0446207	0.0239244	0.0118061	0.0537529	0.048393	2.09193e-05	0.00649874	0.064397	0.0698719	0.0462546	0.0202103	0.00442474	0.0237391	0.0381189	0.00531733	0.0401451	0.00686824	0.000501263	0.0656776	0.0636673	0.105123	0.000397477	0.00114285	0.0213741	0.00443726	0.00424629	0.0270533	0.000827199	0.0201959	0.0667176	0.4411
Control	12	0.0046337	0.0948724	0.424144	0.0117918	0.0225983	0.00552358	0.000412053	0.00143054	0.0225681	0.00599044	0.0226611	0.00392493	5.99289e-05	0.00450631	0.000148134	0.0065904	0.00553922	0.00173074	0.000754954	0.00282861	0.00480459	0.00102263	5.46713e-06	0.0513963	0.0747439	2.44495e-05	1.60671e-07	1.22613e-05	0.00107494	0.00399684	0.00278065	0.00460065	0.000261661	0.0124894	0.00819912	0.274882
Control	12	0	0.139479	0.243975	0	0.000198792	0.0170109	0.0019697	0.00440452	0.00691423	0.0652053	0.0060017	0.0345847	0.0153853	0.000635066	0.00512572	0.00353097	0.00113159	0.000542848	0.00736111	0.00144546	0.0290294	1.22876e-05	0.000222737	0.145051	0.05341	0.0370432	0.0702438	0.0338178	0.0797767	0.0303031	0.0179106	0.00872517	0.0223527	0.354604	0.0276348	0.4424
AppNL-G-F	12	0.255814	0.0107371	0.00197232	0	0.00553766	0.000306374	0.0114781	0.101266	0.00129792	0.00647483	0.0262038	0.00752921	0.00745182	0.0238807	0.0075174	0.0041388	0.049912	0.000108809	0.0203215	0.00460959	0.0209194	0.0393961	0.000112876	0.0336458	0.0398314	0.000130186	0.106954	0.0297544	0.00176564	0.00105319	0.170194	0.0431383	0.000453276	0.00153265	0.0422383	0.0112841
AppNL-G-F	12	0.00580834	0.0477389	0.420447	0.0367435	0.215899	0.0113569	0.0831869	0.0107089	0.0764003	0.0387928	0.00814779	0.00749603	0.0512314	0.000312675	0.0328957	0.00342044	0.051088	0.172696	0.0931414	0.017812	0.0368321	0.00635333	0.149928	0.0032362	0.0734333	0.00201334	0.0411962	0.00274474	0.037462	0.0659938	0.0122622	0.0292606	0.00723429	0.0948424	0.0802357	0.00678723
AppNL-G-F	12	0.00475624	0.000867772	0.0275668	0	0.00463715	0.0620076	0.0104689	0.000326088	0.0325726	0.155692	0.027133	0.014937	0.0138606	0.096679	0.00104121	0.000783881	7.93887e-05	0.0582863	0.000159621	0.0161152	0.0308978	0.000232422	0.00312557	0.00369729	0.0208886	0.0153078	0.10231	0.00058715	0.00812651	0.0199031	0.00164891	0.0394076	0.0189645	0.275226	0.162234	0.0351348
AppNL-G-F	12	0	0.0129093	0.0985608	0.188356	0.00724769	0.272346	0.123998	0.0419813	0.0389942	0.156231	0.120919	0.0831839	0.121724	0.00218831	0.0144589	0.0398081	0.0773898	0.00141461	0.000531082	0.00968452	0.147569	0.00634916	0.009397	0.0140426	0.0137479	0.0262131	0.0302972	0.0286626	0.00018764	0.0110928	0.121268	0.0081892	0.000908997	0.288636	0.0722768	0.454771
Control	12	0	0.123062	0.303019	0.00444444	0.00254893	0.00647731	0.00651844	0.026205	4.7585e-06	0.0479495	0.0439819	0.111915	0.0762913	0.0410039	0.0114075	0.170266	0.149426	0.00653485	0.0564677	0.0868949	0.101753	0.0539467	0.0892706	0.131194	0.0175837	0.041725	0.0644802	0.0130027	2.76703e-05	0.0144239	0.0321085	0.0546422	0.00805689	0.00106325	0.105133	0.0475351
AppNL-G-F	12	0.00292184	0.081206	0.329349	0.311183	0.117415	0.0268163	0.0167749	0.000411834	0.0540079	0.0122216	0.0429265	0.00889048	0.0419374	0.054512	0.0431581	0.0101464	0.188941	0.166902	0.120174	0.579871	0.00906269	0.975713	0.477673	0.0179345	0.00385304	0.135846	0.000754924	0.0118926	0.0236691	0.0238061	0.0054217	0.0745015	0.239652	0.000428931	0.00756803	0.0054156
Control	12	0.00937839	0.0106073	0.00814294	0.0408465	0.0407809	0.0207036	0.00365501	0.0545911	0.0587119	0.134202	0.0130116	0.0863424	0.013479	0.0482751	0.0481175	0.0895005	0.0755539	0.0575546	0.00744251	0.131168	0.103261	0.000373564	0.304467	0.0170334	0.190875	0.247287	0.086327	0.0192468	0.020288	0.0299479	0.0134151	0.0985166	0.0183874	0.00204216	0.0276313	5.59588e-10
Control	12	0.00708689	0.0719623	0.10441	0.00188073	0.0944108	0.0113569	0.454391	0.191208	0.00972438	0.232223	0.144642	0.000223525	0.042706	0.203049	0.00146049	0.0704032	0.00825622	0.00170115	0.0362082	0.0998417	0.0229501	0.089363	0.132039	0.141653	0.108531	0.000703156	0.000490468	0.174886	0.0264455	0.00429891	0.00289287	0.000484098	0.123816	0.181552	0.0409722	0.197057
Control	12	0	0.0428269	0.040112	0.00537778	0.0941424	0.201963	0.0439229	0.11735	0.0868583	0.0528095	0.00385344	0.0010307	0.013532	0.0243549	0.108331	0.00909887	0.0962353	0.00642454	0.0030179	0.00113722	0.00367812	0.0108318	0.00732373	0.0439142	0.00350321	0.0989082	0.00111077	0.0196528	0.00265562	0.0032876	0.0101204	0.00307489	0.0146931	0.112282	0.122352	0.552543
Control	12	0.00166198	0.172973	0.0661929	0.385769	0.00457649	0.0565069	0.0172114	0.0523044	8.06905e-05	0.00759211	0.0193635	0.0258906	0.00503369	0.000159072	0.00254131	2.67508e-05	0.0884534	0.00447319	0.0377131	0.0400597	0.00723335	0.0116937	0.1233	0.00898433	0.0310178	0.00634323	0.00355583	0.0491286	0.000565413	0.0590635	0.00410668	0.0928457	0.000743354	0.29803	0.116094	0.566928
Control	12	0.00621959	0.128456	0.344505	0.336912	0.0596386	0.0968164	0.013995	0.0200311	0.021428	0.0225243	0.0555219	0.00432908	0.0701737	0.00360521	0.049827	0.0131068	0.0727463	0.00185952	0.0199139	0.0087577	0.000368399	0.056047	0.354584	0.00522017	0.0183369	0.0293175	0.0248132	0.00164933	0.00252337	0.00504777	0.0227421	0.0573601	0.0044551	0.328103	0.00825441	0.59212
Control	12	0	0.0470554	0.0596627	0.120563	0.0306298	0.0172904	0.0259633	0.101354	0.00720732	0.0395436	0.00989822	0.0996122	0.00671241	0.02594	0.0452553	7.79265e-05	0.0122968	0.000364502	0.0245476	0.0255608	0.00250968	0.00556423	0.00184863	0.00781467	0.0451283	0.0125653	0.00180257	0.000714567	0.0259456	0.00389962	0.0109947	0.0482959	0.0351716	0.0161154	0.0638663	0.110536
AppNL-G-F	12	0.00680625	0.00766456	0.0541649	0.00390625	0.00475105	0.00950192	0.155043	0.0145239	0.016438	0.0125835	0.00252229	0.0232967	0.00759757	1.19027e-05	0.0490609	0.0646598	7.53624e-07	0.00128757	0.0397559	0.0238751	0.0310257	0.057194	0.00111874	0.395098	0.0349622	0.12032	0.0491459	0.00190378	0.00509761	0.0341981	0.00111094	0.0153946	0.013133	0.208665	0.0661024	0.118236
AppNL-G-F	12	0.037461	0.00374775	0.122153	0.00936524	0.208253	0.145332	0.0123131	0.0179112	0.0731785	0.0149468	0.228962	0.00281807	0.206039	0.159626	0.0375463	0.0666288	0.00610904	0.000547817	0.0262776	0.0395019	0.0105623	0.0570042	9.58795e-05	0.630303	0.164183	0.130329	0.000887642	0.00330138	0.0206118	0.0842645	0.000892363	0.0134537	0.0260833	0.208728	0.206953	0.555497
AppNL-G-F	12	0.00378983	0.142864	0.469378	0	0.0162158	0.168916	0.232358	0.133493	0.0609604	0.104559	0.0145226	0.0305746	0.00715873	0.0343578	0.00698744	0.0511525	0.0447951	0.000840196	0.058301	0.000857559	0.00261762	0.000633059	0.00576699	0.0500776	0.129561	0.219069	0.132145	0.0605905	0.228388	0.137755	0.00256091	0.0658215	0.0611677	0.151564	0.246659	0.272585
AppNL-G-F	12	0.0618188	0.0683268	0.378016	0	0.27684	0.493665	0.500976	0.225172	0.115749	0.122617	0.0635068	1.36622e-06	0.00563536	0.000879286	0.00386513	0.000552194	0.00767489	1.66222e-05	0.0261444	0.100615	0.0037202	0.0365166	0.0325278	0.0155162	0.101724	0.010508	0.0241502	0.0354956	0.484457	0.0244931	0.00892662	0.360227	0.0962833	0.113482	0.286025	0.174434
AppNL-G-F	12	0.0341612	0.10143	0.0561183	0.0064	0.00805516	0.038587	0.015313	0.111585	0.0476416	0.0271258	0.00121064	0.0778719	0.00186775	0.000320357	0.0416605	0.00454857	0.009901	0.000831161	0.00157563	0.0024722	0.0475178	0.00557404	0.000572648	0.163853	0.0501879	0.00029387	0.00160028	0.00952566	0.204572	0.00104944	0.000167995	0.000857086	0.00818262	0.0327569	0.0270535	0.128822

## Sheet: Appendix 1—figure 3B
		Squared prediction error across trials (Latent state model)
Genotype	Age	1	2	3	4	5	6	7	8	9	10	11	12	13	14	15	16	17	18	19	20	21	22	23	24	25	26	27	28	29	30	31	32	33	34	35	36
AppNL-G-F	6	0	0.339066	0.0414034	0.0361247	0.0167483	0.0284442	0.0116978	0.00198629	0.0270878	0.000136937	0.00318474	0.0064249	0.0247062	0.000271606	0.0269743	0.0656406	0.00988389	0.0346139	0.00120059	0.00110366	0.0610146	0.0989188	0.0121849	0.0265183	0.00405101	0.00322857	0.000434316	0.0103364	0.00846794	0.0240326	0.0257269	0.00634899	1.19491e-05	0.00436023	0.0568447	0.00436332
AppNL-G-F	6	0	0.000688414	0.531408	0.0294214	0.169645	0.117383	0.0445317	0.0310655	0.0342863	0.0086949	0.00740394	0.0066199	0.00216901	2.61994e-07	0.0388128	0.0026144	0.076397	0.0157489	0.0355229	0.0255894	0.0576968	0.00359868	0.017572	0.11038	0.0070037	0.0114197	0.016362	0.0179098	5.46571e-06	0.00438044	0.00716446	0.0083989	0.000204849	0.000115744	0.028939	0.0794062
AppNL-G-F	6	0.00147929	7.83541e-05	0.0902887	0.0682665	0.18525	0.126423	0.0364748	0.00251235	0.135729	0.134684	0.197935	0.0595145	0.0662903	0.177571	0.0322483	0.117985	0.0771014	0.0553975	0.0424279	0.000128192	0.0963175	0.00812617	0.00523849	0.167816	0.000309481	0.0319359	0.0474991	0.00129823	0.00736058	0.120444	0.0832936	0.00801742	0.10775	0.0148055	0.138497	0.000142531
AppNL-G-F	6	0.041044	0.557687	0.74625	0.00984423	0.0690166	0.0753997	0.166945	0.0407399	0.00130884	0.00388518	0.00459378	0.00338922	0.0106602	0.0183365	0.00519283	0.0344035	0.0178838	0.00565651	0.00689723	0.188628	0.0839523	0.00157945	0.00799049	0.0474726	0.053983	0.00104927	0.000707631	0.0074503	0.0600754	8.68771e-05	0.117276	0.0582094	0.0332163	0.0775865	0.0725944	0.0122595
AppNL-G-F	6	0	0.0349784	0.0804022	0.00131212	0.0125466	0.0382948	0.0319772	0.125252	0.0639825	0.0194502	0.0938422	0.0110081	0.0313028	8.39658e-05	0.0964121	0.0168831	0.0814999	0.00763696	0.00497847	0.0334468	0.0139299	0.061166	0.0338128	0.036428	0.0211354	0.0194301	0.00180762	0.0311785	0.00132891	0.00558694	0.0214215	0.0031273	0.016477	0.0182691	0.0842664	0.0374127
AppNL-G-F	6	0.0121435	0.00429781	0.00103661	0	0.0912676	0.137084	0.00425161	0.0126706	0.000432017	0.0053883	0.0455442	0.0388871	0.0233444	0.0129389	0.0274933	0.0249889	0.00414299	0.00509165	0.00491163	0.00511654	0.0100574	0.00119103	0.00402573	0.0262125	0.023226	0.0207794	0.0261961	0.000872985	0.0165989	0.00252076	0.00664355	0.00150189	0.00128808	0.0082408	0.0194319	0.00745485
AppNL-G-F	6	0.0121435	0.000771144	0.0396217	0.00294592	0.000163805	0.00652515	0.00269159	0.103366	0.0139958	0.0185468	0.0383597	0.114521	0.012437	0.0388079	0.0327343	0.0178039	0.0862738	0.0831932	0.035443	0.121427	0.00148572	0.0119809	0.191138	7.14328e-05	0.0250268	0.113107	0.132138	0.141589	0.198339	0.133307	0.200752	0.178746	0.136815	0.00619505	0.0523492	0.0527065
AppNL-G-F	6	0.207462	0.161836	0.215819	0.0659716	0.138884	0.0161882	0.00305307	0.0105376	0.0344706	0.158688	0.0139467	2.04691e-06	0.000320661	0.000601036	0.0363864	0.0127784	0.00202917	0.00896435	0.000673496	0.00107391	0.00151462	0.0258995	2.71905e-05	0.0626593	0.0523592	0.0430608	0.00198122	0.00527354	0.00581324	0.00631859	0.028236	0.000917062	0.00106943	0.0240069	0.0493967	5.88808e-05
AppNL-G-F	6	0.0269668	0.000274759	0.0697154	0.0100983	0.101937	0.0159526	0.150244	0.0583784	0.0360532	0.0942675	0.00492769	0.000854099	0.00806011	0.00819537	0.0011805	0.00719907	0.00698448	0.000995015	0.0786959	0.010625	9.2093e-05	0.00194181	0.0185974	0.0070604	0.0368583	0.0213899	0.0100556	0.0114283	0.00349117	0.00857016	0.00208381	0.0145315	0.00287292	0.0148505	0.100612	0.0069017
Control	6	0.0016	0.432976	0.39468	0.0221255	0.0470226	0.140669	0.0905118	0.119982	0.0871641	0.128796	0.0711459	0.0372688	0.00960985	0.000180755	0.0161333	0.0126511	0.000373486	0.0155291	0.0110385	0.00142485	0.0168707	0.0371106	0.000573831	0.0113271	0.00606224	0.00192689	0.195788	0.00129679	0.00655892	0.000720391	0.0118553	0.0448745	0.00354943	3.8963e-05	0.022457	0.00638881
AppNL-G-F	6	0	0.168491	0.428529	0.0124713	0.0601014	0.000903032	0.0116414	0.0406252	0.00308216	0.0413467	0.00105082	0.000751875	0.0438281	0.017443	0.140392	0.00135979	0.0186766	0.000316319	0.000558357	0.0427556	0.00797818	0.0221691	0.000451851	0.171496	0.0335958	0.00054133	0.00658945	0.104615	0.00238438	0.00687664	0.199099	0.0735622	9.47644e-05	0.0909257	0.0831698	0.0403622
Control	6	0	0.0517152	0.0445664	0	0.153966	0.00204974	0.0170195	0.0848553	0.143673	0.0653747	0.139005	0.00758816	0.16024	0.0696998	0.0298769	0.00702377	0.0764223	0.0127156	0.0408336	0.0130556	0.0131225	0.0332554	0.186104	0.0139371	0.00869978	0.024809	0.0155963	0.0150018	0.0144732	0.100319	0.000499502	0.126333	0.0499295	0.00914465	0.130181	0.0598717
Control	6	0	0.812689	0.464876	0.0867028	0.0973911	0.035423	0.0888367	0.037822	0.082383	0.066438	0.0523016	0.18411	0.0301161	0.00664735	0.000167839	0.00331436	0.0552074	0.0404334	0.000823369	0.0964555	0.103234	0.0178606	0.0408768	0.0338492	0.00528588	0.0945241	0.0141824	0.054935	0.00592419	3.44028e-05	0.0322433	0.0220847	3.52424e-05	0.00307861	0.0216063	0.0116288
AppNL-G-F	6	0	0.00110203	0.58222	0.0242432	0.000386034	0.0324418	0.0214855	0.00803133	0.00748022	0.0352599	0.178031	0.000228622	0.040954	0.000949141	0.0181317	0.0696839	0.0168123	0.0281252	0.0802537	0.0465349	0.0516184	0.0455468	0.00849915	0.0182937	0.0199953	0.0414218	0.0179617	0.0247708	0.0194184	0.000102646	0.0116195	0.0194351	0.00430923	0.0851914	0.0317848	0.0631775
AppNL-G-F	6	0	0.00513992	0.0800573	0.0575352	0.0132596	0.000836971	0.00037901	0.111094	0.0427663	0.00603884	0.0230122	0.0034705	0.00550122	0.00250863	0.0620327	7.5072e-06	0.000602012	0.02258	0.0144897	0.0205802	0.0501506	0.139019	0.0393499	0.0303167	0.110709	0.00286912	0.0447931	0.0656976	0.16996	0.100062	0.00263103	0.000115835	0.0379263	0.0911133	0.134271	0.00281652
Control	6	0.0011939	0.00442595	0.0883271	0.0161857	0.0438603	0.161466	0.136956	0.0332234	0.0169528	0.0230421	0.030635	0.0205478	0.0151626	0.00478677	0.0283756	0.0420744	5.55725e-07	0.00463053	0.00719334	0.010848	0.00149978	0.00197292	0.00054533	0.000685318	0.0504762	0.00237416	0.00178799	0.00137062	0.0153531	2.94901e-05	0.0498731	0.000129333	0.000371476	0.00220096	0.0244455	0.0413114
Control	6	0	0.707187	0.223063	0.0106401	0.109808	0.0369829	0.000922304	0.167149	0.0858493	0.131938	0.0157051	0.00198284	0.0050971	0.0443049	0.10831	0.0466742	0.00861514	0.000382909	0.0100853	0.0346798	0.00124795	0.061691	0.0290806	0.0600467	0.119867	0.169022	0.00117295	0.0341472	0.00507816	0.0102392	1.05096e-06	0.0220472	4.94226e-06	0.000365978	0.0305341	0.0237812
Control	6	0.000822189	0.0143397	0.00998153	0.000928174	0.0221765	0.00881364	0.0166806	0.0021928	0.0398852	0.00846793	0.0213232	0.0462104	0.00365736	0.0549943	0.0124542	0.0741877	0.0107987	0.00334362	0.0549617	0.103632	0.169456	0.0761862	0.084888	0.0551581	0.0788613	0.00193573	0.00210456	0.0830825	0.0297615	0.0423779	0.000223898	0.0338099	0.145326	0.0430209	0.016383	0.00698789
AppNL-G-F	6	0.111498	0.93553	0.431672	0	0.0171934	0.0879919	0.012015	0.0325474	0.0443566	0.0021773	0.00077047	0.000493669	0.00341287	0.00393318	0.0390697	7.66159e-06	0.0348661	0.00211139	0.00583006	0.00436033	0.00112041	0.00329843	0.00843105	0.0975052	0.00299561	0.09281	0.0419101	0.011296	0.00422674	0.0515379	0.0523686	0.0100126	0.0604742	0.00266848	0.120924	0.0426109
Control	12	0.00214568	0.00326438	0.00056875	0.0286259	0.00208159	0.00394064	0.0215623	0.00952112	0.0184093	0.00387366	0.000181791	0.00271214	0.0261372	0.0182706	0.0232274	0.00010115	5.54788e-05	0.000342797	0.00453768	0.00173408	0.0014316	0.00312941	0.0145144	0.000511814	0.00409785	0.00152346	0.0108284	0.00299612	0.0096323	0.00908495	0.00213873	0.00808212	0.00168011	0.00102965	0.0711647	0
Control	12	0.391529	0.0846674	0	0.017381	0.022101	0.00046126	0.0172135	0.000529163	0.0114439	0.0012153	0.00915444	0.000553926	0.0115456	0.00219462	0.00125081	0.000570177	0.00925388	0.00926476	0.00927393	0.00928069	0.00515215	0.00222186	8.02207e-07	0.0213996	3.34278e-06	0.0121647	0.00588749	0.0303181	0.0233153	0.00107476	0.00493171	0.00921192	0.105872	0.00835525	0.0432706	0.0098053
Control	12	0.0277778	0.425007	0	0.076312	0.1972	0.0208676	0.000974106	0.0432172	0.0429884	0.0265301	0.0264124	0.0225752	0.00910246	0.0112332	0.00384253	0.0225228	0.000733603	0.0166845	0.000306287	0.028931	0.00723431	0.0409653	0.0118541	0.00335944	0.00777367	0.00311614	0.134922	0.0966267	0.00207603	0.00107331	0.0127309	0.000413641	0.00756013	0.00046781	0.0360573	0.0141127
Control	12	0.00108778	0.97654	0.379573	0.0619897	0.0266633	0.0016978	0.00773148	0.19762	0.00295192	0.0980274	0.0309725	0.00377558	0.00597442	0.00862042	0.0274819	0.00836335	0.0354262	0.049937	0.000418347	0.00159889	0.0080585	0.0113343	0.0525312	0.0873142	0.0687341	0.000324254	0.00213272	0.0939387	0.0109736	8.98034e-05	0.172672	0.00649169	0.0174379	0.00155745	0.136254	0.0303782
AppNL-G-F	12	0.003025	0.00931489	0.448826	0.00321111	0.0133634	0.0640725	0.000662134	0.0809241	0.20025	0.0559827	0.00345926	0.0467471	0.000400135	0.104038	0.0197402	0.0489096	0.00310929	0.000802538	0.0122183	0.0274652	0.00505406	0.0200436	0.153964	0.0178373	0.188969	0.0274288	0.00131738	0.00203246	0.00509082	0.000413564	0.00322779	0.0360066	0.0836195	0.0774953	0.0172435	0.0337364
AppNL-G-F	12	0.0140383	0.000839588	0.0920015	0.00351811	0.0693176	0.169552	0.0927783	0.0376996	0.00859955	0.0390908	0.179104	0.180011	0.00570393	0.0407411	0.0586444	0.0187879	0.0801339	0.0190789	0.0129006	1.98039e-05	0.013092	0.016227	0.0238742	0.158425	0.0912836	0.0048992	7.83217e-06	0.0373082	0.0723099	0.0732734	0.00111298	0.0657975	0.0582732	0.0734769	0.0709225	0.0346532
AppNL-G-F	12	0	0.218828	0.003356	0.0481174	0.0219886	0.165728	0.0772713	0.133043	0.00174194	0.00152525	0.0179026	0.0718983	0.0120369	0.00260467	0.0488099	0.00204117	0.000449359	0.000711241	0.00406469	0.000316438	0.00941538	0.0201775	0.0274068	0.00443107	0.0319662	0.144382	0.0562103	0.181632	1.94516e-05	0.000141733	0.000260386	0.0217039	0.000101043	0.0429372	0.0338653	0.0341498
AppNL-G-F	12	0	0.0171325	0.0665973	0.00224843	0.0337825	0.103684	0.15734	0.101075	0.0891629	0.162799	0.0444907	0.0997154	0.0663965	0.0239371	0.0501781	0.177965	0.0205081	0.0509271	0.00373613	0.00371767	0.0606077	0.000175555	0.0315642	0.000144368	0.159538	0.124788	0.0365644	0.0281164	0.117412	0.00542375	0.145608	0.0195064	0.0355082	0.00637432	0.138774	0.00732048
AppNL-G-F	12	0.00180625	0.974578	0.316406	0.00314958	0.000214455	0.198879	0.112159	0.133883	0.0221122	0.149408	0.00420736	0.0141082	0.0653176	0.00202968	0.000848062	0.0150995	0.0776079	0.015288	0.00819562	0.000279816	0.0539403	9.25985e-05	0.000268203	0.0204702	0.0151486	0.0281311	0.0287806	0.0644565	0.00461683	0.0048107	0.0127993	0.0180325	9.36094e-05	0.0513092	0.107225	0.028236
Control	12	0	0.0147565	0.00756404	0.00306736	0.150361	0.144648	0.166315	0.0892648	0.0883554	0.0134456	0.00178559	4.85543e-05	0.000129109	0.00794752	0.000730353	3.68239e-05	0.00283282	0.00011179	0.0021676	0.000210007	0.000940345	0.00511212	0.00486803	0.0288275	0.096717	0.0976403	0.000946347	0.000727481	0.00036865	0.00058894	0.000527492	0.00676404	0.00478084	3.70827e-05	0.0800952	0.0265959
Control	12	0.0046337	0.838531	0.868491	0.0139687	0.179107	0.104516	0.0792764	0.0330713	1.61895e-06	0.0302266	0.00943591	0.00176084	0.00012744	0.00211713	0.00209205	0.0152063	0.0149289	0.00860553	0.000646185	0.0113546	0.01494	0.00701331	0.00228342	0.0455148	0.0674161	0.000367276	0.000219241	0.000117928	0.000347838	0.00244505	0.00155424	0.00303143	1.59556e-05	0.0117626	0.00818701	0.0464829
Control	12	0	0.0739359	0.203713	0.0385949	0.0118416	0.0222571	0.147424	0.0624343	0.120801	0.00188824	0.00793479	0.0032696	0.000702598	0.00216317	0.000445844	0.00856785	0.00277987	0.000241398	0.00713698	0.000867555	0.0243527	0.000501194	5.6755e-05	0.0637396	0.0442965	0.0289175	0.0582118	0.0253216	0.0660258	0.0219297	0.0115615	0.00448032	0.0151256	0.00237023	0.023934	0.093025
AppNL-G-F	12	0.00580834	0.0008212	0.0288316	0.0367435	0.0907419	0.0573406	0.0336693	0.0334258	0.048599	0.0263619	0.0111043	0.00704587	0.0600923	0.000249299	0.0181126	0.0137671	0.0874835	0.112887	0.0469875	0.00137668	0.0872427	0.000903788	0.0738913	0.00740492	0.0942104	0.0075662	0.0628332	0.0110532	0.0629231	0.101299	0.0308989	0.0105562	0.000191506	0.084121	0.086036	0.0414769
AppNL-G-F	12	0.00475624	0.397142	0.222524	0.0871597	0.0966658	0.0392486	0.0840339	0.0991082	0.00959689	0.0274907	0.000349749	0.000390267	0.000187039	0.0583666	0.00487233	0.00132266	8.98417e-05	0.03939	0.00279749	0.0454604	0.0790285	0.0115868	0.00690961	0.0883119	0.000935472	0.00309312	0.016748	0.050707	0.0145126	0.13001	0.0719528	0.00133854	0.0108631	0.0162577	0.151058	0.00773528
AppNL-G-F	12	0	0.548239	0.381924	0.0182474	0.0932237	0.00553899	0.000893525	0.0134271	0.0046004	0.0324858	0.031797	0.0257317	0.0668324	8.75575e-05	0.0210888	0.0411814	0.0619522	0.000233422	0.00950083	1.86619e-05	0.0740375	0.0433209	0.0577851	0.0983162	0.0838445	0.000389177	0.000324217	0.00104414	0.0386645	0.012761	0.0150532	0.0200687	0.043277	0.00153744	0.0622307	0.000254901
Control	12	0	0.0715287	0.151708	0.00444444	0.00723427	0.00290421	0.00375474	0.0306188	9.27188e-05	0.0490208	0.0431471	0.108	0.0712263	0.0461422	0.0148136	0.184705	0.164518	0.00362016	0.0464843	0.101077	0.117677	0.0660663	0.0747845	0.124923	0.0202622	0.0461543	0.0588892	0.0104456	0.00030771	0.0115479	0.0369007	0.0609366	0.00585897	0.00125571	0.11449	0.0881272
Control	12	0.00937839	0.0116718	0.251649	0.0408465	0.0130551	0.00598268	0.000183569	0.0420036	0.0531196	0.136992	0.0175027	0.105892	0.0255925	0.0755895	0.0812333	0.140187	0.128822	0.0218449	0.000174209	0.0655297	0.0437026	0.0188121	0.183996	0.00416843	0.133576	0.177133	0.0453039	0.050109	0.0535091	0.0704087	0.0445995	0.169737	0.0557808	0.0109575	0.0346678	0.00526978
Control	12	0.00708689	0.00205132	0.308792	0.00188073	0.0740861	0.157062	0.10527	0.00886968	0.047765	0.038133	0.0154868	0.0581725	7.2973e-05	0.0778467	0.01177	0.15111	0.000115207	0.0150047	0.0163877	0.0736541	0.0322594	0.0971751	0.133099	0.035193	0.0567225	0.00113741	0.00583575	0.130291	0.0509872	0.0183408	0.000514218	0.00368392	0.0693762	0.0725961	0.0431567	0.00312684
AppNL-G-F	12	0.00680625	0.0557573	0.294306	0.0358148	0.0750649	0.0989218	0.00126746	0.182437	0.150018	0.107255	0.0506969	0.0842776	0.0362666	0.0046316	0.0321625	0.0572387	8.39941e-05	0.00477402	0.0645331	0.052433	0.0723286	0.121735	0.0252418	0.0852617	0.00115443	0.033574	0.157342	0.0524755	0.0710158	0.151244	0.031974	0.118146	0.116372	0.00511988	0.0602287	0.0523857
AppNL-G-F	12	0.037461	0.166535	0.394274	0.00740297	0.109144	0.00155128	0.185535	0.166144	0.00165731	0.00465007	0.104282	0.00513942	0.12691	0.106028	0.0197626	0.0860526	0.00341027	0.00089973	0.0248399	0.045126	0.0153489	0.0706076	0.00169333	0.0665983	0.108519	0.100795	0.00506469	0.00955971	0.033181	0.0645665	1.1116e-05	0.0212459	0.0183623	0.0278549	0.185732	0.00331818
AppNL-G-F	12	0.0341612	0.893221	0.290856	0.0309147	0.14616	0.0743151	0.0785103	7.51911e-05	0.00474103	0.00523783	0.0248198	0.0159957	0.00550226	0.00468552	0.0210483	0.0105036	0.00730417	0.00109811	0.000376656	0.000242275	0.0295282	0.0171947	0.00796273	0.135456	0.0391661	0.00239887	0.00592443	0.00315954	0.165753	0.00652252	0.00409672	0.000574972	0.0211717	0.0246834	0.026893	0.00728125
