# Supplementary material for: Misclassification in memory modification in AppNL-G-F knock-in mouse model of Alzheimer’s disease
Source: eLife. 2025 Nov 4;14:RP105347. doi: 10.7554/eLife.105347 (PMC12585179; doi:10.7554/eLife.105347)
Supplement: Appendix 1—figure 4—source data 1. [file elife-105347-app1-fig4-data1.xlsx]

## Sheet: Appendix 1—figure 4A
All data are included in Appendix 1—figure 3A

## Sheet: Appendix 1—figure 4B
All data are included in Appendix 1—figure 3B
