# Supplementary material for: Misclassification in memory modification in AppNL-G-F knock-in mouse model of Alzheimer’s disease
Source: eLife. 2025 Nov 4;14:RP105347. doi: 10.7554/eLife.105347 (PMC12585179; doi:10.7554/eLife.105347)
Supplement: Appendix 1—figure 5—source data 1. [file elife-105347-app1-fig5-data1.xlsx]

## Sheet: Appendix 1—figure 5
		Latent states acquired during acquisition phase		Latent states acquired during extinction phase		Latent states acquired after extinction phase					Latent states acquired during acquisition phase		Latent states acquired during extinction phase		Latent states acquired after extinction phase
		Appendix 1—figure 5A		Appendix 1—figure 5B		Appendix 1—figure 5C					Appendix 1—figure 5D		Appendix 1—figure 5E		Appendix 1—figure 5F
Genotype	Age	L	P	L	P	L	P		Genotype	Age	L	P	L	P	L	P
AppNL-G-F	6	2	0.946049	0	0	1	0.0539513		Control	12	1	1	0	0	1	1.59183e-70
AppNL-G-F	6	1	1	0	0	0	0		Control	12	2	0.999778	0	0	1	0.000221703
AppNL-G-F	6	2	0.81916	0	0	1	0.18084		Control	12	2	0.93377	0	0	1	0.0662298
AppNL-G-F	6	2	0.848266	0	0	1	0.151734		Control	12	2	0.931386	0	0	1	0.0686142
AppNL-G-F	6	1	0.956307	0	0	1	0.0436929		AppNL-G-F	12	1	1	0	0	0	0
AppNL-G-F	6	1	1	0	0	1	3.13884e-11		AppNL-G-F	12	2	1	0	0	0	0
AppNL-G-F	6	1	1	0	0	0	0		AppNL-G-F	12	2	0.94711	0	0	1	0.0528904
AppNL-G-F	6	3	1	0	0	1	2.54655e-07		AppNL-G-F	12	2	0.97398	0	0	1	0.0260196
Control	6	2	0.975418	0	0	1	0.0245819		AppNL-G-F	12	2	0.666381	1	0.333198	1	0.00042113
AppNL-G-F	6	2	0.948738	0	0	1	0.0512617		Control	12	2	1	0	0	1	2.57566e-45
Control	6	1	1	0	0	0	0		Control	12	2	0.985195	0	0	1	0.0148054
Control	6	1	1	0	0	0	0		Control	12	2	1	0	0	1	4.78696e-136
AppNL-G-F	6	2	0.873378	0	0	1	0.126622		AppNL-G-F	12	1	1	0	0	0	0
AppNL-G-F	6	2	0.915988	0	0	1	0.0840117		AppNL-G-F	12	2	1	0	0	0	0
Control	6	1	1	0	0	1	0		AppNL-G-F	12	2	0.838476	0	0	1	0.161524
Control	6	1	0.953201	0	0	1	0.0467994		Control	12	1	1	0	0	0	0
Control	6	2	0.973987	0	0	1	0.0260129		Control	12	1	1	0	0	0	0
AppNL-G-F	6	1	1	0	0	0	0		Control	12	2	0.943117	0	0	1	0.0568835
		2	0.999851	0	0	1	0.000149087		AppNL-G-F	12	2	0.844613	0	0	1	0.155387
									AppNL-G-F	12	2	0.974704	0	0	1	0.025296
									AppNL-G-F	12	2	0.97104	0	0	1	0.0289604
