# Supplementary material for: Misclassification in memory modification in AppNL-G-F knock-in mouse model of Alzheimer’s disease
Source: eLife. 2025 Nov 4;14:RP105347. doi: 10.7554/eLife.105347 (PMC12585179; doi:10.7554/eLife.105347)
Supplement: Appendix 1—figure 6—source data 1. [file elife-105347-app1-fig6-data1.xlsx]

## Sheet: Appendix 1—figure 6
		Discrimination index (DI) calculated from simulated CR
Genotype	Age	Test 2 vs Test 1	Test 3 vs Test 2	Test 3 vs Test 1
AppNL-G-F	6	0.0753819	0.870393	0.3538
AppNL-G-F	6	0.105455	0.499956	0.105438
AppNL-G-F	6	0.423357	0.599673	0.523756
AppNL-G-F	6	0.315224	0.662272	0.474429
AppNL-G-F	6	0.165122	0.856131	0.540641
AppNL-G-F	6	0.0190486	0.97937	0.479673
AppNL-G-F	6	0.286507	0.499252	0.285895
AppNL-G-F	6	0.01603	0.97833	0.42379
AppNL-G-F	6	0.257804	0.659184	0.401851
Control	6	0.0381441	0.927311	0.33595
AppNL-G-F	6	0.170864	0.484062	0.162018
Control	6	0.340924	0.499848	0.340788
Control	6	0.270593	0.695282	0.458424
AppNL-G-F	6	0.133363	0.805636	0.389445
AppNL-G-F	6	0.00721939	0.992379	0.486371
Control	6	0.191796	0.845242	0.564483
Control	6	0.163017	0.782477	0.411979
Control	6	0.254746	0.494189	0.250357
AppNL-G-F	6	0.00570126	0.9873	0.308317
Control	12	0.274435	0.923913	0.821201
Control	12	0.00824242	0.989826	0.447076
Control	12	0.344613	0.635808	0.478616
Control	12	0.255227	0.701691	0.446317
AppNL-G-F	12	0.190253	0.448827	0.160599
AppNL-G-F	12	0.371058	0.465873	0.339752
AppNL-G-F	12	0.0419316	0.925781	0.35314
AppNL-G-F	12	0.206645	0.733465	0.417512
AppNL-G-F	12	0.00367826	0.988953	0.24841
Control	12	0.398488	0.679161	0.583741
Control	12	0.0166604	0.968678	0.34382
Control	12	0.451092	0.602282	0.554464
AppNL-G-F	12	0.186724	0.439066	0.152336
AppNL-G-F	12	0.417058	0.486808	0.404284
AppNL-G-F	12	0.458152	0.589146	0.548014
Control	12	0.190569	0.501097	0.191247
Control	12	0.259227	0.465077	0.233275
Control	12	0.269176	0.684965	0.444696
AppNL-G-F	12	0.415062	0.604458	0.520238
AppNL-G-F	12	0.469941	0.579878	0.550302
AppNL-G-F	12	0.126446	0.808698	0.379614
