# Supplementary material for: Misclassification in memory modification in AppNL-G-F knock-in mouse model of Alzheimer’s disease
Source: eLife. 2025 Nov 4;14:RP105347. doi: 10.7554/eLife.105347 (PMC12585179; doi:10.7554/eLife.105347)
Supplement: Figure 1—source data 1. [file elife-105347-fig1-data1.xlsx]

## Sheet: Figure 1C
	CR
Trial	2 m.o._obs	2 m.o._sim
1	0.0909091	0.0282358
2	0.121818	1
3	0.832727	1
4	0.94	1
5	0.94	0.999997
6	0.889091	0.997942
7	0.893818	0.999999
8	0.905818	0.999223
9	0.812	0.985371
10	0.772364	0.937913
11	0.672364	0.860802
12	0.621091	0.771707
13	0.6	0.684289
14	0.648364	0.605322
15	0.6	0.536969
16	0.576	0.479031
17	0.554545	0.430344
18	0.527273	0.389489
19	0.563636	0.355112
20	0.548364	0.326042
21	0.517818	0.301308
22	0.487636	0.280121
23	0.426909	0.261851
24	0.296727	0.313627
25	0.305818	0.265861
26	0.351273	0.236571
27	0.330182	0.215709
28	0.3	0.199772
29	0.309091	0.187068
30	0.288	0.176639
31	0.203273	0.167889
32	0.166667	0.160423
33	0	0.153964
34	0.121818	0.170417
35	0.292727	0.0598793
36	1	1

## Sheet: Figure 1D
	posterior probability of latent cause
Trial	z1	z2	z3	z4	z5	z6
1	1	0	0	0	0	0
2	0.329519	0.670481	0	0	0	0
3	0.198216	0.246505	0.555279	0	0	0
4	0.107666	0.109524	0.110486	0.672324	0	0
5	0.0836545	0.084492	0.0846907	0.108465	0.638698	0
6	0.0650036	0.0656262	0.0658062	0.0834117	0.221701	0.498452
7	0.0954763	0.0963576	0.0966438	0.12141	0.262846	0.327266
8	0.0758097	0.0764786	0.0767337	0.0955152	0.184363	0.4911
9	0.0631401	0.0636766	0.0639027	0.0789134	0.140879	0.589488
10	0.0543131	0.0547596	0.0549612	0.067391	0.113511	0.655064
11	0.0478047	0.048186	0.0483673	0.0589236	0.0948129	0.701906
12	0.0427985	0.0431306	0.0432948	0.0524309	0.0812809	0.737064
13	0.0388207	0.0391141	0.0392639	0.0472873	0.07106	0.764454
14	0.0355777	0.03584	0.0359775	0.0431063	0.0630814	0.786417
15	0.0328786	0.0331154	0.0332422	0.0396367	0.056688	0.804439
16	0.0305936	0.030809	0.0309265	0.036708	0.0514546	0.819508
17	0.0286315	0.0288287	0.028938	0.0342005	0.0470946	0.832307
18	0.0269263	0.0271079	0.02721	0.0320277	0.0434081	0.84332
19	0.0254291	0.0255972	0.0256927	0.0301253	0.0402513	0.852904
20	0.0241027	0.0242589	0.0243487	0.0284449	0.0375185	0.861326
21	0.0229185	0.0230642	0.0231487	0.0269489	0.0351303	0.868789
22	0.021854	0.0219904	0.0220702	0.0256079	0.0330256	0.875452
23	0.0209249	0.0210492	0.0211319	0.0243959	0.0311538	0.881344
24	0.0278121	0.0279401	0.0280132	0.0310244	0.0355524	0.849658
25	0.0245502	0.0246615	0.024726	0.0273397	0.031243	0.86748
26	0.0224251	0.0225252	0.022584	0.024933	0.0284168	0.879116
27	0.0208255	0.0209171	0.0209715	0.0231188	0.0262817	0.887885
28	0.0195406	0.0196253	0.0196761	0.02166	0.0245629	0.894935
29	0.018468	0.018547	0.0185947	0.0204417	0.0231264	0.900822
30	0.0175494	0.0176235	0.0176686	0.0193978	0.0218955	0.905865
31	0.0167479	0.0168177	0.0168605	0.018487	0.0208216	0.910265
32	0.0160387	0.0161047	0.0161454	0.0176809	0.0198716	0.914159
33	0.0154156	0.0154769	0.0155181	0.0169589	0.0190214	0.917609
34	0.0191579	0.0192197	0.0192614	0.0206606	0.0224717	0.899229
35	0.0218276	0.0218775	0.0219329	0.0231339	0.0247219	0.886506
36	0.0197679	0.0198166	0.0198442	0.0208741	0.0220499	0.897647

## Sheet: Figure 1E
	associative weight of CS							associative weight of context
Trial	w1	w2	w3	w4	w5	w6		w1	w2	w3	w4	w5	w6
1	0.635085	-0.00615385	-0.00615385	-0.00615385	-0.00615385	-0.00615385		0.122094	-0.00615385	-0.00615385	-0.00615385	-0.00615385	-0.00615385
2	0.706505	0.423785	-0.00615385	-0.00615385	-0.00615385	-0.00615385		0.136378	0.0798339	-0.00615385	-0.00615385	-0.00615385	-0.00615385
3	0.891532	0.854946	0.946279	-0.00615385	-0.00615385	-0.00615385		0.173383	0.166066	0.184333	-0.00615385	-0.00615385	-0.00615385
4	0.464505	0.439676	0.485595	0.000913587	-0.00615385	-0.00615385		0.087978	0.083012	0.092196	-0.00474036	-0.00615385	-0.00615385
5	0.438834	0.415136	0.458423	0.000915968	-0.00315159	-0.00615385		0.0828437	0.0781041	0.0867616	-0.00473988	-0.00555339	-0.00615385
6	0.41999	0.397142	0.438494	0.000917668	-0.00255009	-0.00381083		0.079075	0.0745052	0.0827757	-0.00473954	-0.0054331	-0.00568524
7	0.393505	0.371869	0.410501	0.000920005	-0.00194163	-0.0027801		0.0737778	0.0694507	0.077177	-0.00473908	-0.0053114	-0.0054791
8	0.373804	0.35309	0.389696	0.000921696	-0.00158911	-0.00156847		0.0698377	0.0656948	0.0730162	-0.00473874	-0.0052409	-0.00523677
9	0.358219	0.338245	0.373251	0.000923004	-0.00135261	-0.000586931		0.0667207	0.062726	0.0697271	-0.00473848	-0.0051936	-0.00504046
10	0.345373	0.326018	0.359705	0.000924063	-0.00117982	7.81515e-05		0.0641515	0.0602805	0.0670179	-0.00473826	-0.00515904	-0.00490745
11	0.334473	0.315648	0.348218	0.000924948	-0.00104635	0.000481754		0.0619715	0.0582066	0.0647204	-0.00473809	-0.00513235	-0.00482673
12	0.325023	0.306663	0.338264	0.000925705	-0.000939104	0.00070864		0.0600816	0.0564095	0.0627298	-0.00473794	-0.0051109	-0.00478135
13	0.316695	0.298747	0.329497	0.000926363	-0.00085039	0.000829138		0.0584159	0.0548263	0.0609762	-0.0047378	-0.00509315	-0.00475725
14	0.309258	0.291681	0.321671	0.000926945	-0.000775342	0.000890365		0.0569286	0.0534132	0.0594112	-0.00473769	-0.00507815	-0.004745
15	0.302548	0.285308	0.314614	0.000927465	-0.000710716	0.00092039		0.0555864	0.0521385	0.0579996	-0.00473758	-0.00506522	-0.004739
16	0.296439	0.279508	0.308192	0.000927933	-0.000654258	0.000934688		0.0543648	0.0509785	0.0567153	-0.00473749	-0.00505393	-0.00473614
17	0.290838	0.274192	0.302306	0.000928359	-0.000604345	0.000941332		0.0532446	0.0499153	0.0555381	-0.00473741	-0.00504395	-0.00473481
18	0.285671	0.269288	0.296877	0.000928749	-0.000559772	0.000944354		0.0522111	0.0489346	0.0544524	-0.00473733	-0.00503503	-0.00473421
19	0.280878	0.264741	0.291844	0.000929108	-0.000519629	0.000945704		0.0512525	0.0480251	0.0534457	-0.00473726	-0.005027	-0.00473394
20	0.276411	0.260505	0.287155	0.00092944	-0.000483208	0.000946298		0.0503592	0.0471779	0.052508	-0.00473719	-0.00501972	-0.00473382
21	0.272232	0.256542	0.282769	0.000929749	-0.000449953	0.000946555		0.0495233	0.0463853	0.0516308	-0.00473713	-0.00501307	-0.00473377
22	0.268307	0.252821	0.278652	0.000930037	-0.000419417	0.000946666		0.0487384	0.0456411	0.0508072	-0.00473707	-0.00500696	-0.00473374
23	0.236787	0.222957	0.245608	0.000932314	-0.000185769	0.000946746		0.0424343	0.0396683	0.0441985	-0.00473661	-0.00496023	-0.00473373
24	0.232445	0.218851	0.241071	0.000932611	-0.000159115	0.000946746		0.0415659	0.038847	0.0432911	-0.00473655	-0.0049549	-0.00473373
25	0.228682	0.215293	0.23714	0.000932867	-0.000136242	0.000946746		0.0408134	0.0381355	0.042505	-0.0047365	-0.00495033	-0.00473373
26	0.225302	0.212097	0.233609	0.000933096	-0.000115869	0.000946746		0.0401372	0.0374963	0.0417987	-0.00473646	-0.00494625	-0.00473373
27	0.222208	0.209173	0.230379	0.000933305	-9.73814e-05	0.000946746		0.0395186	0.0369115	0.0411527	-0.00473642	-0.00494255	-0.00473373
28	0.219346	0.206468	0.227391	0.000933497	-8.04032e-05	0.000946746		0.0389462	0.0363705	0.040555	-0.00473638	-0.00493916	-0.00473373
29	0.216676	0.203944	0.224603	0.000933677	-6.46779e-05	0.000946746		0.0384122	0.0358658	0.0399975	-0.00473634	-0.00493601	-0.00473373
30	0.21417	0.201576	0.221987	0.000933845	-5.00175e-05	0.000946746		0.0379109	0.0353921	0.0394743	-0.00473631	-0.00493308	-0.00473373
31	0.211806	0.199342	0.21952	0.000934002	-3.62782e-05	0.000946746		0.0374381	0.0349454	0.0389809	-0.00473628	-0.00493033	-0.00473373
32	0.209567	0.197227	0.217184	0.000934152	-2.33465e-05	0.000946746		0.0369903	0.0345224	0.0385137	-0.00473625	-0.00492775	-0.00473373
33	0.191176	0.179858	0.198001	0.000935368	8.12173e-05	0.000946746		0.0333122	0.0310485	0.0346771	-0.004736	-0.00490683	-0.00473373
34	0.17054	0.160389	0.176515	0.000936695	0.000190441	0.000946746		0.0291849	0.0271547	0.0303799	-0.00473574	-0.00488499	-0.00473373
35	0.17054	0.160389	0.176515	0.000936695	0.000190441	0.000946746		0.0543388	0.0523762	0.0556487	0.0221009	0.0237889	0.923328
36	0.168257	0.158233	0.174144	0.000865517	0.000120989	-0.10511		0.0538823	0.0519451	0.0551747	0.0220866	0.023775	0.902116
