# Supplementary material for: Misclassification in memory modification in AppNL-G-F knock-in mouse model of Alzheimer’s disease
Source: eLife. 2025 Nov 4;14:RP105347. doi: 10.7554/eLife.105347 (PMC12585179; doi:10.7554/eLife.105347)
Supplement: Figure 2—source data 1. [file elife-105347-fig2-data1.xlsx]

## Sheet: Figure 2B
	Median freezing%
	6 m.o. Control		6 m.o. AppNL-G-F		12 m.o. Control		12 m.o. AppNL-G-F
Trial	preCS	CS	preCS	CS	preCS	CS	preCS	CS
1	0	1.7	1.7	6.7	1.7	3.3	1.7	6.7
2	1.7	5	2.5	12.5	4.6	3.3	3.3	7.5
3	7.5	17.95	16.7	20.8	10.4	14.6	16.7	21.7
4	19.15	36.65	27.5	48.3	17.5	36.7	40.8	45.8
5	9.55	34.2	20.8	36.7	15.8	29.15	27.5	40
6	12.95	38.75	14.2	40.8	12.5	34.15	17.5	35
7	9.2	32.1	18.3	40.8	9.15	21.7	20	30.8
8	10.85	34.2	20	33.3	5.8	18.35	16.7	31.7
9	8.3	38.75	13.3	36.7	8.75	22.05	12.5	22.5
10	8.35	35.45	16.7	32.5	7.5	15.4	15.8	23.3
11	6.65	32.5	14.2	30	9.15	11.25	15.8	21.7
12	6.25	30.4	15.8	29.2	10.4	16.65	12.5	22.5
13	9.2	23.3	15	27.5	10	14.2	10.8	18.3
14	9.6	25.4	13.3	31.7	9.15	15	13.3	20
15	6.65	23.75	15	25	8.75	11.25	12.5	26.7
16	7.9	25	13.3	25.8	7.1	15	11.7	20
17	8.75	21.65	12.5	21.7	5.4	15	16.7	20.8
18	8.75	21.25	14.2	25.8	10.45	14.15	15.8	20
19	8.3	22.9	14.2	22.5	10.8	10.4	11.7	19.2
20	10.45	19.6	17.5	24.2	12.1	13.3	13.3	20
21	5.8	18.35	14.2	25	8.75	11.25	14.2	15.8
22	10	17.5	15.8	27.5	7.9	13.35	10	15
23	9.2	17.5	16.7	15.8	10.85	10	13.3	18.3
24	7.1	19.15	10.8	19.2	12.1	17.1	16.7	23.3
25	8.75	25.85	12.5	21.7	12.9	20	20	25
26	7.1	16.25	11.7	17.5	13.3	20.4	12.5	20.8
27	8.75	17.1	7.5	14.2	12.5	15.4	14.2	15
28	5.8	12.95	10.8	16.7	12.5	14.55	11.7	16.7
29	6.25	13.75	9.2	13.3	7.5	12.1	11.7	19.2
30	8.75	13.75	14.2	15.8	9.2	10.4	11.7	10.8
31	8.3	16.25	12.5	9.2	10	10	10	10
32	7.1	12.1	6.7	7.5	8.3	8.75	7.5	15
33	7.1	11.7	5.8	11.7	7.1	12.9	11.7	12.5
34	5.4	14.15	7.5	13.3	12.5	22.5	12.5	19.2
35	9.9	9.9	19.1	19.1	15.6	15.6	15.3	15.3
36	17.05	32.1	20.8	35	26.25	37.5	23.3	25

## Sheet: Figure 2C-2H
		Freezing%						Discrimination index (DI)
		Test 1		Test 2		Test 3		Test 2 vs Test 1	Test 3 vs Test 2	Test 3 vs Test 1
Genotype	Age	preCS	CS	preCS	CS	preCS	CS
AppNL-G-F	6	12.5	57.5	5.8	0	1.7	21.7	0	1	0.27399
AppNL-G-F	6	19.2	48.3	0	7.5	19.2	23.3	0.134409	0.756494	0.325419
AppNL-G-F	6	66.7	66.7	4.2	17.5	6.7	9.2	0.207838	0.344569	0.121212
AppNL-G-F	6	27.5	45.8	3.3	21.7	15	37.5	0.321481	0.633446	0.45018
AppNL-G-F	6	16.7	27.5	14.2	10	19.2	29.2	0.266667	0.744898	0.514991
AppNL-G-F	6	24.2	61.7	7.5	13.3	26.7	40.8	0.177333	0.754159	0.398049
AppNL-G-F	6	20	38.3	7.5	11.7	28.3	30	0.234	0.719424	0.439239
AppNL-G-F	6	46.7	47.5	21.7	45	33.3	55.8	0.486486	0.553571	0.540174
AppNL-G-F	6	17.5	45.8	1.7	1.7	17.5	41.7	0.0357895	0.960829	0.476571
AppNL-G-F	6	25.8	60.8	1.7	6.7	15.8	50.8	0.0992593	0.883478	0.455197
AppNL-G-F	6	24.2	57.5	1.7	29.2	20	38.3	0.336794	0.567407	0.399791
AppNL-G-F	6	1.7	21.7	5	5	9.2	21.7	0.187266	0.812734	0.5
AppNL-G-F	6	40.8	36.7	0	9.2	20.8	30.8	0.200436	0.77	0.456296
Control	6	14.2	26.7	0	7.5	11.7	10.8	0.219298	0.590164	0.288
Control	6	17.5	17.5	10	34.2	14.2	20.8	0.661509	0.378182	0.543081
Control	6	23.3	14.2	3.3	20.8	25.8	41.7	0.594286	0.6672	0.745975
Control	6	15.8	42.5	2.5	1.7	18.3	21.7	0.0384615	0.92735	0.338006
AppNL-G-F	6	15	50	19.2	34.2	34.2	24.2	0.406176	0.414384	0.326146
AppNL-G-F	6	30.8	54.2	14.2	31.7	25.8	25	0.369034	0.440917	0.315657
AppNL-G-F	6	14.2	30.8	9.2	26.7	20	35	0.464348	0.567261	0.531915
AppNL-G-F	6	35.8	29.2	5	15	15	22.5	0.339367	0.6	0.435203
Control	6	13.3	33.3	0	13.3	15	29.2	0.285408	0.687059	0.4672
Control	6	8.3	55.8	10.8	34.2	35.8	42.5	0.38	0.554107	0.43235
Control	6	5	22.5	5	12.5	15	25	0.357143	0.666667	0.526316
Control	6	13.3	25	3.3	13.3	18.3	29.2	0.347258	0.687059	0.538745
Control	6	5.8	15	1.7	3.3	10.8	9.2	0.180328	0.736	0.380165
Control	6	3.3	20.8	8.3	18.3	23.3	32.5	0.468031	0.639764	0.609756
Control	6	0	24.2	9.2	18.3	7.5	22.5	0.430588	0.551471	0.481799
Control	6	1.7	19.2	1.7	3.3	6.7	19.2	0.146667	0.853333	0.5
AppNL-G-F	6	49.2	63.3	10	26.7	17.5	50	0.296667	0.65189	0.441306
AppNL-G-F	6	34.2	24.2	22.5	16.7	38.3	31.7	0.408313	0.654959	0.567084
AppNL-G-F	6	46.7	45	17.5	18.3	42.5	59.2	0.2891	0.763871	0.568138
AppNL-G-F	6	35	67.5	15	6.7	30	45.8	0.0902965	0.872381	0.404237
Control	6	20.8	44.2	5	25	25	51.7	0.361272	0.674055	0.539103
Control	6	8.3	31.7	5.8	6.7	19.2	39.2	0.174479	0.854031	0.552891
Control	6	20.8	57.5	5	10	5.8	55	0.148148	0.846154	0.488889
Control	6	31.7	40	2.5	8.3	7.5	38.3	0.171843	0.821888	0.489144
Control	6	29.2	16.7	1.7	18.3	15.8	30	0.522857	0.621118	0.642398
Control	6	35	53.3	9.2	30.8	22.5	38.3	0.366231	0.554269	0.418122
Control	6	35.8	62.5	6.7	9.2	30.8	50	0.128312	0.844595	0.444444
Control	6	47.5	45.8	15	17.5	12.5	31.7	0.276461	0.644309	0.409032
Control	6	64.2	65	15.8	17.5	42.5	40	0.212121	0.695652	0.380952
Control	6	38.3	70	10.8	15	40.8	68.3	0.176471	0.819928	0.493854
Control	6	50	55.8	5.8	9.2	9.2	25	0.141538	0.730994	0.309406
Control	6	45	63.3	10	22.5	36.7	51.7	0.262238	0.696765	0.449565
AppNL-G-F	6	40	43.3	4.2	4.2	45	31.7	0.0884211	0.883008	0.422667
AppNL-G-F	6	38.3	49.2	18.3	33.3	52.5	62.5	0.403636	0.652401	0.559534
AppNL-G-F	6	38.3	62.5	20.8	12.5	40	63.3	0.166667	0.835092	0.50318
AppNL-G-F	6	24.2	57.5	5.8	3.3	36.7	37.5	0.0542763	0.919118	0.394737
Control	12	48.3	18.3	14.2	23.3	31.7	45	0.560096	0.658858	0.7109
Control	12	17.5	28.3	10.8	21.7	25.8	38.3	0.434	0.638333	0.575075
Control	12	6.7	14.2	0	4.2	15.8	36.7	0.228261	0.897311	0.721022
Control	12	9.2	18.3	5.8	4.2	14.2	20.8	0.186667	0.832	0.531969
Control	12	5	54.2	10	6.7	39.2	43.3	0.110016	0.866	0.444103
Control	12	14.2	17.5	20	20	28.3	42.5	0.533333	0.68	0.708333
Control	12	8.3	66.7	4.2	25.8	30	33.3	0.278919	0.563452	0.333
Control	12	16.7	29.2	26.7	15	27.5	43.3	0.339367	0.74271	0.597241
Control	12	67.5	80	5.8	26.7	21.7	63.3	0.250234	0.703333	0.441731
AppNL-G-F	12	71.7	68.3	14.2	42.5	21.7	34.2	0.383574	0.445893	0.333659
AppNL-G-F	12	69.2	56.7	8.3	15.8	4.2	17.5	0.217931	0.525526	0.235849
AppNL-G-F	12	3.3	74.2	11.7	19.2	3.3	19.2	0.205567	0.5	0.205567
AppNL-G-F	12	46.7	81.7	14.2	30.8	51.7	64.2	0.273778	0.675789	0.440027
AppNL-G-F	12	23.3	30.8	5.8	3.3	23.3	39.2	0.0967742	0.922353	0.56
AppNL-G-F	12	22.5	45.8	21.7	17.5	24.2	25	0.276461	0.588235	0.353107
AppNL-G-F	12	40.8	59.2	10.8	17.5	19.2	32.5	0.228162	0.65	0.354417
AppNL-G-F	12	20	37.5	22.5	27.5	33.3	50.8	0.423077	0.648787	0.575311
AppNL-G-F	12	39.2	46.7	12.5	8.3	14.2	23.3	0.150909	0.737342	0.332857
AppNL-G-F	12	52.5	57.5	1.7	10	17.5	20.8	0.148148	0.675325	0.265645
AppNL-G-F	12	17.5	31.7	1.7	15	13.3	18.3	0.321199	0.54955	0.366
AppNL-G-F	12	19.2	40.8	2.5	5	17.5	15	0.10917	0.75	0.268817
AppNL-G-F	12	34.2	40	0	9.2	15.8	19.2	0.186992	0.676056	0.324324
AppNL-G-F	12	25	23.3	5	8.3	19.2	19.2	0.262658	0.698182	0.451765
AppNL-G-F	12	25.8	45	20	30	25	22.5	0.4	0.428571	0.333333
Control	12	23.3	40	29.2	30	14.2	19.2	0.428571	0.390244	0.324324
Control	12	25.8	33.3	17.5	18.3	32.5	13.3	0.354651	0.420886	0.285408
Control	12	15	23.3	17.5	17.5	29.2	31.7	0.428922	0.644309	0.576364
Control	12	15	38.3	22.5	37.5	29.2	30.8	0.494723	0.450952	0.445731
Control	12	24.2	36.7	8.3	26.7	30	46.7	0.421136	0.63624	0.559952
Control	12	36.7	30	15.8	10	16.7	43.3	0.25	0.812383	0.590723
Control	12	30	55	5.8	7.5	22.5	38.3	0.12	0.836245	0.410504
Control	12	36.7	60	16.7	36.7	15	41.7	0.379524	0.531888	0.410029
AppNL-G-F	12	61.7	69.2	17.5	23.3	45.8	39.2	0.251892	0.6272	0.361624
AppNL-G-F	12	35.8	36.7	10.8	24.2	49.2	18.3	0.397373	0.430588	0.332727
AppNL-G-F	12	69.2	74.2	28.3	47.5	26.7	30	0.390304	0.387097	0.287908
AppNL-G-F	12	44.2	30	18.3	33.3	30.8	45	0.526066	0.574713	0.6
Control	12	38.3	36.7	10	9.2	26.7	21.7	0.200436	0.702265	0.371575
AppNL-G-F	12	62.5	46.7	10	8.3	16.7	14.2	0.150909	0.631111	0.233169
Control	12	60	75.8	9.2	23.3	39.2	35.8	0.235116	0.605753	0.320789
Control	12	17.5	37.5	4.2	25	22.5	29.2	0.4	0.538745	0.437781
Control	12	20.8	41.7	15.8	22.5	14.2	45	0.350467	0.666667	0.519031
Control	12	3.3	15.8	16.7	23.3	20.8	32.5	0.595908	0.582437	0.672878
Control	12	3.3	13.3	4.2	22.5	2.5	31.7	0.628492	0.584871	0.704444
Control	12	16.7	51.7	25.8	25.8	34.2	49.2	0.332903	0.656	0.487611
AppNL-G-F	12	46.7	39.2	16.7	25.8	23.3	25	0.396923	0.492126	0.389408
AppNL-G-F	12	37.5	42.5	23.3	27.5	28.3	44.2	0.392857	0.616457	0.509804
AppNL-G-F	12	46.7	68.3	8.3	30	50.8	45.8	0.305188	0.604222	0.401402
AppNL-G-F	12	48.3	38.3	17.5	15.8	13.3	22.5	0.292052	0.587467	0.370066
AppNL-G-F	12	54.2	72.5	29.2	25	35	45	0.25641	0.642857	0.382979

## Sheet: Figure 2—figure supplement 1CD
Aβ plaque area (%)
6 m.o. AppNL-G-F		12 m.o. AppNL-G-F
anterior	posterior	anterior	posterior
1.89239	2.1751	1.95625	2.78124
1.58656	1.97913	2.37021	2.70702
1.6816	2.19964	2.43686	3.43422
2.47801	2.55822	2.32671	3.18992
2.15244	2.18237	2.53509	3.76135
		3.02623	2.94374
		4.38517	5.81187
		3.16183	4.98811
		2.18816	4.17898
		3.5978	4.05616
		3.62052	3.67815
