# Supplementary material for: Misclassification in memory modification in AppNL-G-F knock-in mouse model of Alzheimer’s disease
Source: eLife. 2025 Nov 4;14:RP105347. doi: 10.7554/eLife.105347 (PMC12585179; doi:10.7554/eLife.105347)
Supplement: Figure 3—figure supplement 1—source data 1. [file elife-105347-fig3-figsupp1-data1.xlsx]

## Sheet: Figure 3—figure supplement 1A-C
		Discrimination index (DI) calculated from simulated CR
Genotype	Age	Test 2 vs Test 1	Test 3 vs Test 2	Test 3 vs Test 1
AppNL-G-F	6	0.258243	0.511508	0.26716
AppNL-G-F	6	0.290944	0.700431	0.489638
AppNL-G-F	6	0.445176	0.561671	0.506941
AppNL-G-F	6	0.113051	0.886949	0.5
AppNL-G-F	6	0.306087	0.567043	0.366171
AppNL-G-F	6	0.226991	0.755929	0.476295
AppNL-G-F	6	0.271698	0.696976	0.461804
Control	6	0.533117	0.620444	0.65115
Control	6	0.277868	0.498977	0.277048
AppNL-G-F	6	0.349769	0.51494	0.363483
AppNL-G-F	6	0.48579	0.507792	0.493579
Control	6	0.438821	0.528592	0.467183
Control	6	0.428562	0.549916	0.478167
Control	6	0.394866	0.641098	0.538232
AppNL-G-F	6	0.378465	0.738078	0.631798
AppNL-G-F	6	0.253632	0.516913	0.266655
Control	6	0.411033	0.626643	0.539454
Control	6	0.286499	0.732766	0.524044
Control	6	0.209212	0.790615	0.499739
Control	6	0.499035	0.500012	0.499047
Control	6	0.498983	0.500025	0.499008
Control	6	0.238992	0.73543	0.466086
Control	6	0.377006	0.504122	0.380887
Control	6	0.321077	0.491588	0.313786
Control	6	0.286897	0.712857	0.499699
Control	6	0.289669	0.623405	0.403003
AppNL-G-F	6	0.201332	0.768528	0.455624
Control	12	0.498655	0.506889	0.505545
Control	12	0.533022	0.57279	0.604804
Control	12	0.287782	0.905466	0.794669
Control	12	0.276447	0.53897	0.308753
Control	12	0.313237	0.498425	0.311883
Control	12	0.476355	0.509378	0.48572
Control	12	0.352234	0.521971	0.37255
AppNL-G-F	12	0.333249	0.514569	0.346325
AppNL-G-F	12	0.37081	0.53737	0.406372
AppNL-G-F	12	0.276628	0.498918	0.275763
AppNL-G-F	12	0.407757	0.57491	0.482174
AppNL-G-F	12	0.0976602	0.801632	0.304285
AppNL-G-F	12	0.284011	0.499598	0.283684
AppNL-G-F	12	0.209566	0.51904	0.222467
AppNL-G-F	12	0.280268	0.495569	0.276706
AppNL-G-F	12	0.21624	0.627458	0.317261
AppNL-G-F	12	0.299171	0.524225	0.31989
Control	12	0.326282	0.516151	0.340644
Control	12	0.346031	0.5293	0.373041
Control	12	0.331522	0.533003	0.361444
Control	12	0.381168	0.653622	0.53753
Control	12	0.362102	0.568905	0.428281
Control	12	0.19937	0.596687	0.269225
Control	12	0.272722	0.606025	0.365814
AppNL-G-F	12	0.33581	0.526975	0.36031
AppNL-G-F	12	0.365758	0.528691	0.392798
AppNL-G-F	12	0.419392	0.651569	0.574607
Control	12	0.443459	0.482942	0.426684
Control	12	0.39258	0.621444	0.514796
Control	12	0.363179	0.620445	0.482469
Control	12	0.437064	0.574035	0.51131
Control	12	0.508071	0.573955	0.581831
Control	12	0.391754	0.523842	0.414715
AppNL-G-F	12	0.353379	0.534006	0.385093
AppNL-G-F	12	0.417736	0.613648	0.532603
AppNL-G-F	12	0.323664	0.545977	0.365271
AppNL-G-F	12	0.334337	0.498255	0.332785
AppNL-G-F	12	0.36183	0.533782	0.393627

## Sheet: Figure 3—figure supplement 1D
		Observed CR - Simulated CR in each trial
Genotype	Age	1	2	3	4	5	6	7	8	9	10	11	12	13	14	15	16	17	18	19	20	21	22	23	24	25	26	27	28	29	30	31	32	33	34	35	36
AppNL-G-F	6	-0.318667	-0.526265	-0.203104	0.124926	0.122748	0.257615	-0.0228385	0.127878	-0.0837381	0.0660271	0.130293	-0.0109046	-0.0931979	0.0416893	-0.112318	-0.210862	-0.0608888	0.21761	-0.0101412	0.0506492	0.257379	0.317882	-0.113922	-0.299538	-0.214853	-0.20963	-0.175235	-0.257543	-0.0652315	-0.00351823	0.000641512	-0.240576	-0.165429	-0.304658	0.0533918	0.0583789
AppNL-G-F	6	-0.481658	0	-0.300481	0	-0.28268	-0.393236	-0.195809	-0.0390035	-0.348731	-0.342587	-0.417933	-0.215708	0.286213	-0.392655	-0.151182	0.371311	-0.25059	-0.209149	0.231241	0.0129085	-0.287208	0.112153	0.0932098	-0.212015	-0.0232659	-0.194387	-0.223549	-0.0368028	0.0874151	0.34971	0.291473	-0.0870087	-0.326426	0.0103473	-0.0362565	-0.158913
AppNL-G-F	6	-0.319361	-0.87795	-0.863588	0.0114989	0.414973	-0.311627	0.343281	0.131299	-0.109366	-0.0134929	-0.146492	-0.0236446	0.0179988	0.0465504	-0.020621	0.0887886	-0.234608	-0.180426	-0.192744	0.320017	-0.408751	-0.0840668	-0.218084	0.00484757	0.0841913	-0.104169	-0.149578	-0.0256903	-0.348923	-0.107317	-0.436569	-0.333085	-0.273078	0.102274	-0.119721	0.127317
AppNL-G-F	6	-0.188068	-0.794408	-0.699013	0	0.104376	0.345277	0.342007	0.397918	0.280122	0.157921	0.418334	0.377598	0.310461	0.022871	0.282937	-0.059002	0.146732	-0.00446044	-0.0175106	-0.0322181	-0.0732519	0.0501793	-0.0583049	0.104555	0.0909552	0.0781455	0.0914897	-0.044901	0.0505832	-0.0315842	-0.00356737	-0.126876	-0.126836	-0.0172633	-0.003712	-0.164473
AppNL-G-F	6	-0.227207	-0.766207	-0.684211	-0.0542763	-0.0674339	0.00600416	0.00138912	-0.322458	-0.0725029	-0.0529632	-0.0841419	-0.205498	0.0368347	0.356273	-0.014316	0.0376484	-0.120484	-0.114907	-0.0159811	-0.178677	0.204811	0.0524456	-0.280342	-0.0328208	-0.108621	-0.261527	-0.277916	-0.286485	-0.355006	-0.276467	-0.362587	-0.341504	-0.293499	0.03916	0.00273104	0.0522223
AppNL-G-F	6	0.100337	-0.400685	-0.80137	-0.256849	0.134815	0.191109	0.103258	0.103636	0.143054	0.321146	0.0141366	-0.126283	-0.123628	-0.179706	0.0241236	-0.289442	-0.229929	-0.287019	-0.173008	-0.17212	-0.171321	-0.0541606	-0.224736	0.00220712	-0.00359687	-0.0265904	-0.281369	-0.167074	-0.166168	-0.165476	-0.0793037	-0.219251	-0.218856	-0.122413	-0.0577658	-0.166322
AppNL-G-F	6	0.0532102	-0.877451	-0.490196	-0.10049	-0.406863	-0.142157	0	-0.223039	-0.322139	-0.132582	-0.184821	-0.155517	-0.153928	0.050925	-0.0680931	0.0479517	-0.127904	-0.0221452	-0.344329	-0.177162	-0.093845	-0.0500839	0.0326508	0.138086	0.0824751	-0.309733	-0.282192	-0.296566	-0.253525	-0.10594	-0.24813	-0.326989	-0.263982	-0.147567	0.0465884	-0.103158
Control	6	-0.284936	-0.999475	-0.698141	-0.0883422	-0.0106809	-0.24977	-0.330668	-0.368739	-0.229447	-0.188518	0.089798	-0.288976	-0.128194	-0.32953	-0.408573	-0.408485	-0.367635	-0.367558	-0.0293557	-0.0892392	-0.228263	-0.187434	-0.247328	-0.166831	-0.0478865	-0.41108	-0.233479	-0.217117	-0.279636	-0.200277	0.337493	-0.105224	-0.324642	0.00908941	-0.113733	0.19949
Control	6	-0.238338	-0.284497	-0.518229	0.266282	0.0654648	-0.246455	-0.184965	-0.242775	-0.204565	-0.281836	-0.20391	-0.144866	-0.0646826	0.0319443	-0.123213	-0.123092	-0.00533631	-0.162885	0.0536765	-0.0262402	0.0538369	-0.280209	-0.122495	-0.285339	-0.104189	-0.143487	0.249718	-0.161903	-0.12181	-0.180566	-0.102866	-0.00399929	-0.279257	-0.242327	-0.127793	0.229415
AppNL-G-F	6	-0.565705	-0.472832	-0.153927	-0.111571	0.0350653	0.028755	-0.0175311	-0.110238	0.0295518	0.279562	0.0338493	0.0832329	-0.164189	0.166548	-0.350845	0.0502006	0.139614	-0.0250391	0.00635234	0.179664	-0.126068	0.102706	-0.0341698	0.1753	0.00593334	-0.153557	-0.261455	0.1386	-0.238649	-0.277883	0.246061	0.0659059	-0.200711	-0.0302454	-0.14986	-0.176744
AppNL-G-F	6	-0.597633	-0.578766	-0.161986	-0.246579	-0.00901588	-0.346249	0.373315	0.064686	-0.0957922	0.256956	0.212878	0.0365239	-0.302089	-0.067511	0.094756	0.050673	-0.0957034	0.0207063	0.227063	0.0365929	0.124783	0.403448	0.126348	-0.190273	0.0134301	-0.437625	0.123582	-0.401698	-0.221577	0.0184427	-0.0378993	-0.136635	-0.309509	-0.285765	-0.267887	-0.157307
Control	6	-0.598125	-0.735064	-0.513646	-0.120488	0.0757746	0.199059	0.295879	0.246783	0.102315	0.404375	0.235333	0.12698	-0.0897561	0.307667	-0.363013	0.220014	0.408081	0.380301	0.341253	0.0132042	-0.158898	-0.295068	-0.214711	-0.0474224	0.179879	0.175665	-0.214819	-0.437988	-0.274158	-0.328803	-0.334572	-0.342029	-0.167641	-0.278313	-0.249601	-0.105618
Control	6	-0.569188	-0.960234	-0.698159	0.0936357	-0.224524	0.164104	0.084037	-0.0807724	-0.176299	-0.0626879	-0.190697	0.083504	-0.241603	-0.117454	-0.038553	0.0381958	-0.166715	-0.0152449	-0.116676	-0.0408727	-0.0530435	0.197822	-0.42238	-0.0508802	-0.155476	0.120844	0.0990447	0.101749	-0.138965	-0.335234	-0.0420411	-0.377327	0.198558	-0.0668445	-0.0969574	-0.0688713
Control	6	-0.671932	-0.948051	-0.623374	-0.078168	-0.273599	0.153645	0.260429	0.124236	-0.307347	-0.251922	-0.280931	0.308017	-0.31469	-0.223157	-0.269027	0.141618	0.0568178	-0.11072	0.204629	-0.0548521	-0.0703255	-0.412665	-0.0814179	-0.163502	-0.178444	-0.200906	-0.0362861	-0.0605668	-0.19563	0.0229167	-0.0866755	0.400969	0.131991	0.0833037	0.0310849	0.18607
AppNL-G-F	6	-0.480971	-0.787058	-0.446158	0.254977	0.0618394	-0.104513	-0.0785967	0.228302	0.100458	-0.0305567	-0.263377	-0.175358	-0.048077	-0.0786675	0.113371	-0.145585	-0.125507	-0.00689354	-0.284478	-0.0273528	0.0467093	0.189507	0.00923904	-0.137882	0.100923	-0.180183	-0.0241473	0.0185674	0.172676	0.0750263	-0.191596	-0.2336	-0.0509771	0.00152033	0.0770782	0.133201
AppNL-G-F	6	-0.252981	-0.508744	-0.389072	-0.0780512	0.0506123	0.143241	-0.0414944	0.128408	0.199919	0.126308	0.218466	0.16916	0.114362	0.046623	0.304866	-0.00811996	0.143513	0.191175	0.0218769	0.115898	0.210369	0.2823	0.0912769	0.152702	0.272216	-0.0773637	-0.200711	-0.176516	-0.177779	-0.110195	-0.328351	-0.114564	-0.195921	-0.263362	0.170842	0.246846
Control	6	-0.676961	-0.936776	-0.869382	0.138545	-0.287854	0.340686	0.25611	-0.183334	0.344026	-0.41849	0.00939826	-0.0730326	-0.141772	-0.0842608	0.114901	0.187287	-0.0765	-0.198251	-0.175961	0.034269	-0.119866	0.0264663	0.155229	-0.365645	0.198016	-0.196486	0.0257772	-0.0683501	-0.162628	-0.257029	-0.382011	-0.286133	-0.397952	-0.0146763	-0.319956	0.16089
Control	6	-0.669867	-0.893957	-0.368201	-0.0748447	-0.234612	-0.444378	0.313472	-0.242366	0.0727912	-0.204885	0.126624	-0.187204	-0.162829	-0.105218	-0.201395	0.174663	-0.0278287	0.0407691	-0.111358	-0.130491	-0.0653455	0.0170721	-0.00512425	-0.0864619	0.204493	0.0252413	-0.069475	0.00598058	-0.158879	-0.0335163	-0.266268	-0.0583225	-0.0702196	-0.15259	-0.0908344	0.00493345
Control	6	-0.0315163	-0.662162	-0.521959	-0.0287162	-0.226343	0.0132763	-0.278969	-0.0196541	0.0457375	0.383007	-0.387623	0.0906382	0.373313	0.166714	0.130685	0.231757	0.33721	0.13363	-0.295396	-0.104621	0.163572	0.11847	0.312006	0.0475879	-0.0374142	-0.122013	-0.17796	-0.234013	-0.178648	-0.26351	-0.263909	-0.264287	-0.151461	-0.0956429	-0.104293	-0.0699029
Control	6	-0.553154	-0.522736	-0.286047	-0.264916	0.402759	0.447301	0.330789	0.38994	0.273437	0.186498	0.156949	-0.161298	0.28741	-0.0604038	-0.0743059	-0.190817	0.0422355	-0.204712	-0.0168778	-0.248174	-0.161211	-0.24816	-0.0603274	-0.205464	-0.175018	-0.321128	-0.131564	-0.00112524	-0.131556	-0.0880731	0.0267135	-0.321109	-0.408062	-0.234952	-0.222858	-0.0314991
Control	6	-0.618293	-0.427972	0.112826	-0.0250143	-0.109771	0.046544	0.0269496	-0.108121	0.093986	0.0362741	-0.0791776	-0.117264	0.0755936	-0.155337	0.0756241	0.180718	-0.203796	0.10453	0.0179357	0.382842	0.180773	-0.165638	-0.270711	-0.387483	-0.0304619	-0.059335	-0.184038	-0.155161	-0.290256	0.0758025	-0.396477	-0.376841	-0.2706	-0.282309	-0.2485	-0.195766
Control	6	-0.524622	-0.868074	-0.472296	-0.175462	0.0295348	0.00723808	-0.0195006	0.406079	0.30648	0.38313	0.147351	-0.0230325	0.0903963	0.225484	0.338918	0.219757	0.0897336	-0.0299794	0.082302	0.160123	-0.0695778	0.205887	0.119778	0.151277	0.254964	0.316898	-0.0652689	0.0791004	-0.183418	-0.0174923	-0.126173	0.0169873	-0.135466	-0.192674	-0.128787	-0.213332
Control	6	-0.578786	-0.698053	-0.680768	-0.118876	0.142546	0.0183192	0.0202738	0.375891	0.102797	0.104325	0.428843	0.285255	-0.326438	0.0792581	0.370817	0.145916	0.292372	-0.156935	-0.17299	-0.444381	-0.00785882	0.00891735	-0.231577	0.35534	-0.117249	-0.325363	0.0478757	-0.159423	0.0354791	-0.286128	-0.220932	0.426437	-0.249238	-0.294742	-0.277214	-0.0295477
Control	6	-0.456209	-0.539708	-0.648298	0	-0.137029	0.216958	0.176978	0.230226	0.252252	0.310683	0.286688	0.0608628	0.184548	0.0647212	0.0386052	0.161377	-0.0401715	-0.173784	0.00205583	-0.024787	-0.0646705	0.436712	-0.104098	0.426384	0.0114548	-0.0120708	0.00246758	-0.198973	-0.157552	0.086296	-0.156198	-0.317741	-0.114685	-0.242775	0.00311421	0.137543
Control	6	-0.182035	-0.72	-0.5728	0	-0.0128	-0.0128	-0.0427065	0.227237	0.0870525	0.00543414	0.127029	-0.0331454	0.0011309	-0.0340102	-0.284659	-0.14719	-0.264604	-0.116787	-0.140461	-0.178772	-0.364479	-0.203148	-0.361956	0.0717221	0.430582	0.395444	0.171196	0.280467	-0.13076	-0.276706	-0.168472	-0.394799	-0.301247	-0.282322	-0.13892	-0.0259982
Control	6	-0.510321	-0.86	-0.401667	0	-0.0231489	0.145086	-0.136049	0.223891	0.177699	-0.0590454	0.103107	0.0395594	-0.0521196	-0.103117	-0.0581484	0.0829682	-0.0113121	0.170762	-0.0357466	-0.0757935	-0.24101	0.0386302	-0.210184	-0.117899	0.140347	-0.0320406	-0.166662	-0.0959939	0.0306705	-0.189719	-0.230356	0.158836	0.0212358	-0.0877934	-0.057126	0.131617
AppNL-G-F	6	-0.11395	-1	-0.666087	0	-0.263842	0.242534	0.153226	-0.117273	-0.15598	0.0842513	0.0461222	-0.023176	0.0388129	0.0254513	0.143867	-0.0719227	0.103369	-0.142385	-0.184801	-0.053419	-0.0960462	-0.196146	-0.238922	0.0732883	-0.157934	0.0940651	-0.00619125	-0.105611	-0.148067	0.0127119	0.0133372	-0.116578	0.0282143	-0.194693	0.0979505	-0.184792

## Sheet: Figure 3—figure supplement 1E
		Observed CR - Simulated CR in each trial
Genotype	Age	1	2	3	4	5	6	7	8	9	10	11	12	13	14	15	16	17	18	19	20	21	22	23	24	25	26	27	28	29	30	31	32	33	34	35	36
Control	12	-0.557744	-0.678772	-0.350154	-0.280029	0.0759461	-0.345416	-0.218513	-0.247253	0.443128	0.02014	-0.176116	0.00664519	0.204633	0.0777459	0.231738	0.260517	0.0625604	0.120102	0.120114	0.2318	0.133672	0.274121	-0.10658	-0.177198	-0.175801	-0.162312	-0.275684	-0.360283	-0.120006	0.0204393	-0.0489293	-0.104747	-0.341239	-0.192417	0.00700452	0.159168
Control	12	-0.437494	-0.999986	-0.636561	0.220383	-0.192732	-0.0983694	-0.278307	-0.392788	-0.392571	-0.438833	-0.370364	-0.165299	-0.140574	-0.16504	-0.369843	-0.438042	-0.164718	-0.344952	-0.0962291	0.0650566	-0.369291	-0.186156	-0.232533	-0.14142	0.178133	0.20274	0.0197259	0.202829	0.0662558	0.429678	-0.0948811	0.293125	0.0682315	-0.0315624	-0.0309936	0.225023
Control	12	-0.131605	-1	-0.86376	0.183959	0.0664343	-0.0262584	-0.116606	-0.0728592	-0.11624	-0.0479114	-0.00412381	-0.0226533	-0.113707	-0.0685343	-0.0738103	0.0949985	0.080136	0.106436	0.0194784	0.043251	0.0445856	0.0237024	-0.0437805	-0.00346605	0.00387786	0.0260796	-0.0418606	0.00457065	-0.0416752	-0.0416193	0.00474569	-0.0415406	0.00481047	0.0324319	0.216305	0.2145
Control	12	0.180513	-0.358161	6.33672e-09	-0.216763	-0.26791	-0.422019	-0.300003	-0.397163	-0.303193	-0.366083	-0.296711	-0.360911	-0.269619	-0.323371	-0.328486	-0.334062	-0.25625	-0.251087	-0.246291	-0.241833	-0.262255	-0.282966	-0.327066	-0.176976	-0.366529	-0.244076	-0.271362	-0.168972	-0.186058	-0.302066	-0.261059	-0.232021	0.000423124	-0.285247	-0.0867725	0.179063
Control	12	-0.126294	-0.227545	0.180256	0.240925	-0.168534	-0.229563	-0.118393	-0.295749	-0.295925	-0.252165	-0.252438	-0.240728	-0.186361	-0.197333	-0.153642	-0.241951	-0.0649261	-0.221234	-0.10954	0.078157	-0.17681	0.110892	-0.20007	0.202405	0.015155	-0.0184074	0.293297	0.23698	-0.119347	-0.0410097	-0.186673	-0.0536685	0.0126716	0.0482575	-0.116232	0.150114
Control	12	-0.497316	-0.738898	-0.722574	-0.104217	-0.244502	-0.200283	-0.425117	-0.369401	-0.200481	-0.26973	0.335009	-0.242684	-0.269701	-0.340637	-0.12948	-0.171701	-0.340612	-0.129456	0.407335	-0.224015	-0.0940821	-0.119101	-0.424338	-0.349079	-0.146781	-0.15619	-0.109971	-0.374646	-0.21541	-0.07145	0.0166944	-0.204354	-0.129864	-0.290125	-0.0952135	0.167137
Control	12	-0.425112	-0.982234	-0.616093	0	-0.406739	-0.354549	-0.148601	0.245422	-0.12361	0.148467	0.02025	-0.211074	-0.222697	-0.0496993	-0.306514	-0.0483195	-0.327727	0.0836132	-0.12028	-0.182084	-0.23367	-0.25257	0.0805127	0.101933	0.0598426	-0.17336	-0.142672	0.116864	-0.29676	-0.204758	0.216428	-0.122722	-0.0756566	-0.246933	-0.0501338	0.18593
AppNL-G-F	12	-0.440973	-0.938225	-0.138999	-0.054879	0.00355397	-0.137149	0.128699	0.443886	-0.292196	-0.0889748	0.197137	-0.0880252	0.097629	-0.215661	-0.0444167	0.306458	0.130362	0.0923413	0.164098	0.208991	-0.0379572	-0.118397	-0.378982	-0.025053	0.321264	0.0532046	-0.0796115	-0.0757007	-0.19757	-0.111565	-0.0808666	0.0462756	-0.438421	0.0144161	-0.278203	-0.153865
AppNL-G-F	12	0.0147293	-1	-0.303318	-0.170616	0	-0.0898047	0.0358088	0.0145936	-0.23386	0.0774525	0.316778	0.32848	-0.162372	0.122907	0.170391	0.0718555	0.223912	-0.191703	0.0651866	-0.0480289	0.0753263	0.0924774	0.123522	0.215949	0.272135	-0.0955129	-0.0117907	-0.199117	0.269107	-0.265998	0.0414237	-0.245869	-0.228772	-0.40609	0.0643554	-0.474445
AppNL-G-F	12	-0.335133	-0.409348	-0.0537955	0.0691341	-0.0348385	0.420005	-0.278916	0.357923	0.0282337	0.0175714	-0.164621	0.226688	-0.162878	-0.116712	-0.299606	-0.0467076	-0.126279	-0.0914121	-0.194513	-0.12523	-0.251836	-0.308119	-0.342352	-0.195031	-0.0715906	0.126846	-0.0205955	0.163677	-0.271656	-0.283692	-0.259955	-0.132826	-0.294012	-0.114598	-0.150609	-0.11306
AppNL-G-F	12	-0.627309	-0.612903	-0.258065	-0.0206452	6.66134e-16	-0.139308	-0.208393	-0.334903	-0.35211	-0.226476	-0.394099	-0.265505	-0.302556	-0.387257	-0.302192	-0.0906647	-0.643829	-0.264547	-0.542212	-0.412083	-0.219787	-0.446468	-0.276525	-0.382772	0.0115492	-0.0469754	-0.217486	-0.245199	-0.071602	-0.34044	-0.0315909	-0.272339	-0.22239	-0.365915	-0.117926	-0.177601
AppNL-G-F	12	-0.24367	-0.84527	-0.44533	-0.0913379	-0.2	0.263874	0.343974	-0.0275427	-0.115361	0.304388	-0.0647952	0.248599	0.308566	0.367381	0.599415	0.274705	0.527078	0.399555	0.383064	0.163136	0.523921	0.260202	0.172069	0.0795695	0.535122	0.325513	0.331249	0.110863	0.313432	0.31539	0.295618	0.030235	0.209981	-0.0512053	0.216785	0.620651
AppNL-G-F	12	-0.329435	-0.0111449	-0.316382	0.165148	-0.0985485	0.0248629	-0.0486969	-0.125304	-0.0116478	-0.0296004	0.140609	0.00920285	0.310885	0.0842083	-0.0472398	0.329241	-0.0108383	-0.160446	-0.0855691	-0.0106955	0.216102	-0.0287581	-0.0468637	0.0437709	0.0663874	-0.0285557	-0.237062	0.0283051	-0.123583	-0.255073	-0.103122	-0.159793	-0.329844	0.027117	0.205693	0.197717
AppNL-G-F	12	-0.0322175	-0.830354	-0.304497	-0.215552	0.0451019	0.174241	0.228534	0.319096	-0.170046	0.449504	0.0545989	0.101868	0.092464	-0.13434	0.309741	0.060544	0.105856	0.254725	0.242517	0.323005	-0.0863298	0.0718237	0.0839696	-0.0912967	0.228315	-0.195765	-0.045789	0.262476	-0.169273	-0.0883731	0.218809	-0.0089146	-0.042991	-0.128702	-0.0767269	-0.0023538
AppNL-G-F	12	-0.219676	-0.791852	-0.810058	0.150691	0.0242924	-0.0233138	-0.0843334	-0.188162	-0.250611	-0.168547	-0.292392	-0.25447	-0.0106489	-0.337881	-0.174889	-0.156472	-0.299787	-0.300912	-0.34367	-0.160904	-0.161929	-0.224196	-0.205548	-0.294098	-0.188053	-0.167107	0.0350477	-0.253028	0.38047	0.153694	0.11077	-0.338986	-0.0141981	-0.208176	-0.182856	0.0427319
AppNL-G-F	12	-0.369316	-1	-0.5625	0	-0.352398	0.304649	0.25781	0.303614	0.0888375	0.324134	-0.00291983	0.0436974	0.17197	-0.137838	-0.0730679	0.0113841	0.158087	-0.00540824	-0.0465666	-0.12786	0.0807325	-0.148272	-0.14736	-0.131348	-0.150962	-0.0691972	-0.0561151	0.0330532	-0.150299	-0.147406	-0.102738	-0.081037	-0.224657	-0.0459007	0.089727	0.0153117
AppNL-G-F	12	0.295881	-0.917707	-0.628888	2.51882e-06	-0.304394	0.185954	0.225137	0.0757553	0.0417679	0.0390361	-0.0426709	-0.255349	-0.0605431	-0.108982	-0.102652	-0.0969526	-0.000663206	-0.0314826	-0.0649059	0.0324471	-0.0571632	-0.182595	-0.383821	0.203155	-0.00795865	-0.105099	-0.0425118	-0.0555645	-0.329729	-0.215656	-0.250905	-0.359799	-0.153375	0.239787	0.180358	0.0296504
Control	12	-0.504696	-0.655342	-0.50236	-0.106652	-0.328789	0.417542	-0.217263	-0.430602	-0.403161	-0.225737	-0.201329	-0.157197	-0.396978	-0.203993	-0.0475512	-0.365242	-0.0595251	0.191621	0.100234	-0.161337	-0.307368	-0.229005	-0.26411	-0.186942	-0.134814	-0.182444	-0.271975	-0.115552	-0.0368315	-0.298607	-0.0867028	-0.196971	-0.062479	0.169466	0.216383	-0.106959
Control	12	-0.0626738	-0.808314	-0.787529	-0.230947	-0.249417	0.44282	-0.423918	-0.0538076	-0.0834447	-0.115479	-0.248663	0.139232	-0.281662	-0.0492786	-0.163526	0.260176	0.127175	-0.354653	-0.372358	-0.12223	0.0908899	-0.100196	-0.157375	0.0169769	0.129822	0.152503	-0.116096	0.425238	-0.0360281	-0.421233	-0.0929041	-0.305051	-0.0345603	-0.106492	-0.118171	-0.28784
Control	12	0.0819893	0.00263511	0.107335	0.0112284	0.327473	0.43066	0.348962	0.630645	0.426622	0.22417	-0.025798	-0.0941873	0.0662797	-0.0171196	-0.100744	0.0881397	-0.0122824	-0.111095	-0.150112	-0.143873	-0.168736	-0.0101507	-0.0808386	0.0500751	-0.00493507	0.12191	0.0958525	0.0550934	-0.045815	-0.0414126	-0.0516944	-0.123929	-0.210838	0.113654	0.322972	0.342927
Control	12	-0.610039	-0.969455	-0.521484	-0.192779	0	0.0652694	0.0474775	-0.0838874	-0.0842632	-0.256489	-0.405308	-0.362306	-0.337938	-0.433707	-0.367807	-0.33168	-0.282082	-0.322781	-0.378374	-0.316141	-0.299082	-0.400611	-0.398453	-0.301582	-0.0479662	-0.029284	-0.304587	-0.359124	-0.311172	-0.35362	-0.351754	-0.246272	-0.259302	-0.0453598	-0.0895245	-0.151604
Control	12	-0.405494	-0.90288	-0.859287	-0.27466	-0.155722	0.265008	-0.160871	0.0505474	-0.334382	-0.360537	-0.168577	-0.120559	-0.479099	-0.510554	-0.4794	-0.137914	-0.360321	-0.459873	-0.511547	-0.252613	-0.133287	-0.42368	-0.369512	-0.177934	-0.0996386	-0.0321887	-0.340698	-0.398263	-0.221693	-0.437584	-0.308568	-0.211726	-0.34966	-0.287795	-0.171698	0.184993
Control	12	-0.339712	-0.918963	-0.931929	-0.10859	0.0745511	-0.0338121	0.314403	0.237185	0.0506076	0.21358	-0.0694737	-0.0285159	-0.0135776	0.0272318	-0.0811119	-0.174903	-0.189303	-0.174551	-0.120918	-0.214787	-0.242217	-0.214552	-0.188516	0.016283	0.0668632	-0.215409	-0.214804	-0.21444	-0.188256	-0.160513	-0.173328	-0.160236	-0.213614	-0.12746	-0.170453	0.252336
Control	12	-0.484902	-0.971667	-0.763333	0	-0.115525	0.0201409	0.172958	-0.00397932	0.0789412	-0.317194	-0.187343	-0.335408	-0.305913	-0.233607	-0.301675	-0.188355	-0.228582	-0.297314	-0.197849	-0.253498	-0.127575	-0.306734	-0.292628	0.0080229	-0.0902868	-0.125893	-0.0532648	-0.135027	-0.0372697	-0.146443	-0.187449	-0.228565	-0.173093	0.236676	-0.168845	0.118177
AppNL-G-F	12	0.135	-0.758617	-0.277457	7.88258e-15	-0.107956	0.182469	0.176158	-0.00471149	0.35273	0.228634	0.134557	0.19442	0.178299	0.401944	0.143254	0.148176	-0.028183	0.167779	0.304079	0.0773226	-0.0153249	0.312307	0.109387	0.125623	0.236321	0.0528844	0.362976	0.199749	0.0593466	0.039346	-0.416249	-0.221979	-0.0034483	-0.168889	-0.117335	0.00321631
AppNL-G-F	12	-0.317752	-0.667586	-0.471724	0	-0.0124138	-0.267632	-0.0553383	0.0338887	-0.140097	-0.371812	-0.162059	-0.140595	-0.157292	-0.37137	-0.048471	-0.0723043	-0.11012	0.104556	-0.141163	-0.296756	-0.360697	-0.183903	-0.156617	-0.416836	-0.105226	-0.124045	0.0661338	-0.285618	-0.179253	-0.418388	-0.325543	-0.0936871	-0.161363	0.0550382	0.0201776	-0.256554
AppNL-G-F	12	-0.55798	-0.75	-0.618	-0.174319	0	-0.0666613	0.0437773	0.131852	0.0842293	-0.164119	-0.162858	-0.145835	-0.244974	0.0217716	0.156429	-0.192982	0.25755	-0.00796374	-0.091517	0.00889599	0.275279	-0.206363	-0.240029	-0.347906	-0.288703	-0.0210821	-0.0204788	-0.0361305	-0.201885	-0.119694	0.114467	-0.151394	-0.219269	0.0972434	-0.114433	-0.134
Control	12	-0.400272	-0.996232	-0.866667	-0.0666667	0	-0.178667	-0.224	-0.024	-0.224	-0.0453333	-0.0906667	1.45542e-09	-0.0906667	-0.6	-0.533333	-0.866663	-0.866651	-0.423945	-0.290504	-0.844907	-0.889676	-0.821919	-0.308004	-0.254457	-0.759984	-0.839236	-0.385395	-0.526393	-0.643614	-0.513223	-0.804809	-0.84936	-0.513904	-0.596814	0.0348881	-0.210905
Control	12	-0.41618	-0.899655	-0.624555	0.223085	0.02034	0.336526	-0.410615	-0.185058	0.132127	-0.275757	-0.199603	0.17036	-0.0760007	-0.343948	0.0453211	0.326663	-0.0508201	0.0609266	-0.190061	-0.334332	0.11541	0.245946	-0.432482	0.199081	0.218174	-0.0898418	-0.148486	0.280822	-0.311157	-0.225073	-0.116366	-0.158407	0.161617	0.163657	-0.191939	-0.0333895
Control	12	-0.616681	-0.851111	-0.111111	-0.0501694	-0.246603	-0.344086	-0.129219	-0.296802	-0.342168	0.179568	-0.108074	-0.008592	-0.153929	-0.193988	-0.370859	-0.143891	-0.367834	-0.148571	-0.025415	-0.12668	-0.0452352	-0.222935	-0.217268	-0.170669	-0.14506	0.126242	-0.154972	-0.0529148	-0.25129	-0.264503	-0.114221	-0.277919	-0.108747	-0.0570903	-0.0352105	0.0893444
Control	12	-0.428914	-0.912959	0.115964	-0.0982311	0.247787	0.395706	-0.0923661	-0.28225	-0.115753	-0.26656	-0.360477	-0.41422	-0.348595	-0.283459	-0.259533	-0.315149	-0.0306068	-0.266785	-0.143558	-0.140516	-0.257634	-0.235899	0.00624619	-0.274997	-0.167703	-0.264254	-0.284292	-0.122224	-0.319991	-0.100601	-0.279391	-0.0386058	-0.315888	0.18831	-0.0108636	0.280163
Control	12	-0.420733	-0.97429	-0.865681	-0.0996814	0.179519	0.0510002	0.183838	0.105204	0.341978	-0.0017181	-0.130922	-0.00146498	-0.237949	0.0523714	-0.262994	-0.184043	-0.366928	-0.0797864	-0.287917	-0.262614	-0.208923	0.0277298	0.36848	-0.318082	-0.394317	-0.444754	-0.444709	-0.340568	-0.259545	-0.388335	-0.172008	-0.0881012	-0.398844	0.1735	-0.356306	0.277541
Control	12	-0.62015	-0.68642	-0.42892	-0.156894	0.00883615	0.0331614	0.213981	-0.273062	-0.0564057	0.206774	-0.113373	-0.351324	-0.138898	0.0836918	0.115965	-0.106292	-0.243308	-0.129592	-0.320635	-0.0184071	-0.241811	-0.129704	-0.259081	-0.345471	-0.0405979	-0.144327	-0.219391	-0.294705	-0.435369	-0.218124	-0.391548	-0.512358	-0.48579	-0.195729	-0.150649	0.047503
AppNL-G-F	12	-0.287525	-0.73	-0.5425	-0.0625	6.32855e-06	-0.00898642	-0.20766	0.313083	0.302629	0.260325	0.169497	0.242666	0.148599	0.0305066	-0.213682	-0.271191	-0.0393334	-0.0979783	-0.28203	-0.256419	-0.296089	-0.375999	-0.186115	0.258842	-0.0253393	0.141827	-0.430992	-0.260217	-0.296222	-0.418211	-0.208309	-0.373818	-0.372119	0.055999	-0.108049	-0.0437633
AppNL-G-F	12	-0.235954	-0.576037	-0.654378	0.0259213	-0.201678	-0.101456	0.198461	0.249493	-0.158264	-0.0310435	-0.414744	-0.0182494	-0.447528	-0.420355	-0.240258	0.187616	-0.171044	-0.0902549	0.0291862	-0.349494	-0.270002	-0.421226	-0.206346	0.231162	0.142133	0.114452	-0.276374	-0.308328	-0.400184	0.0274517	-0.239225	-0.391204	-0.119579	-0.0718052	0.0899001	-0.0573008
AppNL-G-F	12	-0.387664	-1	-0.975976	0	-0.249247	-0.39393	-0.407758	-0.304249	-0.213659	-0.320821	-0.148006	-0.230523	-0.166217	-0.290628	-0.043149	-0.37233	0.0479553	-0.208486	0.0477174	-0.235839	-0.269246	-0.25361	-0.161823	-0.251422	0.0824172	0.200921	0.0965764	-0.0231242	0.205515	0.0954821	-0.228287	-0.025383	-0.0374491	-0.0536303	0.183636	0.0866855
AppNL-G-F	12	-0.113818	-0.543105	-0.78177	0.270966	-0.0106002	-0.275997	-0.365748	-0.207503	-0.139594	-0.208365	-0.162413	0.0419933	-0.0732792	-0.00549369	-0.00601339	-0.121285	-0.211962	-0.144164	-0.00805465	0.12806	-0.145654	-0.0313846	-0.0564525	-0.119928	0.0658986	-0.366191	-0.118058	-0.0939984	0.40546	-0.141531	-0.210378	0.289085	-0.00652934	0.0190807	0.138136	0.204688
AppNL-G-F	12	-0.480025	-0.953103	-0.53931	-0.08	4.36009e-08	-0.253107	-0.154047	-0.378901	-0.286793	-0.258333	-0.15267	-0.419555	-0.204527	-0.198221	-0.401752	-0.145963	-0.327256	-0.269646	-0.213028	-0.213865	-0.0555231	-0.357242	-0.314818	-0.083647	-0.107153	-0.337215	-0.359335	-0.223795	0.127839	-0.360269	-0.344328	-0.305525	-0.428569	-0.302154	-0.24609	-0.10846
