# Supplementary material for: Misclassification in memory modification in AppNL-G-F knock-in mouse model of Alzheimer’s disease
Source: eLife. 2025 Nov 4;14:RP105347. doi: 10.7554/eLife.105347 (PMC12585179; doi:10.7554/eLife.105347)
Supplement: Figure 3—source data 1. [file elife-105347-fig3-data1.xlsx]

## Sheet: Figure 3A
	CR		posterior probability of latent cause		associative weight of CS		associative weight of context
Trial	6 m.o. Control_obs	6 m.o. Control_sim	z1	z2	w1	w2	w1	w2
1	0	0.540926	1	0	0.426726	0.00857143	0.0922023	0.00857143
2	0.0890688	1	0.531367	0.468633	0.551287	0.204532	0.117115	0.0477636
3	0.438596	1	0.72491	0.27509	0.770488	0.37575	0.160955	0.0820072
4	0.94332	1	0.774885	0.225115	0.336647	0.303335	0.0741866	0.0675241
5	0.877193	1	0.829092	0.170908	0.213525	0.280456	0.0495622	0.0629484
6	1	1	0.86853	0.13147	0.131534	0.264179	0.0331639	0.0596929
7	0.820513	1	0.892665	0.107335	0.0794242	0.251657	0.022742	0.0571886
8	0.877193	1	0.909059	0.0909413	0.0471723	0.241548	0.0162916	0.0551668
9	1	0.999352	0.920976	0.0790244	0.0275491	0.233115	0.012367	0.0534802
10	0.910931	0.978831	0.930056	0.0699435	0.0157518	0.22591	0.0100075	0.0520392
11	0.831309	0.900107	0.937219	0.0627813	0.00872194	0.219642	0.00860153	0.0507855
12	0.774629	0.790758	0.943018	0.0569816	0.00456148	0.214109	0.00776944	0.049679
13	0.582996	0.693755	0.947814	0.0521863	0.00211258	0.20917	0.00727966	0.0486911
14	0.639676	0.621491	0.951847	0.0481535	0.000677482	0.204716	0.00699264	0.0478003
15	0.595142	0.570444	0.955287	0.0447134	-0.000160414	0.200668	0.00682506	0.0469907
16	0.62888	0.534364	0.958257	0.0417434	-0.000648111	0.196963	0.00672752	0.0462498
17	0.538462	0.508219	0.960847	0.0391528	-0.000931224	0.193552	0.0066709	0.0455675
18	0.527665	0.488599	0.963127	0.0368726	-0.00109519	0.190395	0.0066381	0.0449361
19	0.5722	0.473316	0.96515	0.0348499	-0.00118997	0.187459	0.00661915	0.0443489
20	0.483131	0.460989	0.966957	0.0330431	-0.00124466	0.184718	0.00660821	0.0438008
21	0.449393	0.450744	0.968581	0.031419	-0.00127616	0.18215	0.00660191	0.0432871
22	0.426451	0.442018	0.970049	0.0299512	-0.00129429	0.179735	0.00659829	0.0428042
23	0.426451	0.434442	0.971378	0.0286221	-0.00131067	0.17521	0.00659501	0.0418992
24	0.470985	0.432817	0.970955	0.0290454	-0.00131409	0.172957	0.00659433	0.0414486
25	0.651822	0.425687	0.972357	0.0276432	-0.00131605	0.17084	0.00659393	0.0410252
26	0.392713	0.419501	0.973589	0.0264109	-0.00131718	0.168842	0.00659371	0.0406256
27	0.415655	0.414023	0.974695	0.0253047	-0.00131782	0.16695	0.00659358	0.0402472
28	0.303644	0.409118	0.975699	0.0243007	-0.00131819	0.165154	0.0065935	0.0398879
29	0.325236	0.40469	0.976618	0.0233825	-0.0013184	0.163443	0.00659346	0.0395458
30	0.325236	0.400667	0.977462	0.022538	-0.00131852	0.161812	0.00659344	0.0392195
31	0.392713	0.396994	0.978242	0.0217576	-0.00131859	0.160252	0.00659342	0.0389076
32	0.280702	0.393625	0.978966	0.0210337	-0.00131863	0.158759	0.00659342	0.0386089
33	0.269906	0.390523	0.979638	0.0203616	-0.00131866	0.155907	0.00659341	0.0380386
34	0.336032	0.389913	0.97944	0.0205596	-0.00131868	0.15308	0.00659341	0.0374731
35	0.221323	0.35607	0.928645	0.0713553	-0.00131868	0.15308	0.16207	0.0494621
36	0.820513	0.919358	0.980015	0.0199851	-0.0141939	0.151703	0.159495	0.0491868

## Sheet: Figure 3B
	CR		posterior probability of latent cause		associative weight of CS		associative weight of context
Trial	6 m.o. AppNL-G-F_obs	6 m.o. AppNL-G-F_sim	z1	z2	w1	w2	w1	w2
1	0	0.303339	1	0	0.506576	0.004	0.104515	0.004
2	0.139423	1	0.791695	0.208305	0.695493	0.108689	0.142299	0.0249378
3	0.338942	1	0.885599	0.114401	0.885074	0.207513	0.180215	0.0447025
4	1	1	0.627696	0.372304	0.407924	0.131101	0.0847847	0.0294202
5	0.721154	1	0.659238	0.340762	0.266474	0.107528	0.0564949	0.0247056
6	0.819712	1	0.866954	0.133046	0.144862	0.0999712	0.0321724	0.0231942
7	0.819712	1	0.907796	0.0922044	0.0755021	0.0951002	0.0183004	0.02222
8	0.639423	0.999741	0.926033	0.0739665	0.0384822	0.0913819	0.0108964	0.0214764
9	0.721154	0.939729	0.936684	0.063316	0.0192483	0.0883227	0.00704965	0.0208645
10	0.620192	0.702225	0.94382	0.0561804	0.00940197	0.0856985	0.00508039	0.0203397
11	0.560096	0.497369	0.949006	0.0509937	0.00440914	0.0833868	0.00408183	0.0198774
12	0.540865	0.386249	0.952984	0.0470163	0.00189433	0.0813126	0.00357887	0.0194625
13	0.5	0.33027	0.956152	0.0438483	0.000634025	0.0794258	0.0033268	0.0190852
14	0.600962	0.301271	0.958748	0.0412522	4.9042e-06	0.0776917	0.00320098	0.0187383
15	0.439904	0.285397	0.960923	0.0390771	-0.000308141	0.0760846	0.00313837	0.0184169
16	0.459135	0.27608	0.962778	0.0372219	-0.000463499	0.0745852	0.0031073	0.018117
17	0.360577	0.27015	0.964384	0.0356163	-0.000540428	0.0731785	0.00309191	0.0178357
18	0.459135	0.266038	0.96579	0.0342097	-0.000578449	0.0718526	0.00308431	0.0175705
19	0.379808	0.262951	0.967035	0.0329646	-0.000597208	0.070598	0.00308056	0.0173196
20	0.420673	0.260478	0.968147	0.0318526	-0.00060645	0.0694067	0.00307871	0.0170813
21	0.439904	0.258402	0.969148	0.0308517	-0.000610998	0.0682721	0.0030778	0.0168544
22	0.5	0.256601	0.970055	0.0299448	-0.000613233	0.0671887	0.00307735	0.0166377
23	0.21875	0.255004	0.97088	0.0291196	-0.000614868	0.0651306	0.00307703	0.0162261
24	0.300481	0.296993	0.934982	0.0650182	-0.000615122	0.0628856	0.00307698	0.0157771
25	0.360577	0.275431	0.950924	0.0490765	-0.000615253	0.0612488	0.00307695	0.0154498
26	0.259615	0.266467	0.957617	0.0423834	-0.000615319	0.0598718	0.00307694	0.0151744
27	0.180288	0.261056	0.961653	0.0383466	-0.000615352	0.0586536	0.00307693	0.0149307
28	0.240385	0.25727	0.964469	0.0355308	-0.000615369	0.0575476	0.00307693	0.0147095
29	0.158654	0.2544	0.966597	0.0334033	-0.000615377	0.0565272	0.00307692	0.0145054
30	0.21875	0.25211	0.968288	0.0317121	-0.000615381	0.0555755	0.00307692	0.0143151
31	0.0600962	0.25022	0.96968	0.0303196	-0.000615383	0.0546807	0.00307692	0.0141361
32	0.0192308	0.248619	0.970857	0.029143	-0.000615384	0.0538343	0.00307692	0.0139669
33	0.120192	0.247236	0.97187	0.0281297	-0.000615384	0.0522374	0.00307692	0.0136475
34	0.158654	0.271625	0.94496	0.0550396	-0.000615385	0.049226	0.00307692	0.0130452
35	0.298077	0.241316	0.68974	0.31026	-0.000615385	0.049226	0.141241	0.0754661
36	0.680288	0.795677	0.92659	0.0734096	-0.0135456	0.0468416	0.138655	0.0749893

## Sheet: Figure 3C
	CR		posterior probability of latent cause				associative weight of CS				associative weight of context
Trial	12 m.o. Control_obs	12 m.o. Control_sim	z1	z2	z3	z4	w1	w2	w3	w4	w1	w2	w3	w4
1	0	0.524252	1	0	0	0	0.823325	0.00909091	0.00909091	0.00909091	0.171938	0.00909091	0.00909091	0.00909091
2	0	1	0.731747	0.268253	0	0	0.909037	0.227511	0.00909091	0.00909091	0.18908	0.052775	0.00909091	0.00909091
3	0.330409	1	0.806142	0.193858	0	0	0.960008	0.653062	0.00909091	0.00909091	0.199274	0.137885	0.00909091	0.00909091
4	0.976608	1	0.331577	0.668423	0	0	0.194115	0.00680552	0.00909091	0.00909091	0.0460958	0.00863383	0.00909091	0.00909091
5	0.755848	0.98796	0.193339	0.0921826	0.714478	0	0.161753	0.00615804	0.00267452	0.00909091	0.0396233	0.00850433	0.00780763	0.00909091
6	0.902047	0.702449	0.0758777	0.0352869	0.603399	0.285436	0.151154	0.00592975	0.000570363	0.00652754	0.0375035	0.00845868	0.0073868	0.00857824
7	0.538012	0.525437	0.0484589	0.0220645	0.743557	0.18592	0.144825	0.00579131	-0.000683061	0.00526591	0.0362377	0.00843099	0.00713612	0.00832591
8	0.440058	0.443416	0.0374031	0.0167028	0.799542	0.146352	0.140143	0.0056885	-0.00117286	0.00443086	0.0353012	0.00841043	0.00703815	0.0081589
9	0.548246	0.40288	0.0313492	0.013748	0.829839	0.125064	0.136344	0.00560508	-0.00133324	0.00380668	0.0345415	0.00839374	0.00700608	0.00803406
10	0.353801	0.38045	0.027454	0.011837	0.849078	0.111631	0.133106	0.0055341	-0.00138075	0.0033092	0.033894	0.00837955	0.00699658	0.00793457
11	0.232456	0.366237	0.0246911	0.0104771	0.862541	0.102291	0.130263	0.00547192	-0.00139393	0.00289691	0.0333253	0.00836711	0.00699394	0.00785211
12	0.390351	0.356184	0.0226005	0.00944677	0.872588	0.0953643	0.127715	0.00541635	-0.00139742	0.0025462	0.0328158	0.008356	0.00699324	0.00778197
13	0.318713	0.348532	0.0209452	0.00863122	0.880438	0.0899855	0.1254	0.00536599	-0.00139831	0.00224229	0.0323527	0.00834593	0.00699307	0.00772119
14	0.342105	0.34243	0.0195899	0.00796473	0.886782	0.0856632	0.123273	0.00531986	-0.00139853	0.00197527	0.0319274	0.0083367	0.00699302	0.00766778
15	0.232456	0.33741	0.0184514	0.00740668	0.892045	0.0820969	0.121304	0.00527726	-0.00139858	0.00173813	0.0315335	0.00832818	0.00699301	0.00762035
16	0.342105	0.333186	0.0174758	0.00693051	0.896502	0.079092	0.119468	0.00523765	-0.0013986	0.00152573	0.0311663	0.00832026	0.00699301	0.00757787
17	0.342105	0.32957	0.0166262	0.00651799	0.900339	0.0765166	0.117748	0.00520062	-0.0013986	0.00133416	0.0308223	0.00831285	0.00699301	0.00753956
18	0.317251	0.326431	0.0158766	0.00615616	0.903689	0.074278	0.116128	0.00516583	-0.0013986	0.00116038	0.0304983	0.00830589	0.00699301	0.0075048
19	0.207602	0.323675	0.0152081	0.00583551	0.906647	0.072309	0.114598	0.00513304	-0.0013986	0.00100196	0.0301923	0.00829933	0.00699301	0.00747312
20	0.292398	0.321232	0.0146064	0.00554888	0.909285	0.0705596	0.113147	0.00510201	-0.0013986	0.000856943	0.0299022	0.00829313	0.00699301	0.00744412
21	0.232456	0.319048	0.0140606	0.00529076	0.911657	0.0689918	0.111768	0.00507256	-0.0013986	0.000723716	0.0296264	0.00828724	0.00699301	0.00741747
22	0.29386	0.317083	0.0135623	0.0050568	0.913805	0.0675761	0.110454	0.00504455	-0.0013986	0.000600929	0.0293636	0.00828164	0.00699301	0.00739291
23	0.195906	0.315303	0.0131086	0.00484354	0.915759	0.0662891	0.104318	0.00491206	-0.0013986	9.43829e-05	0.0281363	0.00825514	0.00699301	0.0072916
24	0.403509	0.371773	0.0351439	0.0114717	0.720177	0.233208	0.101137	0.00485008	-0.0013986	-0.000203705	0.0275002	0.00824274	0.00699301	0.00723199
25	0.488304	0.326825	0.0191404	0.00622142	0.846229	0.128409	0.099457	0.0048168	-0.0013986	-0.000335068	0.0271641	0.00823609	0.00699301	0.00720571
26	0.5	0.316567	0.0153377	0.00496532	0.875671	0.104026	0.0981326	0.00479037	-0.0013986	-0.000429787	0.0268993	0.0082308	0.00699301	0.00718677
27	0.353801	0.311448	0.0134346	0.00433229	0.890126	0.092107	0.0969878	0.00476742	-0.0013986	-0.000506185	0.0266703	0.00822621	0.00699301	0.00717149
28	0.328947	0.308191	0.012226	0.00392768	0.899125	0.0847214	0.095958	0.00474669	-0.0013986	-0.000570915	0.0264643	0.00822206	0.00699301	0.00715854
29	0.25731	0.305853	0.011361	0.00363638	0.90544	0.079563	0.0950111	0.00472755	-0.0013986	-0.000627295	0.0262749	0.00821824	0.00699301	0.00714727
30	0.207602	0.304052	0.0106956	0.00341118	0.910203	0.0756898	0.0941282	0.00470966	-0.0013986	-0.000677276	0.0260984	0.00821466	0.00699301	0.00713727
31	0.195906	0.302596	0.0101587	0.0032287	0.913976	0.0726369	0.0932974	0.00469278	-0.0013986	-0.000722134	0.0259322	0.00821128	0.00699301	0.0071283
32	0.159357	0.30138	0.00971058	0.00307582	0.917068	0.0701457	0.0925101	0.00467674	-0.0013986	-0.000762759	0.0257748	0.00820807	0.00699301	0.00712018
33	0.280702	0.30034	0.00932839	0.00294456	0.919668	0.0680587	0.0888199	0.00460054	-0.0013986	-0.000927639	0.0250367	0.00819284	0.00699301	0.0070872
34	0.561404	0.330921	0.0243489	0.00728398	0.753476	0.214891	0.0798018	0.0044158	-0.0013986	-0.00122819	0.0232331	0.00815589	0.00699301	0.00702709
35	0.359649	0.310681	0.0220639	0.00901327	0.404284	0.564639	0.0798018	0.0044158	-0.0013986	-0.00122819	0.0415566	0.0156739	0.331331	0.453183
36	1	0.999526	0.0411057	0.0115902	0.910257	0.0370467	0.0768202	0.00434376	-0.0500063	-0.00395491	0.0409602	0.0156594	0.32161	0.452638

## Sheet: Figure 3D
	CR		posterior probability of latent cause					associative weight of CS					associative weight of context
Trial	12 m.o. AppNL-G-F_obs	12 m.o. AppNL-G-F_sim	z1	z2	z3	z4	z5	w1	w2	w3	w4	w5	w1	w2	w3	w4	w5
1	0	0.247983	1	0	0	0	0	0.043971	0.0025	0.0025	0.0025	0.0025	0.0107942	0.0025	0.0025	0.0025	0.0025
2	0.0204604	0.991378	0.838101	0.161899	0	0	0	0.0772242	0.00921411	0.0025	0.0025	0.0025	0.0174448	0.00384282	0.0025	0.0025	0.0025
3	0.383632	1	0.910586	0.0894135	0	0	0	0.145434	0.0166283	0.0025	0.0025	0.0025	0.0310868	0.00532566	0.0025	0.0025	0.0025
4	1	1	0.416864	0.583136	0	0	0	0.140223	0.0157808	0.0025	0.0025	0.0025	0.0300445	0.00515615	0.0025	0.0025	0.0025
5	0.851662	0.986457	0.224854	0.115095	0.66005	0	0	0.138855	0.0157003	0.00241763	0.0025	0.0025	0.029771	0.00514005	0.00248353	0.0025	0.0025
6	0.723785	0.484428	0.0508529	0.0253592	0.77069	0.153098	0	0.138548	0.0156826	0.00232421	0.0024809	0.0025	0.0297097	0.00513652	0.00246484	0.00249618	0.0025
7	0.616368	0.373794	0.0293636	0.0142916	0.865722	0.0906224	0	0.138372	0.0156727	0.00222276	0.00246966	0.0025	0.0296744	0.00513454	0.00244455	0.00249393	0.0025
8	0.639386	0.336139	0.0221155	0.0105219	0.897432	0.0699303	0	0.138239	0.0156654	0.00212154	0.00246103	0.0025	0.0296479	0.00513308	0.00242431	0.00249221	0.0025
9	0.404092	0.315971	0.0184081	0.00857319	0.913412	0.0596067	0	0.138129	0.0156594	0.00202251	0.00245369	0.0025	0.0296258	0.00513188	0.0024045	0.00249074	0.0025
10	0.424552	0.302603	0.0161003	0.00734946	0.92319	0.0533606	0	0.138032	0.0156543	0.00192638	0.00244714	0.0025	0.0296065	0.00513086	0.00238528	0.00248943	0.0025
11	0.383632	0.292635	0.0144917	0.00649128	0.929881	0.0491359	0	0.137946	0.0156498	0.00183341	0.00244112	0.0025	0.0295891	0.00512996	0.00236668	0.00248822	0.0025
12	0.404092	0.284653	0.0132859	0.00584586	0.934804	0.0460641	0	0.137866	0.0156458	0.00174372	0.00243549	0.0025	0.0295732	0.00512915	0.00234874	0.0024871	0.0025
13	0.296675	0.277959	0.0123354	0.00533679	0.938613	0.0437146	0	0.137792	0.0156421	0.0016573	0.00243015	0.0025	0.0295585	0.00512841	0.00233146	0.00248603	0.0025
14	0.340153	0.27217	0.0115585	0.00492132	0.941671	0.0418494	0	0.137723	0.0156387	0.00157412	0.00242506	0.0025	0.0295447	0.00512773	0.00231482	0.00248501	0.0025
15	0.511509	0.267051	0.0109058	0.00457349	0.944195	0.0403259	0	0.137658	0.0156355	0.00149411	0.00242016	0.0025	0.0295316	0.0051271	0.00229882	0.00248403	0.0025
16	0.340153	0.262455	0.0103457	0.00427652	0.946325	0.0390532	0	0.137596	0.0156325	0.0014172	0.00241542	0.0025	0.0295193	0.0051265	0.00228344	0.00248308	0.0025
17	0.360614	0.258279	0.00985706	0.00401901	0.948154	0.0379704	0	0.137537	0.0156297	0.0013433	0.00241082	0.0025	0.0295075	0.00512595	0.00226866	0.00248216	0.0025
18	0.340153	0.25445	0.00942484	0.00379289	0.949747	0.0370353	0	0.137481	0.0156271	0.00127231	0.00240634	0.0025	0.0294963	0.00512542	0.00225446	0.00248127	0.0025
19	0.319693	0.250916	0.00903829	0.00359227	0.951152	0.0362176	0	0.137427	0.0156246	0.00120413	0.00240197	0.0025	0.0294855	0.00512492	0.00224083	0.00248039	0.0025
20	0.340153	0.247635	0.00868937	0.00341273	0.952403	0.0354949	0	0.137376	0.0156223	0.00113867	0.00239769	0.0025	0.0294751	0.00512445	0.00222773	0.00247954	0.0025
21	0.232737	0.244577	0.00837196	0.00325087	0.953527	0.0348502	0	0.137326	0.01562	0.00107584	0.00239349	0.0025	0.0294651	0.005124	0.00221517	0.0024787	0.0025
22	0.212276	0.241716	0.00808129	0.00310401	0.954544	0.0342706	0	0.137278	0.0156179	0.00101553	0.00238938	0.0025	0.0294555	0.00512357	0.00220311	0.00247788	0.0025
23	0.296675	0.23903	0.00781361	0.00297004	0.95547	0.0337459	0	0.137184	0.0156137	0.000902178	0.00238128	0.0025	0.0294369	0.00512275	0.00218044	0.00247626	0.0025
24	0.424552	0.339589	0.030608	0.0100244	0.776071	0.183296	0	0.137002	0.0156068	0.000858977	0.00235935	0.0025	0.0294005	0.00512136	0.0021718	0.00247187	0.0025
25	0.468031	0.250131	0.0113767	0.00370782	0.915869	0.0690466	0	0.136935	0.0156042	0.000809705	0.00235116	0.0025	0.0293869	0.00512085	0.00216194	0.00247023	0.0025
26	0.360614	0.237732	0.00872386	0.00282978	0.934795	0.0536509	0	0.136883	0.0156023	0.000761409	0.00234481	0.0025	0.0293766	0.00512046	0.00215228	0.00246896	0.0025
27	0.212276	0.231647	0.00754484	0.0024361	0.943009	0.0470104	0	0.136838	0.0156006	0.000714657	0.00233926	0.0025	0.0293676	0.00512012	0.00214293	0.00246785	0.0025
28	0.255754	0.227578	0.00683676	0.00219761	0.947813	0.0431523	0	0.136797	0.0155991	0.000669585	0.00233417	0.0025	0.0293595	0.00511982	0.00213392	0.00246683	0.0025
29	0.319693	0.224456	0.00634567	0.00203089	0.951056	0.0405673	0	0.13676	0.0155977	0.000626213	0.0023294	0.0025	0.029352	0.00511953	0.00212524	0.00246588	0.0025
30	0.104859	0.221878	0.00597512	0.0019042	0.953437	0.0386836	0	0.136724	0.0155964	0.000584521	0.00232486	0.0025	0.0293449	0.00511927	0.0021169	0.00246497	0.0025
31	0.084399	0.219655	0.0056797	0.0018026	0.955285	0.0372328	0	0.136691	0.0155951	0.000544471	0.00232049	0.0025	0.0293381	0.00511902	0.00210889	0.0024641	0.0025
32	0.212276	0.217683	0.00543495	0.00171799	0.956776	0.0360707	0	0.136658	0.0155939	0.000506017	0.00231627	0.0025	0.0293317	0.00511878	0.0021012	0.00246325	0.0025
33	0.148338	0.215902	0.00522638	0.00164559	0.958016	0.0351122	0	0.136596	0.0155916	0.000433725	0.00230807	0.0025	0.0293193	0.00511833	0.00208674	0.00246161	0.0025
34	0.319693	0.282112	0.0206153	0.00608789	0.799094	0.174203	0	0.136352	0.0155832	0.000378125	0.00226764	0.0025	0.0292705	0.00511665	0.00207563	0.00245353	0.0025
35	0.219949	0.186475	0.00879265	0.00559515	0.125547	0.860066	0	0.136352	0.0155832	0.000378125	0.00226764	0.0025	0.029416	0.00520968	0.00416415	0.0167455	0.0025
36	0.468031	0.321141	0.0255003	0.00701249	0.648627	0.0125422	0.306318	0.136201	0.0155784	0.000345453	0.00226471	0.00246178	0.0293858	0.00520871	0.00415761	0.0167449	0.00249236
