# Supplementary material for: Misclassification in memory modification in AppNL-G-F knock-in mouse model of Alzheimer’s disease
Source: eLife. 2025 Nov 4;14:RP105347. doi: 10.7554/eLife.105347 (PMC12585179; doi:10.7554/eLife.105347)
Supplement: Figure 4—source data 1. [file elife-105347-fig4-data1.xlsx]

## Sheet: Figure 4A
		Estimated latent cause model parameters
Genotype	Age	alpha	g	eta	maxIter	w0	sr	sx	theta	lambda	K
Control	12	2.5217	1.9403	0.0199	5	0.009	2.5017	2.9502	0.0079211	0.01982	31
Control	12	2.878	1.9801	0.28225	4	0.0010526	1.505	2.9547	0.00218	0.01946	32
Control	12	2.95455	1.9801	0.328214	1.54545	0.0075	2.59227	2.77575	0.0191562	0.011	10.3605
Control	12	1.03226	1.93511	0.100918	4	0.00785714	2.50167	2.06562	0.012125	0.0195714	33.6351
Control	12	1.1	1.9005	0.0199	1.66667	-0.00125	0.335	0.595	0.00875	0.0188158	35.65
Control	12	2.07143	1.9801	0.0199	1.11111	0.0094	2.701	1.62958	0.0065	0.01982	17.45
Control	12	1.42857	1.005	0.0775	4.875	0.00166667	2.2525	0.882083	0.00407692	0.0197353	32.9118
AppNL-G-F	12	1.06522	1.0647	0.0397	1.46154	0.004	2.2525	0.3389	0.005	0.0198125	35.65
AppNL-G-F	12	1.06	1.16745	0.307	2	-0.00477273	0.7575	0.0997	0.00719231	0.01025	35.65
AppNL-G-F	12	1.0625	1.42596	0.0397	1.66667	-4.34e-19	1.505	0.355	0.00842857	0.0197955	35.65
AppNL-G-F	12	1.6	0.720714	0.505	1.14286	0.00666667	2.2525	0.650714	0.00161956	0.0196481	32.5
AppNL-G-F	12	2.97436	0.8259	0.1387	2	0.0098	2.935	0.985	0.0194	0.011	3.45
AppNL-G-F	12	1.1	1.9801	0.0199	4.33333	2.17e-19	0.508333	0.444032	0.00875	0.01982	35.5
AppNL-G-F	12	1.02857	1.15808	0.0397	4.33333	-0.0025	2.50167	0.164655	0.0146	0.0183421	35.6023
AppNL-G-F	12	1.1	1.9403	0.0397	2	-0.0025	2.2525	0.38375	0.006125	0.01982	35.65
AppNL-G-F	12	1.41667	1.62688	0.929286	4.9	0.009375	0.176111	0.358833	0.0155	0.019069	34.125
AppNL-G-F	12	1.0625	1.07607	0.0630357	2	0.004	0.7575	0.259167	0.00936364	0.0197353	25.5
Control	12	1.1	1.005	0.0199	1.4	0.007	0.632917	1.505	0.00823077	0.014375	14.125
Control	12	1.06	1.63043	0.703	2	0.00461538	2.50167	0.0399	0.00434	0.019449	35.0278
Control	12	2.97561	1.66833	0.0199	1.92	-0.0098	2.04864	2.33118	0.01874	0.012875	2.75
Control	12	2.8	1.17083	0.195625	4.33333	0.00977273	2.71716	2.025	0.00684615	0.0174688	3.45
Control	12	1.07317	1.9801	0.0793	1.25	0.0094	0.0399	1.25583	0.00507895	0.01946	1.35
Control	12	1.02	1.06719	0.938125	4	0.00615385	1.25583	0.0997	0.011	0.0155	34.75
Control	12	1.33333	1.17804	0.9175	4.33333	0.00666667	0.7575	0.154677	0.00875	0.0198125	25.3056
AppNL-G-F	12	1.03571	1.005	0.102813	1.33333	-4.34e-19	0.7575	0.290312	0.0065	0.0197097	35.3966
AppNL-G-F	12	1.10417	1.35109	0.1585	2	-4.34e-19	0.7575	0.0399	0.00570588	0.01982	35.6196
AppNL-G-F	12	1.5	1.97969	0.95875	3.8	0.00857143	0.0633929	1.22469	0.0075	0.0191	1.35
Control	12	1.75	0.543036	0.0605102	1.42857	0.005	0.689545	0.0399	0.011	0.0197907	35.65
Control	12	2.9	1.09152	0.102813	4	0.00444444	0.7575	0.7575	0.00531579	0.01925	4.5
Control	12	1.83333	1.005	0.2575	1.66667	0.0088	1.87875	1.83722	0.00596	0.0155	7.5625
Control	12	2.88	1.97789	0.0793	1.18182	0.00526316	0.585	1.07786	0.00782353	0.01982	4.15
Control	12	2.7619	1.89415	0.12837	4.33333	0.0024	2.68854	2.91694	0.0029	0.01982	27.0556
Control	12	2.76923	0.5075	0.0397	1.32258	0.0098	2.62625	2.50167	0.00580769	0.01946	5.14474
AppNL-G-F	12	1.06	1.15132	0.145	4.85714	-4.34e-19	2.103	0.223571	0.0065	0.0195909	35.125
AppNL-G-F	12	2.66667	1.19156	0.809615	1.66667	0.00388889	0.7575	1.75417	0.0081875	0.01982	5.55
AppNL-G-F	12	1.03448	1.23717	0.164687	4	0.00705882	0.7575	0.1595	0.011	0.01982	32.25
AppNL-G-F	12	1.06	1.9801	0.0199	3	-0.00181818	0.7575	0.417727	0.0047931	0.01982	35.5833
AppNL-G-F	12	1.1	1.15808	0.0807143	1.28571	0.00928571	2.2525	0.101531	0.005	0.0144286	14.125
