# Supplementary material for: Misclassification in memory modification in AppNL-G-F knock-in mouse model of Alzheimer’s disease
Source: eLife. 2025 Nov 4;14:RP105347. doi: 10.7554/eLife.105347 (PMC12585179; doi:10.7554/eLife.105347)
Supplement: Figure 4—source data 2. [file elife-105347-fig4-data2.xlsx]

## Sheet: Figure 4C-4H
		Latent causes acquired during acquisition phase				Latent causes acquired during extinction phase				Latent causes acquired after extinction phase
		Figure 4C		Figure 4F		Figure 4D		Figure 4E		Figure 4G		Figure 4H
Genotype	Age	K	P	Wcs	Wcontext	K	P	Wcs	Wcontext	K	P	Wcs	Wcontext
Control	12	3	0.0177251	0.161957	0.0543379	28	0.982275	0.241922	0.269497	0	0	NaN	NaN
Control	12	3	0.0160424	1.35002	0.276303	29	0.983958	0.015391	0.248899	0	0	NaN	NaN
Control	12	3	0.0137845	1.1664	0.253356	8	0.986216	0.0196371	0.180247	0	0	NaN	NaN
Control	12	2	0.000323195	0.466348	0.105871	3	0.00929742	0.00362796	0.0207153	2	0.990379	0.0147673	0.0944974
Control	12	2	0.000699716	0.0749047	0.0129848	3	0.0207329	-0.00288572	-0.00344727	2	0.978567	-0.0024709	0.00533097
Control	12	3	0.0136158	0.106237	0.0439364	15	0.986384	0.133632	0.147341	0	0	NaN	NaN
Control	12	2	0.0212549	0.391735	0.0824929	2	0.406733	0.000416375	0.0784663	1	0.572012	0.001578	0.00164894
AppNL-G-F	12	2	0.0291613	0.150175	0.0367569	2	0.579873	0.0041438	0.0227664	1	0.390966	0.0039255	0.0039851
AppNL-G-F	12	2	0.0303262	0.486498	0.090244	2	0.714608	-0.0023077	0.113506	1	0.255065	-0.00432425	-0.00468303
AppNL-G-F	12	2	0.0091288	0.147514	0.029574	3	0.203712	-8.69e-07	0.00136474	2	0.787159	-1.55e-06	0.0144328
AppNL-G-F	12	2	0.0419857	0.417325	0.103102	2	0.958014	-0.0110367	0.20025	0	0	NaN	NaN
AppNL-G-F	12	3	0.0325702	0.504676	0.127139	1	0.96743	-0.0028637	0.059822	0	0	NaN	NaN
AppNL-G-F	12	2	0.000582011	0.130662	0.026139	3	0.0184153	-6.18e-09	0.000230567	2	0.981003	-2.36e-07	0.0196318
AppNL-G-F	12	2	0.0301756	0.219708	0.0403616	2	0.635401	-0.00239338	0.0347151	1	0.334424	-0.00246017	-0.00249203
AppNL-G-F	12	2	0.000795778	0.145092	0.0250247	3	0.0244673	-0.00447409	-0.00668921	2	0.974737	-0.00488434	0.0106868
AppNL-G-F	12	2	0.000846002	0.935911	0.203197	3	0.0745873	-0.00443695	0.0426877	2	0.924567	0.00814872	0.858688
AppNL-G-F	12	2	0.0304312	0.218673	0.0506058	2	0.619464	0.00323425	0.0317481	1	0.350105	0.00389407	0.00397881
Control	12	2	0.0214891	0.0891767	0.0292048	2	0.396951	0.00957461	0.0208929	1	0.581559	0.00690279	0.00698056
Control	12	2	0.0159954	0.464403	0.10027	2	0.465312	0.000641005	0.284535	1	0.518692	0.00259584	0.00421148
Control	12	3	1	0.0423648	-0.00708052	0	0	NaN	NaN	0	0	NaN	NaN
Control	12	3	0.027579	1.05942	0.241975	1	0.972421	-0.00857095	0.191872	0	0	NaN	NaN
Control	12	2	1	0.271643	0.100986	0	0	NaN	NaN	0	0	NaN	NaN
Control	12	2	0.829287	-0.00253628	0.720367	0	0	NaN	NaN	1	0.170713	0.0049712	0.00591732
Control	12	2	0.0268134	0.106182	0.0380033	2	0.571142	-0.00812648	0.861828	1	0.402044	0.00371566	0.00607647
AppNL-G-F	12	2	0.0336893	0.306167	0.0622793	2	0.66872	-0.000164532	0.0399905	1	0.297591	-4.18e-19	-4.31e-19
AppNL-G-F	12	2	0.752382	0.348824	0.0697661	1	0.000134918	-2.7e-07	0.0631976	1	0.247483	-4.14e-19	-4.3e-19
AppNL-G-F	12	2	1	0.822059	0.902064	0	0	NaN	NaN	0	0	NaN	NaN
Control	12	2	0.986013	0.0332555	0.0387948	0	0	NaN	NaN	1	0.0139867	0.00499492	0.00499898
Control	12	3	0.0253846	0.565258	0.127096	2	0.974615	0.00042727	0.0855372	0	0	NaN	NaN
Control	12	3	0.0318038	0.875079	0.200212	5	0.968196	0.0121307	0.135944	0	0	NaN	NaN
Control	12	3	0.0117091	0.32085	0.0773352	2	0.988291	0.00332831	0.0401969	0	0	NaN	NaN
Control	12	3	0.017591	0.791082	0.166277	25	0.982409	0.0445642	0.182532	0	0	NaN	NaN
Control	12	3	0.048174	0.177451	0.0599343	3	0.951826	0.0191414	0.0422656	0	0	NaN	NaN
AppNL-G-F	12	2	0.0265101	0.491764	0.100229	2	0.576321	-0.000379701	0.141788	1	0.397169	-4.04e-19	-4.28e-19
AppNL-G-F	12	3	0.0197166	2.05481	0.431208	3	0.980283	-0.0474894	0.307691	0	0	NaN	NaN
AppNL-G-F	12	2	0.0227573	0.507175	0.113667	2	0.5662	0.00277082	0.141352	1	0.411043	0.00648542	0.00694414
AppNL-G-F	12	2	0.000635936	0.0921501	0.0155251	3	0.0200306	-0.00409715	-0.00504136	2	0.979333	-0.00359399	0.00816134
AppNL-G-F	12	2	0.0337542	0.264223	0.0678614	2	0.709625	0.00739456	0.0483539	1	0.256621	0.00905491	0.00923955

## Sheet: Figure 4—figure supplement 3
		Latent causes acquired during acquisition phase
Genotype	Age	Simulated CR	P	Wcs	Wcontext
Control	12	0.560909	0.00333077	0.162057	0.0540114
Control	12	0.506392	0.00239272	1.3587	0.274266
Control	12	0.202962	0.00246536	1.17415	0.25283
Control	12	1	1	0.467298	0.106031
Control	12	0.648408	1	0.0749464	0.0129893
Control	12	0.59746	0.00414704	0.106281	0.0438163
Control	12	1	1	0.409671	0.0846008
AppNL-G-F	12	0.998212	1	0.153855	0.0371711
AppNL-G-F	12	1	1	0.581324	0.108628
AppNL-G-F	12	0.930866	1	0.148653	0.0297306
AppNL-G-F	12	1	1	0.747709	0.160208
AppNL-G-F	12	0.867338	0.110932	0.540795	0.131679
AppNL-G-F	12	0.834852	1	0.130732	0.0261463
AppNL-G-F	12	1	1	0.2257	0.0411401
AppNL-G-F	12	0.849309	1	0.145257	0.0250514
AppNL-G-F	12	1	1	0.942024	0.203405
AppNL-G-F	12	0.999997	1	0.227547	0.0519094
Control	12	0.975133	1	0.0900624	0.0292125
Control	12	1	1	0.557893	0.118963
Control	12	0.412408	1	0.0499327	-0.0135335
Control	12	0.850485	0.0330184	1.13459	0.250373
Control	12	0.837512	1	0.294477	0.0739353
Control	12	1	1	0.0599549	0.0218371
Control	12	1	1	0.19356	0.0493787
AppNL-G-F	12	1	1	0.330391	0.0660782
AppNL-G-F	12	1	1	0.414781	0.0829562
AppNL-G-F	12	0.740319	1	0.95889	0.205492
Control	12	1	1	0.205727	0.0491455
Control	12	0.733548	0.0595701	0.574904	0.125647
Control	12	0.976836	0.0821903	0.919195	0.204959
Control	12	0.477128	0.00349308	0.321319	0.0768954
Control	12	0.51924	0.00346178	0.794185	0.164597
Control	12	0.809672	0.207859	0.182804	0.0600808
AppNL-G-F	12	1	1	0.536477	0.107295
AppNL-G-F	12	0.877304	0.0239883	2.19363	0.448059
AppNL-G-F	12	1	1	0.546719	0.120638
AppNL-G-F	12	0.729034	1	0.092197	0.0155303
AppNL-G-F	12	1	1	0.278726	0.0706023
