# Supplementary material for: Misclassification in memory modification in AppNL-G-F knock-in mouse model of Alzheimer’s disease
Source: eLife. 2025 Nov 4;14:RP105347. doi: 10.7554/eLife.105347 (PMC12585179; doi:10.7554/eLife.105347)
Supplement: Figure 5—source data 1. [file elife-105347-fig5-data1.xlsx]

## Sheet: Figure 5A
		Estimated latent cause model parameters
Genotype	Age	alpha	g	eta	maxIter	w0	sr	sx	theta	lambda	K
AppNL-G-F	6	1.10204	1.89635	0.0397	2	0.00666667	0.7575	0.296277	0.0155	0.0159091	35.4697
AppNL-G-F	6	1.14706	1.97969	0.7525	2	0.005	0.7575	2.2525	0.005	0.01982	4.85
AppNL-G-F	6	2.51429	1.2438	0.186786	1.42857	0.00604167	2.56396	2.03893	0.00617857	0.01946	22.35
AppNL-G-F	6	1.02	0.795526	0.948438	4.91667	0.00814815	0.650714	0.352604	0.0182	0.0159091	1.35714
AppNL-G-F	6	1.1875	0.614107	0.113125	1.33333	0.005	2.50167	1.13125	0.013	0.0166842	34.6184
AppNL-G-F	6	1.02222	1.005	0.976429	4.18182	0.004	0.508333	0.278333	0.012125	0.0197188	4.82812
AppNL-G-F	6	1.10638	0.75625	0.505	2	-0.00875	2.53281	0.278333	0.00842857	0.0155	1.35
Control	6	2.21429	1.9801	0.1882	4	-0.001	1.505	2.58472	0.0034	0.0191	24.4756
Control	6	1.21212	1.8209	0.0230263	4.14286	-4.34e-19	0.0779545	0.403421	0.011	0.0187143	34.95
AppNL-G-F	6	1.04	1.19452	0.0397	2	0.00571429	2.75083	0.138143	0.00376087	0.0187143	35.65
AppNL-G-F	6	2.65385	1.9403	0.0199	1.83333	0.0086	2.50167	2.85984	0.00542	0.01982	21.65
Control	6	2.9	1.93367	0.0397	1.73684	0.0098	2.76395	2.5814	0.0074	0.0175455	13.8676
Control	6	2.72727	0.839167	0.13375	3.75	0.00461538	2.62625	2.92525	0.0023	0.0185789	20.6875
Control	6	2.82759	1.8607	0.2125	1.5	0.00979592	1.93214	1.735	0.00485366	0.0155	10.5109
AppNL-G-F	6	2.5	1.97969	0.160652	4.92308	0.00964286	2.701	1.505	0.0125	0.01946	5.55
AppNL-G-F	6	2.5	0.1095	0.0595	1.06452	0.00666667	1.0565	2.50167	0.01802	0.0150645	18.5
Control	6	2.95	1.9403	0.1189	4	0.0094	1.505	0.4286	0.00218	0.0198163	4.85
Control	6	2.96	1.9801	0.0595	4.90476	0.0098	0.907	2.2525	0.00723256	0.00842857	5.55
Control	6	2.04545	0.3085	0.60602	4.22449	-0.0098	0.442763	2.103	0.011	0.0179545	11.15
Control	6	2.86364	1.89847	0.0199	1.82353	0.00526316	2.2525	1.62958	0.0038	0.0188261	35.3269
Control	6	2.86957	1.85786	0.0199	2.5	0.0098	2.2525	2.43938	0.00580769	0.019775	35.65
Control	6	1.25	1.005	0.938125	4.71429	0.00875	0.508333	0.212027	0.0095	0.0161923	34.8587
Control	6	1.33333	1.93908	0.0199	1.5	0.0054	2.50167	1.505	0.00254	0.01982	35.65
Control	6	2.5	0.5075	0.988488	4.94286	0	1.03781	0.0399	0.00218	0.01982	27.25
Control	6	1.02041	0.6269	0.7525	3	-0.00875	0.850938	0.585	0.0055	0.0186	31.8152
Control	6	1.5	0.933929	0.945	3	0.00583333	1.505	0.1595	0.0065	0.019325	33.8125
AppNL-G-F	6	1.1	1.005	0.835	4.6	0.00888889	1.505	0.2193	0.0128947	0.017	34.4091
