# Supplementary material for: Misclassification in memory modification in AppNL-G-F knock-in mouse model of Alzheimer’s disease
Source: eLife. 2025 Nov 4;14:RP105347. doi: 10.7554/eLife.105347 (PMC12585179; doi:10.7554/eLife.105347)
Supplement: Figure 5—source data 2. [file elife-105347-fig5-data2.xlsx]

## Sheet: Figure 5C-5H
		Latent causes acquired during acquisition phase				Latent causes acquired during extinction phase				Latent causes acquired after extinction phase
		Figure 5C		Figure 5F		Figure 5D		Figure 5E		Figure 5G		Figure 5H
Genotype	Age	K	P	Wcs	Wcontext	K	P	Wcs	Wcontext	K	P	Wcs	Wcontext
AppNL-G-F	6	2	0.00119775	0.160697	0.0428134	3	0.0362683	0.0119838	0.0186114	2	0.962534	0.0130272	0.0288967
AppNL-G-F	6	2	0.015423	0.944946	0.204423	3	0.984577	-0.0201922	0.2995	0	0	NaN	NaN
AppNL-G-F	6	3	0.0305375	0.691707	0.155302	20	0.969463	0.0840949	0.185542	0	0	NaN	NaN
AppNL-G-F	6	2	1	-0.0935629	0.906054	0	0	NaN	NaN	0	0	NaN	NaN
AppNL-G-F	6	2	0.0508667	0.311247	0.0728667	2	0.949133	0.00166158	0.0508544	0	0	NaN	NaN
AppNL-G-F	6	2	0.0355554	0.0472381	0.0388516	2	0.676732	-0.0357676	0.909078	1	0.287713	0.00265153	0.00373031
AppNL-G-F	6	2	1	0.0267282	0.192452	0	0	NaN	NaN	0	0	NaN	NaN
Control	6	3	0.0148318	0.970414	0.194121	22	0.985168	-0.0177843	0.126208	0	0	NaN	NaN
Control	6	2	0.00113754	0.149628	0.0299407	3	0.0354089	-2.55e-08	0.000420175	2	0.963454	-4.57e-07	0.02255
AppNL-G-F	6	2	0.0295673	0.151728	0.039605	2	0.633238	0.00615179	0.0261075	1	0.337195	0.00562249	0.00569593
AppNL-G-F	6	3	0.0158965	0.103961	0.0415667	19	0.984104	0.156412	0.169813	0	0	NaN	NaN
Control	6	3	0.0150186	0.183947	0.0605763	11	0.984981	0.094733	0.120763	0	0	NaN	NaN
Control	6	3	0.043389	0.691472	0.15431	18	0.956611	0.0587912	0.179869	0	0	NaN	NaN
Control	6	3	0.0147223	0.799693	0.184988	8	0.985278	0.0419723	0.154113	0	0	NaN	NaN
AppNL-G-F	6	3	0.0122624	0.974247	0.220562	3	0.987738	0.0032816	0.179702	0	0	NaN	NaN
AppNL-G-F	6	3	0.0692621	0.221376	0.0621571	16	0.930738	0.0934128	0.125891	0	0	NaN	NaN
Control	6	3	0.0108417	0.668758	0.158475	2	0.989158	0.00141702	0.107492	0	0	NaN	NaN
Control	6	3	0.0132643	0.416045	0.107673	3	0.986736	0.0139473	0.0845048	0	0	NaN	NaN
Control	6	2	0.788127	-0.0108083	0.423531	10	0.211873	-0.0206565	0.0674465	0	0	NaN	NaN
Control	6	3	9.56e-05	0.094299	0.0314923	31	0.00328523	0.158791	0.162331	2	0.996619	0.010401	0.0184027
Control	6	3	0.000104917	0.126621	0.0488457	31	0.00350508	0.294763	0.302069	2	0.99639	0.0193668	0.0313825
Control	6	2	0.0359094	0.0503115	0.041473	2	0.683336	-0.024125	0.881883	1	0.280754	0.00598448	0.0081969
Control	6	2	0.000283798	0.0872337	0.0260891	3	0.00820287	0.0124259	0.0155339	2	0.991513	0.0106721	0.0186316
Control	6	2	0.983016	0.0596518	0.92313	0	0	NaN	NaN	1	0.0169841	0	0
Control	6	2	1	-0.0356656	0.422558	0	0	NaN	NaN	0	0	NaN	NaN
Control	6	2	0.0412729	0.0756419	0.0352933	2	0.748904	-0.0120205	0.546832	1	0.209823	0.00444535	0.00555574
AppNL-G-F	6	2	0.0369157	0.0486445	0.0424216	2	0.701934	-0.023037	0.79038	1	0.26115	0.00656291	0.00842369

## Sheet: Figure 5—figure supplement 3
		Latent causes acquired during acquisition phase
Genotype	Age	Simulated CR	P	Wcs	Wcontext
AppNL-G-F	6	0.875074	1	0.160937	0.0428541
AppNL-G-F	6	1	1	0.957591	0.199518
AppNL-G-F	6	0.664352	0.0299287	0.704011	0.155302
AppNL-G-F	6	1	1	0.0503849	0.023114
AppNL-G-F	6	1	1	0.370162	0.0820324
AppNL-G-F	6	1	1	0.127401	0.0318803
AppNL-G-F	6	1	1	0.564361	0.0988722
Control	6	0.42887	0.00331003	0.974373	0.192475
Control	6	0.733718	1	0.149782	0.0299565
AppNL-G-F	6	0.999896	1	0.155128	0.0401684
AppNL-G-F	6	0.599313	0.00318425	0.104011	0.0414422
Control	6	0.601702	0.00303221	0.184114	0.0603428
Control	6	0.906364	0.0840163	0.722077	0.155492
Control	6	0.698298	0.00422052	0.80375	0.18426
AppNL-G-F	6	0.505158	0.00345845	0.978546	0.218852
AppNL-G-F	6	0.975732	0.497819	0.244875	0.064975
Control	6	0.70336	0.00654864	0.670588	0.156678
Control	6	0.719154	0.00262106	0.416779	0.106876
Control	6	1	1	0.308416	0.0460031
Control	6	0.555351	0.00386085	0.094307	0.031493
Control	6	0.620857	0.00391661	0.126634	0.0488467
Control	6	1	1	0.133167	0.0406334
Control	6	0.940926	1	0.0872633	0.0260927
Control	6	1	1	0.109805	0.021961
Control	6	1	1	0.31507	0.049014
Control	6	1	1	0.196197	0.0485726
AppNL-G-F	6	1	1	0.111335	0.0364893
