# Supplementary material for: Misclassification in memory modification in AppNL-G-F knock-in mouse model of Alzheimer’s disease
Source: eLife. 2025 Nov 4;14:RP105347. doi: 10.7554/eLife.105347 (PMC12585179; doi:10.7554/eLife.105347)
Supplement: Figure 6—source data 1. [file elife-105347-fig6-data1.xlsx]

## Sheet: Figure 6—figure supplement 1AB
		Number of errors (daily mean)												Latency (daily mean)												Travel Distance (daily mean)
		Figure 6—figure supplement 1A						Figure 6—figure supplement 1B						Figure 6—figure supplement 1A						Figure 6—figure supplement 1B						Figure 6—figure supplement 1A						Figure 6—figure supplement 1B
Genotype	Age	1	2	3	4	5	6	9	10	11	12	13	14	1	2	3	4	5	6	9	10	11	12	13	14	1	2	3	4	5	6	9	10	11	12	13	14
AppNL-G-F	12	10.3333	10	4.66667	6	6	4.66667	10.3333	7	7.66667	3.33333	4.33333	6.66667	83.2667	60.5833	18.3667	33.7667	30.65	22.7333	35.0333	24.3833	27.1833	12.2667	13.7333	17.1833	612.404	490.675	169.352	281.032	241.139	201.331	364.398	235.567	289.659	149.858	195.912	250.634
AppNL-G-F	12	2.33333	6.66667	9	1.66667	4.66667	4	7.66667	2.66667	6.33333	6.66667	2.33333	2	34.3667	36.7333	39.5667	11	19.1667	15.9333	25.0333	12.3167	15.8833	16.1667	10.2167	8.93333	236.986	289.582	359.295	121.544	161.542	183.137	296.84	121.419	210.659	215.064	138.596	110.752
AppNL-G-F	12	4.66667	6.66667	8.33333	2	2.66667	3	5.33333	9	7.33333	1	1.33333	4	51.5	54.1333	45.6167	15.4167	15.3333	16.1833	23.8667	38.3	27.1167	5.76667	7.6	12.35	340.741	358.367	352.667	119.761	108.733	142.489	191.035	305.215	265.806	59.1297	77.4895	138.505
AppNL-G-F	12	7	8.33333	3.66667	7.33333	3.66667	7.33333	4.33333	6	4.66667	9	5	2	74.1667	48.5667	23.4167	30.6833	13.3667	23.5833	11.45	20.2833	19.4833	27.75	14.05	6.63333	411.449	331.016	150.832	258.749	131.457	283.715	178.861	268.481	199.483	288.745	192.848	106.138
AppNL-G-F	12	15.6667	5.66667	5.33333	5.33333	5.33333	11.3333	22.3333	5	6.33333	0	0.666667	0	188.6	44.1333	28.7667	22.4	29.8667	48.1	96.35	20.4	21.4833	3.45	6.23333	3.08333	1134.67	284.873	267.41	192.822	237.153	469.715	785.97	218.674	214.698	44.2644	79.2603	44.416
AppNL-G-F	12	1.66667	4	7	3.33333	5	2.66667	9.33333	4	4.33333	7.33333	2	6	41.85	38.05	49.8	19.35	27.3333	13.3167	33.6	18.3667	13.3167	29.3167	12.05	29.1333	207.647	217.26	307.932	146.024	204.162	130.726	329.81	151.207	133.714	259.629	96.6028	221.653
AppNL-G-F	12	9	4.33333	6.33333	4	2.33333	9	3.33333	5.33333	3	5.66667	9.33333	4.33333	107.533	62.7667	47.4833	24.1833	12.95	35.6333	12.4	15.7167	8.45	17.7667	28.7	14.5167	422.194	203.616	241.969	174.871	139.283	330.157	140.54	167.6	112.428	203.008	320.602	216.974
Control	12	5.66667	6.33333	5.33333	9.66667	7.66667	5.66667	7.33333	9.66667	6.33333	4.33333	2.33333	0	125.817	49.3	45.6667	76.3	58.35	104.583	76.6667	52.2833	38.2167	22.85	14.2167	22.9167	382.608	298.501	246.315	471.308	348.512	319.344	320.683	346.873	271.425	202.665	98.5557	56.6982
Control	12	5.66667	1.66667	2	4	2	3	7	7	5	5	6.66667	5	79.3833	26.1	21.35	28.25	13.6667	24.2333	38.3667	34.9333	30.4167	27.6333	25.9	21.1167	391.112	118.737	142.22	158.008	89.2606	160.294	240.784	264.348	193.24	187.413	210.079	175.05
Control	12	6.33333	7.66667	3.66667	3.33333	3	8	14.3333	4	4.66667	5.33333	4.66667	2	98.9833	85.3167	23.7833	35.9167	19.6167	45.2667	80.7833	20.8833	22.0167	24.1167	22.8	16	470.278	382.94	172.353	243.051	153.648	301.823	492.631	149.562	159.831	185.179	198.943	138.173
Control	12	3.33333	1.33333	1.66667	1.66667	2.33333	0.333333	7.66667	4.66667	0.666667	1.33333	2.33333	0	46.9833	18.3	16.9667	17.0333	17.7333	6.83333	59.0833	20.3333	11.9167	7.75	11.25	3.76667	218.795	93.7929	110.421	111.552	153.173	60.8191	349.361	164.194	96.1057	91.8576	94.0001	41.4778
Control	12	8.66667	6	5	5	5	3.66667	6	6	7.33333	2.33333	10	3.66667	107.933	55.85	37.45	30.6167	23.55	20.2833	30.8333	28.6167	24.75	12.7	30.4	18.4833	535.87	320.361	228.46	199.5	187.865	145.296	197.885	201.637	215.294	100.747	294.05	136.517
Control	12	5	6	11	6	7.33333	3.66667	15	2	3	4	1.66667	1.33333	87.95	24.7	52.9667	25.7	29.65	18.1	61.3333	9.45	12.1667	20.1667	10.3167	13.5	513.335	197.929	473.022	242.53	276.796	142.848	612.442	91.0915	116.155	233.804	97.1724	92.7775
Control	12	3.33333	1.33333	0.666667	6	16	11.6667	15.6667	10.6667	8.66667	3.66667	5.33333	7.33333	58.0167	18.55	12.7667	34.5167	168.3	125.95	86.1833	66.4667	57.4	27.8833	27.55	67.05	295.342	89.6124	53.6612	246.617	1010.98	604.88	700.306	464.177	517.805	225.547	264.429	376.736
Control	12	5.33333	4	5.33333	2.66667	2.66667	3.66667	3.66667	4.33333	4	3.66667	5.33333	3.66667	54.9333	27.1333	41.9333	27.7167	31.5167	23.45	31.1667	26.1333	32.1667	27.7833	43.0833	40.2333	334.692	180.597	247.166	195.689	169.18	166.592	233.378	198.818	224.349	186.306	325.703	274.745
AppNL-G-F	12	8.33333	7.66667	2.66667	1.33333	4	2.33333	12.3333	4	4.33333	2	3.66667	2.66667	118.633	46.4167	16.8	14.8167	14.2167	10.6333	46.5	21.5833	14.7667	9.4	15.7667	7.5	685.245	337.933	136.016	118.741	178.758	154.896	549.868	200.599	211.641	178.123	250.515	158.556
AppNL-G-F	12	5	4	5	4.66667	10.3333	4.33333	3.33333	3	3	3.66667	4	0.333333	71.5	35.3833	24.0167	21.4167	32.9	18.0333	15.5333	14.1	9.96667	10.3667	8.4	5.83333	354.067	207.384	215.724	213.435	366.746	199.756	143.842	171.9	162.549	184.215	156.615	137.659
AppNL-G-F	12	10.3333	8.66667	4.66667	6.33333	9	5.66667	5	7	3	3	7	6	85.75	61.85	21.5333	25.2667	34.9333	22.6667	18.0333	24.5	11.1667	10.1833	21.2167	14.85	522.571	422.332	187.441	225.626	320.14	212.164	162.08	246.251	118.172	117.445	227.789	187.435
AppNL-G-F	12	3.33333	8	5.33333	4.33333	2.66667	4.33333	7.33333	5	5	6.33333	3	0	49.4	63.2	38.95	26.6	10.0833	20.1	30.85	20.5	23.85	21.75	10.95	8.88333	233.017	388.607	287.021	190.284	100.174	205.736	293.024	227.147	248.712	264.899	154.768	56.8775
Control	12	5.33333	8	6.66667	4.33333	3	5.66667	9.33333	5.33333	3.66667	6.33333	4.66667	5	90.2167	95.45	58.75	45.5	84.8167	46.9833	65.7667	120.083	37.5333	69.3667	43.2	47.45	254.56	367.614	259.04	190.775	116.704	211.991	322.217	214.548	169.344	205.631	160.863	165.136
Control	12	7.33333	5.66667	11.6667	7.66667	6.33333	7.33333	7.33333	6.66667	5.66667	4.33333	6.66667	2.66667	86.35	41.0833	51.4	54.6333	41.0667	36.1167	37.15	48.4167	32.45	39.0667	36.25	16.6	460.896	244.674	464.035	356.766	273.962	297.462	378.82	336.968	247.636	235.889	309.296	172.682
AppNL-G-F	12	2	7.33333	2	0.666667	3.66667	4.33333	6	1.66667	2	3	1	0.333333	63	61.9667	10.2	5.76667	12.2833	13.75	15.4833	6.16667	6.81667	10.1	5.73333	6.05	160.521	315.364	153.101	64.5039	149.648	210.744	268.992	103.795	142.628	179.721	137.062	173.765
AppNL-G-F	12	6.66667	9.33333	7.33333	5.66667	3	1.33333	12.3333	5.33333	3.66667	12.6667	3.66667	2.33333	53	47.4667	47.5833	26.0833	19.35	9.35	49.85	20.65	12.2667	35.25	12.9667	11.4333	304.766	330.623	316.969	215.57	145.385	87.0443	450.467	181.466	143.629	398.317	192.589	174.621
Control	12	3.33333	0.333333	5.33333	6	3.33333	3.66667	8	4.33333	6.33333	4.33333	1	0.333333	40.0167	15.5833	54.65	49.75	38.4333	44.8	68.55	44.3667	49.8167	43.2833	36.3667	33.8167	196.708	71.2496	293.691	268.658	130.56	182.218	343.582	189.091	249.417	208.722	148.67	94.3559
Control	12	8	3.66667	7.33333	8.66667	7.66667	6.66667	12	12.3333	10.3333	7.33333	7.33333	7.33333	118.633	41.9	73.8833	146.333	158.683	138.583	134.433	152.867	198.5	169.167	147.283	110.4	622.948	200.005	386.629	448.073	527.261	451.903	733.843	720.627	692.172	531.927	560.986	479.028
Control	12	10.6667	2	5	6.66667	0.666667	6	4.66667	2.66667	5	2.66667	6	2	170.933	90.5333	54	57.4167	18.0833	44.2	52.4167	31.2333	71.1333	25.25	48.7	27.3833	1029.86	326.778	309.943	453.711	84.3115	370.522	389.566	182.408	420.906	167.905	480.233	189.15
Control	12	4.66667	1.33333	0.666667	1	1.33333	2	9.33333	4.33333	1.66667	3.33333	0	4.33333	72.2833	18.7833	12.95	14.5167	22.4167	30.9833	62.2333	27.65	30.8	34.1167	26.95	43.1833	419.873	104.778	80.3588	78.6411	119.438	159.252	338.158	173.271	172.574	194.155	85.9688	257.667
Control	12	7.66667	7	0.666667	2	1.66667	1.66667	6.66667	5	1.66667	2.66667	3	2	93.15	96	8.88333	16.25	15.4333	17.1	43.1	28.4167	14.4333	20.8833	22.0167	34.4167	410.588	291.202	54.861	91.2417	84.2939	89.3205	236.94	176.785	99.6376	106.148	97.4332	108.024
Control	12	7.33333	2	2.33333	1.66667	0.666667	1.66667	5	3.66667	2	4	3.66667	0.333333	121.117	20.1333	21.8667	15.3	13.6167	14.6667	37.2833	20.0167	10.6167	25.65	20.4833	6.11667	469.047	122.776	155.451	103.812	98.7018	104.106	244.167	164.576	120.572	207.7	221.281	43.5604
Control	12	4.66667	8	9.66667	6	6	5.33333	10.3333	6	6	4	6.33333	5	89.2167	88.9	105.733	82.05	112.15	111.917	107.733	58.75	50.0167	32.2667	80.2	73.5167	344.365	503.28	494.98	285.348	456.246	292.695	612.006	298.699	242.226	176.842	304.704	320.21
Control	12	2.33333	1.33333	3	1	3	0.666667	4.33333	4.66667	4	5.66667	2.33333	5.66667	34.6333	23.3333	24.9667	11.65	20.0167	12.5333	34.9	34.9167	18.4667	36.6667	17.2	25.85	141.808	125.428	131.962	62.0235	134.429	84.0017	216.137	260.907	149.68	233.767	114.727	187.272
AppNL-G-F	12	5	7.66667	3.66667	2	0.666667	2	12	3	2.33333	3.33333	5	3.33333	64.5333	59.5	23.4	22.9	13.75	12.2833	43.05	20.15	18.5333	12.6167	17.9833	15.0333	364.571	344.6	155.548	165.535	92.4915	101.756	394.765	141.449	122.714	135.208	200.526	174.6
AppNL-G-F	12	3.66667	4.66667	0.666667	5.33333	2.66667	5.66667	4.66667	12.3333	5.66667	4.33333	4.66667	5.33333	42	33.7667	8.71667	20.8333	10.2	25.7333	13.4333	34.2667	15.1667	14.9333	15.5667	17.95	285.252	263.976	79.1766	220.043	136.975	314.271	177.635	554.175	248.076	225.285	245.871	288.427
AppNL-G-F	12	6.33333	7.66667	4	3	5	4	5.33333	6	5.33333	5	3.33333	0.666667	76.6	42.7833	21.5667	18.15	14.55	14.7333	20.8667	20.1167	14.6333	12.25	10.5667	4.73333	361.374	269.024	144.66	151.582	291.539	162.833	226.09	219.939	205.879	206.382	137.554	55.2009
AppNL-G-F	12	4.66667	2.66667	4.33333	4.33333	2	0.666667	6.33333	8.66667	11	6.33333	0	0.333333	77.8333	44.0667	55.5667	37.1667	16.2833	15.7	38.4667	47.1667	48.0667	29.45	5.31667	7.83333	362.448	186.833	254.918	201.699	113.997	88.3791	278.465	327.157	380.075	240.478	41.9193	57.4294
AppNL-G-F	12	5.33333	3.66667	6	3.33333	7	5.66667	4	6.33333	8.33333	4.33333	3.33333	3.33333	57.5333	41.6333	29.6	19	33.1833	28.6333	15.6167	16.9	22.6833	18.9833	9.38333	9.11667	270.512	201.555	201.524	152.121	249.614	211.765	142.46	190.713	297.657	168.406	117.644	108.013

## Sheet: Figure 6B
		Strategy use count (daily sum)
		1					2					3					4					5					6					9					10					11					12
Genotype	Age	Random	Perimeter	Serial	Spatial	Confirmatory	Random	Perimeter	Serial	Spatial	Confirmatory	Random	Perimeter	Serial	Spatial	Confirmatory	Random	Perimeter	Serial	Spatial	Confirmatory	Random	Perimeter	Serial	Spatial	Confirmatory	Random	Perimeter	Serial	Spatial	Confirmatory	Random	Perimeter	Serial	Spatial	Confirmatory	Random	Perimeter	Serial	Spatial	Confirmatory	Random	Perimeter	Serial	Spatial	Confirmatory	Random	Perimeter	Serial
AppNL-G-F	12	3	0	0	0	0	2	1	0	0	0	1	0	0	1	1	0	2	0	1	0	0	2	1	0	0	1	2	0	0	0	0	2	0	1	0	0	1	1	0	1	2	1	0	0	0	1	1	1
AppNL-G-F	12	1	0	1	0	1	0	2	0	1	0	0	2	1	0	0	2	0	0	1	0	0	2	0	1	0	3	0	0	0	0	0	3	0	0	0	1	0	2	0	0	1	2	0	0	0	0	2	0
AppNL-G-F	12	1	1	1	0	0	2	1	0	0	0	1	1	0	1	0	0	1	1	1	0	1	1	0	1	0	2	0	0	1	0	0	3	0	0	0	0	2	1	0	0	0	3	0	0	0	0	0	0
AppNL-G-F	12	0	3	0	0	0	1	1	0	1	0	2	0	0	1	0	1	1	0	0	1	0	1	2	0	0	2	1	0	0	0	2	1	0	0	0	0	2	1	0	0	0	1	0	2	0	0	2	1
AppNL-G-F	12	0	3	0	0	0	1	1	0	1	0	1	1	0	0	1	0	1	1	0	1	1	2	0	0	0	2	1	0	0	0	0	2	0	0	1	0	2	0	1	0	1	1	0	1	0	0	0	0
AppNL-G-F	12	0	0	1	1	1	0	1	0	2	0	1	1	0	1	0	0	1	1	1	0	1	1	0	0	1	1	1	1	0	0	0	3	0	0	0	0	1	0	1	1	0	2	1	0	0	0	2	1
AppNL-G-F	12	0	3	0	0	0	0	0	0	2	1	1	2	0	0	0	1	1	1	0	0	1	0	2	0	0	2	1	0	0	0	1	1	0	1	0	1	1	1	0	0	0	1	0	2	0	0	2	0
Control	12	0	1	2	0	0	0	1	2	0	0	0	2	0	1	0	1	1	0	0	1	0	2	1	0	0	0	1	0	1	1	0	1	0	0	2	0	3	0	0	0	0	1	0	0	2	0	1	0
Control	12	3	0	0	0	0	1	0	1	1	0	2	0	1	0	0	1	0	1	1	0	1	0	2	0	0	1	0	2	0	0	0	2	0	0	1	2	0	1	0	0	1	0	1	0	1	0	2	0
Control	12	1	2	0	0	0	0	2	1	0	0	1	0	2	0	0	2	1	0	0	0	0	1	1	0	1	0	2	0	0	1	3	0	0	0	0	0	1	1	0	1	1	0	1	0	1	2	0	0
Control	12	0	0	3	0	0	0	0	2	1	0	1	0	1	1	0	0	0	1	1	1	2	0	0	0	1	0	0	1	2	0	1	1	0	0	1	0	2	0	0	1	1	0	1	0	1	0	0	0
Control	12	2	1	0	0	0	2	0	0	1	0	1	2	0	0	0	1	1	1	0	0	0	1	2	0	0	0	2	1	0	0	1	2	0	0	0	0	3	0	0	0	0	2	0	0	1	0	1	1
Control	12	2	0	0	0	1	1	1	0	1	0	2	0	1	0	0	2	0	0	1	0	1	0	0	2	0	1	1	0	1	0	2	0	1	0	0	1	0	2	0	0	0	1	1	1	0	1	0	0
Control	12	2	0	1	0	0	0	0	3	0	0	0	0	1	2	0	1	0	1	1	0	2	0	1	0	0	2	0	0	0	1	3	0	0	0	0	0	1	0	0	2	1	0	1	0	1	0	0	1
Control	12	2	0	1	0	0	1	1	1	0	0	2	0	0	1	0	2	0	1	0	0	1	0	2	0	0	0	0	1	1	1	2	0	0	0	1	2	0	0	0	1	2	0	0	1	0	1	0	0
AppNL-G-F	12	0	2	0	0	1	0	0	1	2	0	1	1	1	0	0	0	2	0	1	0	0	0	0	3	0	1	0	1	1	0	2	1	0	0	0	0	2	1	0	0	1	2	0	0	0	0	2	0
AppNL-G-F	12	0	1	0	1	1	1	1	0	0	1	0	1	1	1	0	2	0	0	1	0	2	0	0	1	0	0	0	1	1	1	2	0	0	1	0	1	1	1	0	0	0	1	1	0	1	0	3	0
AppNL-G-F	12	1	0	0	1	1	1	0	1	0	1	0	1	0	0	2	0	0	0	0	3	0	0	0	0	3	0	0	1	1	1	0	2	0	1	0	1	2	0	0	0	1	1	0	1	0	0	1	2
AppNL-G-F	12	1	0	0	1	1	0	0	0	2	1	0	0	0	2	1	1	0	0	0	2	0	0	0	2	1	1	0	0	1	1	0	1	0	1	1	0	2	0	1	0	1	1	0	0	1	0	2	0
Control	12	0	2	0	1	0	2	0	0	1	0	0	1	0	2	0	1	1	1	0	0	0	1	1	1	0	0	1	1	1	0	1	1	0	1	0	1	0	0	1	1	1	0	1	1	0	0	0	0
Control	12	1	2	0	0	0	1	1	0	0	1	3	0	0	0	0	2	1	0	0	0	0	1	1	0	1	2	1	0	0	0	1	0	0	0	2	1	1	0	0	1	1	2	0	0	0	0	0	2
AppNL-G-F	12	0	1	2	0	0	0	2	1	0	0	0	0	2	0	1	0	0	1	2	0	0	2	1	0	0	0	2	1	0	0	2	1	0	0	0	0	2	1	0	0	2	0	1	0	0	1	2	0
AppNL-G-F	12	0	1	0	1	1	0	3	0	0	0	0	3	0	0	0	1	2	0	0	0	1	1	1	0	0	0	2	1	0	0	1	2	0	0	0	0	2	0	1	0	2	0	0	0	1	2	1	0
Control	12	1	0	0	1	1	0	0	1	2	0	2	0	0	0	1	0	2	1	0	0	0	1	0	2	0	1	1	0	1	0	0	1	0	0	2	1	0	0	0	2	2	1	0	0	0	2	0	0
Control	12	2	0	0	0	1	0	1	1	1	0	2	1	0	0	0	0	0	0	0	3	1	0	0	0	2	1	0	0	0	2	0	0	0	0	3	0	0	0	0	3	0	0	0	0	3	0	0	0
Control	12	3	0	0	0	0	0	0	2	0	1	0	0	1	0	2	2	0	1	0	0	1	0	0	2	0	2	0	0	1	0	0	1	0	0	2	0	1	1	0	1	1	0	0	1	1	1	0	0
Control	12	1	0	1	1	0	2	0	0	1	0	0	0	2	1	0	0	0	0	3	0	0	0	1	2	0	1	0	1	1	0	2	0	0	0	1	0	1	0	0	2	1	0	2	0	0	2	0	0
Control	12	0	1	0	1	1	0	2	1	0	0	0	0	2	1	0	0	0	1	2	0	0	0	3	0	0	0	0	2	1	0	1	2	0	0	0	0	2	0	0	1	0	0	1	1	1	0	0	1
Control	12	2	1	0	0	0	1	0	2	0	0	1	0	1	1	0	1	0	2	0	0	1	0	1	1	0	1	0	2	0	0	1	1	0	0	1	2	0	0	0	1	2	1	0	0	0	2	0	1
Control	12	1	1	0	1	0	1	1	1	0	0	0	0	0	0	3	0	0	2	0	1	0	2	0	0	1	2	0	1	0	0	1	0	1	0	1	0	1	0	0	2	0	0	1	0	2	0	0	1
Control	12	0	1	0	1	1	1	0	2	0	0	1	1	0	1	0	0	0	1	2	0	1	1	0	1	0	0	0	2	1	0	0	1	0	0	2	1	0	2	0	0	0	0	2	0	1	0	0	0
AppNL-G-F	12	2	0	0	1	0	1	2	0	0	0	1	1	0	1	0	2	0	1	0	0	0	0	1	2	0	0	0	2	1	0	0	3	0	0	0	0	2	0	1	0	1	0	0	2	0	0	1	0
AppNL-G-F	12	1	0	0	1	1	1	0	2	0	0	0	0	1	2	0	0	2	0	1	0	1	1	0	1	0	1	1	0	1	0	0	1	2	0	0	2	1	0	0	0	0	2	0	0	1	2	0	1
AppNL-G-F	12	1	2	0	0	0	0	2	0	1	0	1	0	1	1	0	0	1	1	1	0	2	0	0	1	0	2	0	0	1	0	0	2	1	0	0	0	3	0	0	0	0	3	0	0	0	1	2	0
AppNL-G-F	12	1	1	0	1	0	3	0	0	0	0	1	1	0	1	0	0	2	1	0	0	2	0	1	0	0	1	0	1	1	0	0	1	2	0	0	0	2	1	0	0	0	3	0	0	0	0	2	0
AppNL-G-F	12	3	0	0	0	0	2	0	0	0	1	1	0	2	0	0	1	1	0	1	0	0	2	0	0	1	0	2	0	1	0	0	1	1	1	0	1	2	0	0	0	1	2	0	0	0	1	0	1
[truncated: 12 more columns]

## Sheet: Figure 6CD
		Time spent around hole
		Figure 6C (Probe test 1)												Figure 6D (Probe test 2)
Genotype	Age	-150	-120	-90	-60	-30	0	30	60	90	120	150	180	-150	-120	-90	-60	-30	0	30	60	90	120	150	180
AppNL-G-F	12	6.25	7.3	7.15	7.85	10.25	9.2	9.3	9.6	8.1	6.4	6.75	5.85	8.1	8.55	6.35	3.35	4.85	6.9	11.15	9.55	6.95	15.8	7.6	4.45
AppNL-G-F	12	3.7	0	0	0	0	2.35	11.75	96.1	4.15	0	0	0	12.2	6.85	9.2	8.9	2.45	7.55	13.35	11.05	5.25	4.65	3.1	4.8
AppNL-G-F	12	7.95	3.2	0.7	1	2.5	19.95	16.9	6	9.7	4.15	0	4.7	5.95	7.85	7.5	11.15	10.7	10.5	7.8	3.8	9	9.55	7.95	8.1
AppNL-G-F	12	11.7	8.2	7.1	6.35	11	13.55	5.8	12.75	4.35	8.7	10.8	4.15	12.45	12.45	12.3	7.4	5.05	4.7	6.35	7.6	8.2	10.1	4.5	6.25
AppNL-G-F	12	17.9	12.45	11.9	2.8	6.15	8.6	19.05	9.2	11.9	3.7	4.1	4.1	10.35	13.45	17.3	6.7	5.8	12.95	9.75	7.25	2.9	3.3	3.6	4.15
AppNL-G-F	12	9.2	12	0.4	0	2.05	12.8	12.6	14.35	9.05	15.45	6.3	2.8	3.1	13.5	7.25	11.4	6.7	5.25	4.4	6.75	6.6	13.75	11.85	14.55
AppNL-G-F	12	6.75	9	9.6	9	8.2	5.8	4.75	6.8	5.4	8.2	6.15	1.95	10.05	5.55	4.7	7	6.45	7	5.3	7.3	11.45	8	6.25	6.8
Control	12	0	0.3	8.3	3	1.1	16.35	51.45	2.2	6.3	5.7	0	0	16.55	6.7	4.65	9	15.3	15.9	20.9	11.8	0	1	0	5.8
Control	12	14.15	0	2.65	2.45	3.65	21.75	19.5	18.9	3.1	9.1	2.75	4	7.95	8.85	11.3	9.4	4.6	15.05	12.7	13.5	5.7	2.6	8.1	6.05
Control	12	12.2	11.75	5.4	7.7	0	32.5	18	3.95	9.5	2.65	4	0	27.8	0.35	0.5	1.85	0	30.4	2.05	3.9	0	0	3.4	25.6
Control	12	13.35	1.65	0.1	4.45	2.6	50.6	6.7	1.85	4.1	7.25	4.5	0	6.1	14.45	5.1	3.95	6.9	38.15	1.6	0	2.6	1.1	4.7	17.65
Control	12	10.45	6.75	8.8	2.4	8.15	13.45	10	5.25	1.5	13.9	6.95	8.3	1.6	3.55	3.25	4.3	5.05	5.75	18.2	9.5	12.95	8.85	3.9	6.65
Control	12	8.35	4.7	12.75	1.9	1.2	15.3	26.5	16.1	3.35	0.95	0	1.7	3.4	4.2	5.15	8.75	6.45	10.9	28.5	3.45	0.95	2.3	0	4.8
Control	12	0.5	0	9.05	9.25	8.15	18.05	50.6	3.85	6.45	2.6	0	0	0	0.95	0	0.3	8.45	5.25	47.3	5.35	0	0	4.4	3.35
Control	12	5.3	4.9	2.6	0	1.45	48.25	15.85	2.05	4.6	4.1	6.3	8.25	1	5	5.3	3.55	5.35	41.1	4.45	16.65	2.05	0	4.5	8.75
AppNL-G-F	12	4.4	3.85	9.05	4.75	5.6	8.65	24	4.25	5.3	5.35	5.65	1.95	6.15	6.5	7.05	5.75	4.8	8.25	7.1	3.1	1.05	2.75	3.75	3.6
AppNL-G-F	12	10.05	8.5	6.65	8.25	3.6	14.05	12.85	4.6	5.8	4	6.7	10.6	19.75	9.15	4.25	8.3	6.45	9.15	2.45	3	5	3.95	9.9	14.85
AppNL-G-F	12	6.65	6.3	12.8	10.45	5.25	4.9	9.8	7.4	10.85	10.5	6.75	6.75	5.95	8.9	11.55	10.15	8.1	13	7.65	6.65	5.25	4.45	10.9	10.45
AppNL-G-F	12	5.6	3.25	3.7	1.35	4.2	20.75	5.2	7.35	11.6	3.25	9.1	3	8.7	4	6.7	5.35	7	13.35	6.25	8.55	12.4	11.8	7.3	8.3
Control	12	119.35	0	0	0	0	3.2	0	0	0	0	0	0	0	0	0	0	0	0	0	2.35	2.6	2.4	4.2	131.8
Control	12	11.65	9.65	6.8	0.65	3.5	23.7	8.2	10.15	3.65	7	4.4	9.2	15.2	8	10	4	16.6	27.35	3.4	2.35	3.3	3.2	2.6	9.35
AppNL-G-F	12	8.05	7.1	8.2	6.3	9.2	7.5	5.85	5.7	13.35	6.8	7.55	11.4	4.45	4.35	3.65	8.25	1.6	7	18.55	2.7	2.7	6.4	15.1	3.15
AppNL-G-F	12	12.1	3.5	0	0.95	1.45	12.3	12.65	8.8	7.65	2.1	1.4	1.75	4.7	5.15	3.05	6.45	6.5	7.15	13.1	15.15	10.15	7.25	5.2	7.75
Control	12	9.95	3.15	4.45	7.3	9.75	33.7	13.95	3.3	2.55	3.5	7	4.9	20.15	1.3	0.2	6.95	1.65	30.75	5.75	4.3	9.15	1.4	3.75	13.65
Control	12	0	0	0	0	0	2.8	90.15	0.9	0	0	1.3	0	2.6	7.35	7.4	0.7	8.65	5.5	23.25	4.4	2	0	2.15	5.4
Control	12	0	0	0	1.45	3.65	17.8	49	7.2	5.4	0	0	0	2.05	5.45	8.25	3.65	4.55	12.1	26	3.15	1.25	0	0	7
Control	12	8.45	4.3	4.05	0	0	44.1	28.8	7.7	5.25	4.2	2.1	1.7	7.45	9	0	0	5.7	21.75	1.65	5.9	5.8	4.45	5.05	12.65
Control	12	2.3	12.65	0.9	3.6	5.15	12.1	8.55	16.35	16.2	7.4	12.4	16.85	5.75	6	18.6	0.35	5.7	11.65	21.45	9.6	7.45	8	1.45	5.5
Control	12	11.15	0	5.3	3.3	4.9	37.3	14.3	4.9	4.5	4.8	0	4.45	5.05	4.6	7.65	8.45	10.7	32.75	7.6	1.35	2.55	1.05	10.65	15.15
Control	12	2.75	0	0	1.75	3	12	73.6	7.6	5.1	0	0	0	1.65	7.25	5.9	4.55	7.7	8.2	47	3.4	3.7	3	5.4	7.65
Control	12	13.25	2	4.3	6.8	14.7	17.35	16.05	15.05	3.95	1.65	5.35	3	11.05	9.95	4.35	3.2	1.2	17.7	12.05	15.25	12.35	5.85	4.8	7.25
AppNL-G-F	12	4.8	13.05	8.95	8.85	7.35	12.95	15.9	14	6.05	7.35	5.95	6.6	21.5	7.5	9.6	9.85	2.5	11.9	8.5	4.2	6.05	2.55	3.65	5.5
AppNL-G-F	12	7.05	5.2	7.5	8.6	2.6	7.3	9.5	10	9.4	11.4	7.55	7.25	17.8	12.45	4.6	4.95	4.2	16.1	5.15	5.35	5.45	13.25	8.05	7.7
AppNL-G-F	12	8.5	2.6	5.75	7.25	5.5	16.15	15.6	18.2	9.25	3.65	1.8	11.7	5.1	8.25	7.15	9.15	8.8	7.9	10.3	7.5	10.45	7.25	5.25	11.8
AppNL-G-F	12	0.5	6.5	4.2	2.85	8.4	12.8	13.4	7.55	8.4	13.75	5.9	6.05	8.55	6.7	3	6.25	6.15	18.6	6.25	6.55	10.9	5.25	6.8	11.2
AppNL-G-F	12	7.75	6.4	3.4	5.05	6.2	8.4	8	9.05	6.55	17.45	7.8	14.8	3.45	4.55	3.8	4.25	6.45	8.05	3.4	9.8	15.45	5.95	10.7	7.05

## Sheet: Figure 6E
		Discrimination index (DI) Probe 2 vs. Probe 1
		Figure 6I	Figure 6—figure supplement 3C
Genotype	Age	2nd target hole	1st target hole
AppNL-G-F	12	0.330424	0.327302
AppNL-G-F	12	1	0.958553
AppNL-G-F	12	0.755117	0.484988
AppNL-G-F	12	0.621081	0.274052
AppNL-G-F	12	0.527094	0.623797
AppNL-G-F	12	0.846575	0.303392
AppNL-G-F	12	0.745142	0.502956
Control	12	1	0.70536
Control	12	0.686111	0.5
Control	12	1	0.5
Control	12	1	0.5
Control	12	0.379618	0.246139
Control	12	0.724167	0.398469
Control	12	1	0.237311
Control	12	0.554589	0.5
AppNL-G-F	12	0.84303	0.735069
AppNL-G-F	12	0.499154	0.316609
AppNL-G-F	12	0.603855	0.723164
AppNL-G-F	12	0.81133	0.5
Control	12	1	0
AppNL-G-F	12	0.787134	0.32677
Control	12	0.753267	0.5
Control	12	1	0.561618
Control	12	0.93784	0.5
Control	12	0.204082	0.430632
Control	12	1	0.516925
Control	12	0.703165	0.5
AppNL-G-F	12	0.381295	0.40461
AppNL-G-F	12	0.404833	0.585492
AppNL-G-F	12	0.608696	0.430028
AppNL-G-F	12	0.577796	0.517891
AppNL-G-F	12	0.349811	0.519782
Control	12	0.468276	0.5
AppNL-G-F	12	0.165873	0.401806
Control	12	1	0.883942
Control	12	0.794976	0.5

## Sheet: Figure 6—figure supplement 3AB
		Number of errors (daily mean)												Latency (daily mean)												Travel Distance (daily mean)
		Figure 6—figure supplement 1A						Figure 6—figure supplement 1B						Figure 6—figure supplement 1A						Figure 6—figure supplement 1B						Figure 6—figure supplement 1A						Figure 6—figure supplement 1B
Genotype	Age	1	2	3	4	5	6	9	10	11	12	13	14	1	2	3	4	5	6	9	10	11	12	13	14	1	2	3	4	5	6	9	10	11	12	13	14
AppNL-G-F	6	7.33333	7	5	5	7.66667	4.33333	6	3	4.66667	4	2.66667	4	105.883	46.8167	32.7667	33.25	40.3833	23.3833	24.5833	12.3333	21.2667	12.7	13.8333	14.35	586.715	424.781	273.538	295.664	401.649	275.375	243.91	143.704	210.592	180.812	127.339	147.538
AppNL-G-F	6	6	4	7	6	4.33333	4	5.33333	4.33333	2.66667	4	7.33333	2	66.1667	25.6833	47.45	35.7167	19.9667	13.05	19.2167	14.95	11.9333	13.45	17.35	8.3	399.653	188.111	404.268	330.074	227.44	147.395	204.647	213.953	164.755	214.167	241.334	139.018
AppNL-G-F	6	5	4	6.66667	7.66667	2.33333	5.33333	7.33333	6.33333	4	7	5.33333	2.33333	126.133	42.8	73.5833	48.0333	16.5833	23.5333	32.3667	28.65	20.8833	18.9833	13.9333	12.2667	656.67	305.398	510.315	394.949	156.888	201.943	345.73	318.6	217.069	269.546	172.332	149.408
AppNL-G-F	6	9.33333	3.66667	7.33333	6.33333	4.33333	5.66667	4	4.33333	6.33333	5	5.66667	3	77.2833	25.9	31.1167	27.85	19.1	22.6833	14.4333	19.4	21.6833	18.15	16.4	12.4833	619.404	201.362	303.703	241.175	185.385	208.246	148.598	203.765	234.542	231.655	192.795	133.319
Control	6	6	1.66667	10	4.33333	4	2.33333	10	5.33333	5	3.33333	3.66667	6.33333	64.9833	19.45	261.9	44.4333	30.15	17.6167	51.95	30.2167	15.0667	14.65	18.3833	29.05	371.912	91.4773	635.661	224.899	220.035	138.648	579.354	329.618	161.611	150.696	231.856	355.033
Control	6	8.66667	4.33333	0.333333	6	4.66667	0.333333	3.66667	2.33333	1	5.33333	4.33333	4.66667	76.5	36.25	12.8167	36.6167	20.45	7	19.1	11.4667	20.2667	19.5667	25.2667	25.8	615.087	241.446	66.166	292.572	181.105	51.751	204.166	120.603	135.198	200.744	230.943	196.555
Control	6	9.33333	4.33333	9.66667	3.66667	7.66667	2	4.33333	8.33333	5	5.66667	7	2.66667	90.4	53.9	62.7667	30.5333	40.8333	13.1	16.5	24.8833	19.8333	13.15	22.75	9.73333	584.165	298.076	447.7	199.204	336.24	105.332	158.963	280.582	234.012	182.592	313.379	146.003
AppNL-G-F	6	8	3	0	3.33333	6.33333	6.66667	6	5.66667	5	0	0	3.33333	124.5	53.0167	7.96667	23.0667	37.8	39.05	35.7167	20.7333	19.75	5.35	6.2	17.3	437.524	200.444	38.2541	121.695	240.824	219.927	217.878	175.484	180.378	41.4506	37.1571	119.074
AppNL-G-F	6	13	4.66667	4	2.66667	3.33333	0.666667	9.33333	4	2.66667	1	4	0	135.283	34.2167	26.55	15.2833	14.9667	9.86667	51.9667	10.1	11.1	3.6	10.8167	3.76667	628.474	183.758	234.733	130.733	169.528	46.2696	416.592	145.066	126.205	63.2498	139.713	44.3339
AppNL-G-F	6	8	6	4.33333	4.33333	4.33333	2.33333	6.33333	5	8.66667	9	7.66667	4.33333	81.8333	42.2667	25.8167	18.7333	17.3167	14.9167	26.9	18.6833	32.9333	27.9333	20.3	16.5	440.61	231.979	173.884	145.594	132.886	115.15	210.797	145.628	298.885	280.759	239.93	231.494
AppNL-G-F	6	6.66667	6	4	3	3	5.33333	6.33333	4.66667	10.3333	3.33333	3.66667	3.33333	57.4167	38.75	20.5167	11.3167	10.7667	20.8833	22.8833	14.0333	39.0167	14.3333	10.7167	12.4167	370.668	274.47	166.176	133.779	116.572	245.713	219.539	161.24	308.468	136.28	126.694	129.131
Control	6	9.33333	6	9	4.66667	3.33333	5.66667	9.33333	8	5	6.33333	5.66667	2	84.7667	59.3833	57.9833	32.0667	29.0667	36	51.5667	48.4167	34.5167	26.05	40.6333	10.6	529.446	353.094	405.407	215.802	188.545	259.307	311.411	321.411	176.785	234.814	229.294	103.316
Control	6	6.66667	5.66667	2.66667	1.66667	0.666667	2.33333	5.66667	6	4.66667	5.66667	2.33333	3	100	52.65	14.3667	13.0167	5.18333	14.4667	25.0667	28.1167	18.6333	25.35	9.78333	9.9	572.265	275.076	104.939	142.293	70.5916	141.997	227.125	218.457	183.086	232.094	114.808	125.542
Control	6	8	4	4.66667	4	2.66667	4.66667	7.33333	2	14.6667	8.33333	6	5	100.6	62.1333	50.3167	30.6	18.2167	37.8667	40.4167	15.3833	52.55	29.4667	22.65	16.1167	577.774	290.555	320.059	212.461	112.928	222.805	364.173	111.956	579.358	390.383	245.821	174.889
Control	6	7.33333	5	1.33333	2.66667	0	0.666667	6.33333	5.66667	1.33333	3	4.66667	0.333333	114.983	35.7167	13.2333	16.4333	4.81667	8.61667	30.8667	19.0833	8.85	10.9167	17.9333	5.25	629.401	236.708	119.448	143.455	55.5384	75.4258	218.72	183.203	85.0124	125.233	153.268	62.1841
Control	6	7	2	2	6.33333	3.66667	4.66667	6	16	2.33333	6	7.66667	5.33333	182.55	22.2833	23.3	37.6167	27.2	27.7	40.4	126.85	15.2833	40.2167	42.5667	20.2167	403.291	116.317	129.115	254.115	187.721	211.24	270.667	794.082	119.887	332.674	309.331	183.517
Control	6	6	4.33333	5.66667	2	2.66667	2.33333	7.33333	4.33333	5	0.333333	1.66667	1	81.1833	55.1667	39.7833	11.5833	14.9667	18.8833	39	23.4167	23.1833	5.4	19.35	6.78333	451.293	318.09	299.165	115.86	131.813	115.513	315.371	170.396	197.804	51.8452	101.313	54.7744
Control	6	6.66667	0.666667	3.66667	2	5	8.66667	5.33333	5	2	2	6	2	84.8167	13	36.35	16.95	31.8833	45.1333	30.55	24.1167	16.6667	14.4167	30.9667	15.7833	479.731	69.3275	203.156	124.649	230.859	384.004	212.275	175.027	94.5947	108.345	221.446	95.1577
Control	6	8.33333	2.66667	3.66667	4	1	4.33333	13.3333	6	3.66667	9.33333	2.33333	1.33333	112.467	54.4333	46.2833	48.6333	33.75	58.4	210.183	118.967	142.567	159.133	421.8	157.6	467.526	176.06	214.162	239.775	110.267	226.099	739.456	401.755	374.548	476.683	347.65	191.955
AppNL-G-F	6	5.33333	6.66667	2.33333	8	8	4.33333	10	4.33333	3	3	5	1	129.383	144.95	19.6667	47.0833	47.0167	23.3833	33.7	22.75	15.9333	9.08333	15.0167	4.96667	532.365	380.582	129.202	367.854	308.122	187.959	340.511	212.917	139.635	143.078	194.53	71.6595
AppNL-G-F	6	4	6.66667	3	5.33333	3.66667	0.333333	7.33333	6.33333	3.66667	1	4	0.666667	72.7667	36.7	18.75	15.75	9.1	3.38333	36.1167	23.7333	10.2833	6.78333	12.4667	4.73333	276.749	255.976	130.448	165.463	115.499	47.5334	267.911	208.473	129.112	75.1609	140.255	50.3405
AppNL-G-F	6	4.33333	4.33333	4	7.66667	1.66667	0.666667	12.6667	8.33333	7.66667	5	1	3.66667	61.7667	53.6833	22.2167	33.5667	10.3167	7.7	60.05	36.5167	30.6	28.8	7.85	18.8333	295.787	293.035	146.557	215.306	69.7267	62.5496	425.052	293.222	239.35	213.397	65.1848	169.812
AppNL-G-F	6	6.66667	3.66667	7	0.666667	6.66667	4	2.33333	6.66667	3.33333	4.33333	1.66667	2.66667	115.417	65.0333	49.4167	5.58333	32.0333	16.0167	10.3167	22.3833	13.3167	14.9833	6.88333	8.23333	381.879	279.092	345.378	49.0819	232.512	149.791	102.494	213.023	179.704	180.49	71.9715	110.698
Control	6	7.66667	2	3.66667	2.33333	0.666667	4.33333	5	3.33333	6	1	0	2.33333	105.7	22.4333	32.3833	15	10.5667	23.6333	37.4167	12.8667	28.8333	8.88333	8.05	12.85	416.006	109.192	173.901	120.71	68.2307	180.207	223.333	114.618	221.022	71.846	46.5171	122.502
Control	6	10.6667	9	15.3333	1	7.33333	11	8.33333	12.6667	5	11	3.33333	6.33333	135.3	81.5833	144.417	33.1333	66.5	108	48.4	93.2167	36.3167	92.1	32.7167	35.1	535.303	410.252	640.747	175.619	413.465	651.697	309.324	593.742	217.692	618.398	226.034	252.237
Control	6	4.66667	3.33333	3.66667	13.3333	4	4.33333	7.66667	3.33333	5.33333	2.33333	2.66667	5.66667	52.5667	24.3333	32.9833	51.2167	19.95	21.4333	32.0667	18.6333	29.15	18.05	23.1	33.4	297.811	178.272	213.796	534.63	184.739	182.738	273.771	167.972	298.583	171.784	177.906	313.66
Control	6	6.33333	1.66667	3.33333	2.66667	2.66667	3.66667	8.33333	2.33333	3.66667	4	4.66667	1.33333	91.65	46.1333	36.8833	21	17.7667	15.3333	39.2667	8.85	20.7667	18.1167	16.7	7.68333	398.204	177.707	205.902	147.47	150.667	157.017	297.952	86.4162	133.916	171.897	153.799	86.2396
Control	6	4.66667	1.66667	3.33333	3.33333	1.66667	0.333333	7.66667	7.33333	3.66667	8	3.33333	5.33333	96.3667	18.15	25	28.45	15.35	8.91667	31.9167	21.3667	12.4333	29.15	11.9833	17.2167	256.19	95.192	186.01	134.056	92.3485	54.1405	213.589	232.603	112.363	240.704	106.712	174.522
Control	6	8	3.66667	3	3	2.66667	1.33333	7.33333	6.33333	6.33333	4.33333	2.33333	0	64.7	34.2667	25.75	19.2667	15.8	14.5167	22.65	18.15	26.35	20.45	14.55	10.2167	519.687	209.133	201.708	207.218	131.591	103.001	240.047	195.122	262.641	217.463	146.869	55.4887
Control	6	5.66667	4.66667	1.66667	2.33333	0.333333	0.333333	5	2	1.66667	4.66667	3.66667	0.666667	56.3	32.6333	14.65	14.1667	5.63333	4.91667	19.35	9.95	11.85	18.4833	17.9833	4.98333	324.2	238.535	118.685	107.389	51.6532	47.7761	201.071	94.5089	127.472	187.245	157.725	48.8714
Control	6	6.66667	2.33333	8.66667	2.33333	3	6.66667	3.33333	11	6.33333	3.66667	4	4	68.9333	23.95	35.0667	19.9	14.8167	36.0167	21.7833	35.7833	20.9833	18.5167	16.7833	17.5833	566.285	181.052	312.193	137.729	128.943	327.262	159.214	369.284	211.19	182.387	158.197	177.169
AppNL-G-F	6	16.3333	11.6667	5	1.66667	8	7	6.33333	5	6	6.33333	2.66667	2.33333	117.167	75.8833	37.7667	17.35	41.5	25.3167	31.6	26.95	27.0833	26.6167	11.1333	19.9	769.998	653.977	294.722	123.76	374.337	264.097	255.626	215.154	213.046	270.268	124.481	205.266
AppNL-G-F	6	3.33333	2	2	12.6667	3.66667	1.66667	10	2.66667	4.33333	8.33333	5.33333	3.66667	45.1333	47.4833	17.7667	77.8333	19.7167	9.03333	80.1833	14.5167	15	34.95	23.8167	18.7833	253.185	232.237	99.3505	588.561	172.99	95.6634	471.101	115.483	159.322	298.577	195.313	151.475
AppNL-G-F	6	5.66667	4.33333	3	4.33333	2.66667	3	3.66667	6	8.33333	11.3333	6.66667	3.66667	62.3333	32.9667	18.2333	18.2833	14.2167	12.7667	20.3167	24.2667	26.4333	34.5833	20.5667	12.4833	365.867	223.059	124.69	166.348	123.56	124.021	153.808	224.071	263.409	360.784	256.582	164.283
AppNL-G-F	6	9	6.33333	3.66667	3.66667	2.33333	6.33333	7.33333	2.66667	3.33333	1	3.33333	0.666667	69.7667	71.0667	34.95	27.4833	22.7167	26.9167	39.8667	17.45	13.9667	7.83333	14.0167	9.36667	431.94	371.401	251.987	195.073	133.3	200.457	299.729	120.123	118.274	55.2819	119.471	61.8777
AppNL-G-F	6	6.33333	7	8.66667	6.33333	5.33333	7	6	5.66667	7	6.66667	6	2.66667	138.383	54.3833	59.65	34.7333	22.75	26.2333	29.9333	18.8167	30.0667	20.3333	21.05	13.0167	566.946	358.965	414.834	251.357	190.44	231.867	219.516	192.774	252.021	211.072	196.995	127.896
Control	6	0.666667	2.33333	4.66667	11.3333	1.66667	8.33333	2.66667	3	5	4	4	4.33333	25.9167	28.0333	43.2333	69.6667	21.8667	58.2833	21.9667	25.2167	32.0167	25.3167	18.8	21.3833	82.5671	132.448	277.594	566.984	152.138	504.493	119.473	138.021	211.727	176.601	169.259	175.675
Control	6	6	6.33333	8	6	3.33333	2	8.66667	6.66667	5.66667	3.66667	7	3.66667	74.5333	59.55	37.6	26.5667	17.1	11.45	34.2167	21.4167	20.85	15.0833	26.75	16.5167	330.091	318.086	279.267	224.31	148.575	103.31	291.673	212.044	209.753	138.187	258.139	146.003
Control	6	3.66667	5.66667	8.66667	3	2	4	3	4.33333	1.66667	1.66667	3.33333	6.66667	57.5833	81.5667	44.2167	22.0833	14.1167	22.7	17.7833	19.7833	11.6667	11.2167	12.0333	19.65	310.667	462.338	396.267	176.345	132.088	192.447	140.201	167.954	83.3112	95.4167	138.11	223.023
Control	6	2.33333	4.33333	2.33333	0.333333	2.66667	0.666667	15.3333	6.33333	2.33333	1.66667	4.66667	2.66667	79.3667	64.1667	24.65	11.0167	22.4167	12.9833	107.417	44.8667	21.45	22.65	22.25	18.4667	195.042	190.841	170.115	58.204	164.947	76.793	677.959	273.375	170.3	113.545	162.604	124.853
Control	6	12.3333	3	4	4.33333	3.33333	0.666667	6	6	5.33333	5.33333	3.66667	2.33333	123.883	33.1333	25.0167	21.7833	19.2667	6.51667	31.8667	29.8	17.7333	20	14.5333	9.43333	704.762	161.598	167.496	143.6	154.365	59.9523	197.593	254.928	208.277	177.091	130.983	104.617

## Sheet: Figure 6F
		Strategy use count (daily sum)
		1					2					3					4					5					6					9					10					11					12
Genotype	Age	Random	Perimeter	Serial	Spatial	Confirmatory	Random	Perimeter	Serial	Spatial	Confirmatory	Random	Perimeter	Serial	Spatial	Confirmatory	Random	Perimeter	Serial	Spatial	Confirmatory	Random	Perimeter	Serial	Spatial	Confirmatory	Random	Perimeter	Serial	Spatial	Confirmatory	Random	Perimeter	Serial	Spatial	Confirmatory	Random	Perimeter	Serial	Spatial	Confirmatory	Random	Perimeter	Serial	Spatial	Confirmatory	Random	Perimeter	Serial
AppNL-G-F	6	3	0	0	0	0	2	0	1	0	0	3	0	0	0	0	2	1	0	0	0	1	1	0	1	0	2	0	0	1	0	1	1	0	0	1	1	0	0	1	1	0	1	0	2	0	0	1	1
AppNL-G-F	6	1	0	2	0	0	2	0	0	1	0	2	0	0	1	0	1	1	1	0	0	2	1	0	0	0	0	2	0	1	0	1	1	1	0	0	2	0	0	0	1	1	1	0	1	0	2	1	0
AppNL-G-F	6	2	0	1	0	0	1	1	0	0	1	2	0	1	0	0	3	0	0	0	0	1	0	1	1	0	2	0	0	1	0	3	0	0	0	0	1	2	0	0	0	2	0	0	0	1	2	0	0
AppNL-G-F	6	3	0	0	0	0	2	0	0	1	0	2	0	1	0	0	0	2	1	0	0	0	1	1	0	1	0	1	1	0	1	0	1	2	0	0	1	0	1	1	0	1	0	0	1	1	1	0	2
Control	6	1	0	1	0	1	1	0	1	1	0	3	0	0	0	0	2	0	0	0	1	2	0	0	0	1	2	0	1	0	0	3	0	0	0	0	2	0	0	0	1	1	1	0	0	1	1	0	0
Control	6	3	0	0	0	0	2	1	0	0	0	0	0	1	2	0	2	0	0	1	0	2	0	1	0	0	0	0	2	1	0	0	0	2	0	1	1	0	0	1	1	0	0	0	2	1	1	1	1
Control	6	1	1	0	0	1	1	1	0	0	1	3	0	0	0	0	1	1	0	0	1	2	1	0	0	0	0	1	1	1	0	0	2	1	0	0	0	3	0	0	0	0	3	0	0	0	0	2	1
AppNL-G-F	6	0	3	0	0	0	0	1	2	0	0	0	0	1	2	0	0	1	1	1	0	1	0	1	1	0	0	2	1	0	0	1	1	0	0	1	0	2	0	0	1	0	3	0	0	0	0	0	3
AppNL-G-F	6	1	2	0	0	0	2	1	0	0	0	0	2	0	0	1	0	1	1	1	0	1	1	1	0	0	0	0	0	3	0	1	2	0	0	0	1	1	0	0	1	1	0	1	1	0	0	0	3
AppNL-G-F	6	3	0	0	0	0	0	1	1	1	0	1	0	1	1	0	1	2	0	0	0	1	0	2	0	0	1	0	0	2	0	0	1	1	1	0	1	1	1	0	0	0	3	0	0	0	0	3	0
AppNL-G-F	6	0	0	1	0	2	1	1	1	0	0	2	1	0	0	0	3	0	0	0	0	1	2	0	0	0	1	2	0	0	0	1	1	0	0	1	0	1	2	0	0	0	2	1	0	0	0	1	2
Control	6	1	1	1	0	0	2	0	0	1	0	0	2	1	0	0	2	1	0	0	0	1	1	1	0	0	1	1	1	0	0	1	2	0	0	0	0	2	0	1	0	2	0	1	0	0	1	0	2
Control	6	1	0	0	1	1	0	2	1	0	0	1	0	1	1	0	3	0	0	0	0	1	0	1	1	0	1	0	1	1	0	1	1	1	0	0	1	1	0	1	0	2	0	0	0	1	0	1	1
Control	6	2	1	0	0	0	2	0	1	0	0	2	0	0	0	1	1	0	1	1	0	0	0	1	2	0	0	2	1	0	0	0	3	0	0	0	0	1	1	1	0	1	2	0	0	0	1	2	0
Control	6	2	1	0	0	0	2	1	0	0	0	1	0	1	1	0	1	0	0	2	0	0	0	0	3	0	1	0	0	2	0	2	1	0	0	0	2	0	0	0	1	0	0	2	1	0	1	0	0
Control	6	2	1	0	0	0	1	0	1	1	0	1	0	1	1	0	1	0	1	0	1	2	0	1	0	0	0	1	2	0	0	2	0	1	0	0	1	1	1	0	0	0	1	1	1	0	1	0	1
Control	6	1	1	0	1	0	0	2	0	1	0	1	1	1	0	0	0	0	2	0	1	1	1	1	0	0	1	0	0	2	0	1	1	0	1	0	0	2	1	0	0	1	0	1	0	1	0	0	1
Control	6	2	1	0	0	0	0	0	1	2	0	0	0	2	0	1	1	0	1	1	0	0	1	2	0	0	1	1	0	0	1	1	1	1	0	0	0	1	0	1	1	0	1	0	2	0	0	0	1
Control	6	1	2	0	0	0	0	1	2	0	0	2	0	0	1	0	1	0	1	0	1	0	0	2	0	1	0	2	0	1	0	1	0	1	0	1	2	0	0	1	0	0	0	0	1	2	0	0	0
AppNL-G-F	6	1	1	0	1	0	1	2	0	0	0	1	0	0	1	1	2	0	0	1	0	1	2	0	0	0	0	1	1	1	0	0	3	0	0	0	0	2	1	0	0	1	0	1	1	0	0	1	2
AppNL-G-F	6	1	0	0	1	1	1	2	0	0	0	1	0	1	1	0	0	3	0	0	0	0	1	1	1	0	0	0	1	2	0	1	2	0	0	0	0	3	0	0	0	0	2	0	1	0	0	1	0
AppNL-G-F	6	1	1	0	1	0	0	2	0	0	1	1	1	0	1	0	0	3	0	0	0	1	0	1	1	0	0	0	1	2	0	0	2	0	0	1	1	2	0	0	0	1	2	0	0	0	1	1	1
AppNL-G-F	6	0	2	0	0	1	1	1	1	0	0	0	2	1	0	0	1	0	1	1	0	1	2	0	0	0	0	1	1	0	1	0	0	2	0	1	0	2	1	0	0	0	2	1	0	0	1	1	1
Control	6	3	0	0	0	0	0	1	2	0	0	0	2	1	0	0	1	0	1	1	0	0	0	2	1	0	0	1	0	1	1	0	2	0	1	0	2	0	0	1	0	2	0	0	0	1	1	0	1
Control	6	0	3	0	0	0	0	3	0	0	0	0	0	0	0	3	1	1	1	0	0	1	2	0	0	0	0	1	0	0	2	0	2	0	0	1	1	0	0	0	2	1	1	1	0	0	0	0	0
Control	6	2	0	0	1	0	1	1	0	1	0	2	0	1	0	0	2	1	0	0	0	2	0	0	0	1	1	0	1	0	1	3	0	0	0	0	1	0	1	1	0	3	0	0	0	0	1	0	0
Control	6	0	2	1	0	0	0	1	2	0	0	1	1	1	0	0	2	1	0	0	0	0	1	2	0	0	0	2	0	1	0	0	3	0	0	0	0	0	0	2	1	0	1	1	1	0	1	1	0
Control	6	0	2	1	0	0	2	0	1	0	0	2	0	1	0	0	1	0	0	2	0	2	0	0	1	0	1	0	0	2	0	0	3	0	0	0	1	1	0	0	1	0	1	2	0	0	0	2	1
Control	6	1	0	2	0	0	1	0	0	2	0	1	1	1	0	0	1	1	1	0	0	0	1	0	2	0	1	0	0	2	0	1	1	0	0	1	1	1	1	0	0	0	0	1	0	2	0	0	0
Control	6	1	1	1	0	0	1	0	1	0	1	1	0	1	1	0	0	1	0	2	0	0	0	1	2	0	0	0	0	3	0	0	0	0	0	3	0	0	0	2	1	1	0	1	0	1	0	1	1
Control	6	3	0	0	0	0	1	0	1	1	0	2	1	0	0	0	1	1	1	0	0	1	0	0	2	0	1	1	0	1	0	1	0	0	2	0	1	1	0	0	1	2	0	1	0	0	1	0	0
AppNL-G-F	6	1	2	0	0	0	2	0	0	0	1	0	2	0	1	0	1	0	2	0	0	0	2	0	0	1	1	1	0	0	1	1	0	1	0	1	0	1	0	0	2	1	1	1	0	0	0	1	1
AppNL-G-F	6	1	1	0	1	0	1	1	0	1	0	1	0	1	1	0	1	2	0	0	0	1	1	0	1	0	1	0	0	2	0	1	1	0	1	0	1	1	1	0	0	0	2	0	0	1	0	2	0
AppNL-G-F	6	1	0	0	1	1	1	0	2	0	0	0	1	1	1	0	0	2	0	1	0	0	1	1	1	0	2	0	0	1	0	0	2	1	0	0	1	1	1	0	0	1	1	0	1	0	1	2	0
AppNL-G-F	6	1	2	0	0	0	2	0	0	1	0	0	1	0	2	0	3	0	0	0	0	1	0	1	1	0	0	1	1	1	0	1	1	1	0	0	0	1	1	1	0	0	1	2	0	0	0	0	1
AppNL-G-F	6	3	0	0	0	0	2	1	0	0	0	1	2	0	0	0	1	2	0	0	0	0	3	0	0	0	1	2	0	0	0	2	0	0	1	0	1	1	0	1	0	0	2	1	0	0	0	2	1
Control	6	0	0	1	2	0	1	0	1	1	0	0	2	0	1	0	2	1	0	0	0	1	0	0	1	1	1	2	0	0	0	0	0	0	2	1	0	1	2	0	0	0	2	0	1	0	1	0	1
Control	6	0	1	1	1	0	1	2	0	0	0	0	2	0	1	0	0	1	1	1	0	0	1	0	2	0	0	0	2	1	0	1	2	0	0	0	1	2	0	0	0	0	1	0	1	1	0	1	2
Control	6	1	1	1	0	0	2	1	0	0	0	2	0	1	0	0	1	1	1	0	0	1	0	2	0	0	0	2	0	1	0	1	0	2	0	0	0	2	1	0	0	0	1	1	1	0	0	1	2
Control	6	1	1	0	1	0	1	0	1	0	1	1	0	0	1	1	0	0	1	2	0	2	0	1	0	0	0	0	1	2	0	2	0	0	0	1	1	1	0	0	1	1	0	0	0	2	0	0	0
Control	6	2	1	0	0	0	1	1	0	1	0	2	0	1	0	0	1	0	2	0	0	1	1	1	0	0	0	0	1	2	0	2	1	0	0	0	3	0	0	0	0	1	1	0	0	1	0	2	0
[truncated: 12 more columns]

## Sheet: Figure 6GH
		Time spent around hole
		Figure 6F (Probe test 1)												Figure 6G (Probe test 2)
Genotype	Age	-150	-120	-90	-60	-30	0	30	60	90	120	150	180	-150	-120	-90	-60	-30	0	30	60	90	120	150	180
AppNL-G-F	6	0.55	1.65	1.15	3.2	14.9	4.2	10.05	11.4	4.65	1.9	1.7	11.45	10.85	12.3	5.6	6.05	6.4	6.1	6.8	7.45	6.95	5.75	10	6.5
AppNL-G-F	6	7	5.25	6.65	2.8	7.95	16.05	15.55	9.5	5.7	3.25	8.55	4.4	7.05	3.7	10.55	8.25	8.65	7.3	6.75	8.2	13.2	11.4	10.05	7.8
AppNL-G-F	6	3.55	7.1	1.4	0	4.6	11.1	5.65	1.2	8.6	5.8	7.7	8.55	9.2	11	9.95	4.85	3.95	17.4	7.9	5.95	13.65	7.5	4.5	7.85
AppNL-G-F	6	6.95	9.2	13.25	7.75	8.65	9.4	6.55	7	9.95	8.6	8.95	8.9	4.75	3.65	11.05	6.1	5.85	12.6	20.7	16.35	6.15	7.9	5.5	8.25
Control	6	7.45	8.05	6.6	8	6.6	14.3	7.25	7.35	2.95	7.1	11.85	1.35	6.05	7.5	1.7	6	2.1	19.6	8.6	1.2	5.45	3.2	4.45	6.7
Control	6	12.6	16.25	14.9	5.3	4.7	12.2	5.55	3.2	9.7	4.05	0	3.5	8.75	2.1	7.6	6.1	4.05	12.25	5.4	5.8	3	1.2	3.8	9.45
Control	6	5.95	10.95	11.8	5.7	5	7.5	5.6	14.85	7.3	9.4	6.6	9.55	10.15	7	5.85	3.9	8.1	11.9	16	12.3	4.05	4.7	6	7.95
AppNL-G-F	6	2.75	23.3	3.55	3.65	0	7.85	25.5	8.3	9.35	4.95	4.2	8.3	6.9	4.05	3	7.85	9.1	4.8	25.45	7.65	4.9	10.15	3.7	6.25
AppNL-G-F	6	9.45	8.1	2.05	2.35	1.55	28.5	11.05	6.45	9.75	4.55	7.8	0	14.25	18.6	4.8	11.05	8.5	12.2	2.6	2.7	5.85	2.6	11.1	9.85
AppNL-G-F	6	12.1	8.15	5.15	3.45	1.9	13.55	6	3.4	1.5	8.15	11.35	3.45	6.15	5.9	6.35	5.9	5.65	8.05	10.6	9.25	9.05	8.75	10.1	6.85
AppNL-G-F	6	3.15	8.7	3.75	3.55	4.7	11.85	8.6	8.8	10.3	9.45	9.85	2.95	8.6	7.1	11.05	3.7	8.6	4.2	7.35	5.95	5.75	7.95	7.55	17
Control	6	14.45	4.25	4.15	14.15	0	13	16.1	15.3	7	3.5	5	6.35	28.4	8.55	4.6	5.15	3.35	24.05	14.1	6.35	8.45	3.3	3.15	4.05
Control	6	13.05	8.75	4	1.55	6.05	25.6	15.35	5.75	0.95	3.5	0	3.65	15.85	4.7	6.55	6.15	3.1	15.2	7.75	9.7	6.8	4.4	4.8	10
Control	6	8.55	0	9.9	4.4	7.6	20.8	21.85	23.55	4.95	0	0	7.75	9.35	7.3	5.05	4.1	7.2	17.8	8.6	8.55	4.45	5.25	8.95	3.55
Control	6	22.5	11.95	0.5	9.05	1.65	11.1	7.5	4.35	6.7	7	2.9	5.4	12.85	9.5	4.2	4.15	0	11.5	9.7	3.75	4.1	6.35	6.1	9
Control	6	19.75	10.4	8.65	5.65	14.7	24.3	0	6.7	5.75	10.25	2.35	10.6	12.25	4.6	12.25	10.85	14.55	36.5	0.7	14.2	0.35	5.75	3.3	5.95
Control	6	1.45	2.9	2.85	1.55	6.25	9.9	32.85	14.8	6.9	5.45	1.4	4.7	5.8	4.55	11.05	3.95	14.35	12.35	28.15	12.3	4.05	2.8	3.7	3.3
Control	6	7.15	8.7	6.55	9.9	5.3	16	7.1	5.85	0.75	4.65	4.65	7	8.15	7.1	4.95	4.2	17.7	14.35	32.85	8.6	8.8	3.45	1.5	2.8
Control	6	5.65	1.45	7	0	11.25	18.75	10.4	14.25	15.7	0	0.2	9.15	1.1	6	13.4	4.8	5.7	10.55	15.8	17.45	3.45	3.9	4.2	9.45
AppNL-G-F	6	14	3.35	3.8	3.65	2.4	13.4	12.3	8.7	6.2	4.3	2.7	17.7	11.7	5.35	6.3	1.7	4.55	23.75	3.9	3.1	3.65	5.55	3.25	2.1
AppNL-G-F	6	5.85	2.65	3.2	4.6	2.85	21.8	15.25	7.05	10.75	4.05	3.85	7	4.9	4.75	4.65	8.8	6.15	20.55	16.35	18.75	8.15	8	3.3	4.1
AppNL-G-F	6	5.5	6.65	6.25	9.65	4.55	17	19.9	5.1	6.5	6.15	5	9.55	7.95	8.75	8	5.5	7	14.55	11.45	6.35	6.9	2.15	14.75	2.05
AppNL-G-F	6	12.95	3.9	3	3.05	8.6	14.55	8.35	14.45	10	3.8	1.3	3.75	2.2	4.15	2.65	9.7	20.3	5.6	18.5	5.5	7.8	2.3	10.3	11.8
Control	6	6.45	2.7	4.9	10	3.2	28.45	17.5	5.35	10.45	2.4	0.9	3.25	0.65	0	0.8	6.6	5.8	50.05	13.7	6.25	2.7	4.5	2.9	21
Control	6	3.2	2.05	0	1.6	0.65	5.75	47.55	8.55	9.75	0.85	2.55	3.7	7.55	6.95	5.2	6.3	9.45	12.65	18.65	7.95	0.2	0.85	1.5	4.3
Control	6	3.45	6.25	8.15	5.9	5.5	10.05	29.8	7.55	13.35	9	7.25	3.35	4.95	2.6	8.55	6.15	6.15	13.55	18.85	5.65	6.55	2.8	4.8	7
Control	6	7.7	1.4	4.05	15.7	2.25	11.4	27.6	23.25	13.2	5.1	4.9	3.7	2.8	2.55	4.45	4.6	2.45	6.35	8.3	11	13.4	16.65	6.85	1.45
Control	6	4	8.35	5.8	4.35	5.65	0	14.7	4.5	27.55	20.6	8.7	6.6	4.45	2.95	3.6	2.5	21.25	27.65	12.6	10.65	6.7	4.05	4.7	7.7
Control	6	5.85	4.1	8.25	5.3	2.75	23.3	30.75	9.35	6.55	2.5	6.1	5.3	7.45	6.55	5.65	1.65	2.95	20.75	9.05	4.8	5.2	2.9	3.7	14.95
Control	6	22.45	4.2	3.5	6.05	6.4	40.8	2.15	0.75	3.25	0.9	1.9	10.55	25.35	3.95	3.2	4.7	2.3	37.65	9.85	6.3	3.4	1.15	3.1	14.6
Control	6	20.4	13.3	5.7	7.75	5.45	19.8	4.85	4.25	3.3	3.75	2.05	3.2	10.45	9.45	11.1	8.35	4.05	23.05	8.05	4.45	3.95	2	3.3	10.9
AppNL-G-F	6	2.7	4.8	37.2	7.55	3.75	4	0	3.1	4.85	10.4	5.7	11.6	9.3	5.8	7.3	6.05	5.2	5.9	7.25	7.9	8.55	6.6	7.7	5.3
AppNL-G-F	6	24.15	2.4	4.5	5.8	5.5	13.55	5.75	8.25	13.35	8.25	2.5	7.85	17.35	9.45	8.15	7.6	15.35	19	12.85	7.35	6.85	0	0	0
AppNL-G-F	6	12.7	7.5	8.9	1.55	1.3	9.85	9.65	11	14.2	12.65	3.5	1.2	3.6	10.75	7.75	11.55	10.5	5.9	7.15	6.9	1.8	9.6	7.25	7.8
AppNL-G-F	6	13.4	9.35	8.45	1.35	1.85	17.95	13.85	14.1	5.5	4.5	0	1.6	8.85	7	17.05	9.1	11.75	14.55	10.75	3.85	5.45	4.7	5.8	6.15
AppNL-G-F	6	10.25	4	9.15	5.25	7.85	8.5	4.9	5.9	11.4	11.15	5.75	9.4	7.9	6.2	14	11.4	5.75	11.5	7.7	6.6	5	9.5	9.3	5.7
Control	6	6.95	4.3	0.25	3.3	9.8	8.45	9.95	12.55	8.6	9.5	15.55	5.5	6.15	3.75	0.4	3.4	5.95	17.1	26.65	5.4	3.05	5.65	12.2	5.05
Control	6	10.45	7.95	10.85	7.15	4	27.45	11.75	8.9	3.75	8.8	6.6	2.6	8.3	10.65	3.95	5.35	8.35	19.95	7.85	9.25	8.35	0.9	1.3	6
Control	6	9	3.6	6.3	2.55	5.65	12.15	14.85	18.45	4.9	4.1	5.15	5.65	8.5	6.15	6.4	7.85	4.75	16.2	10.95	8.9	6.6	4.45	3.6	8.35
Control	6	8.3	6.55	2.1	12.65	4.75	46.2	12.35	9.25	5.1	2.15	0	1.4	0	3.9	0	17.3	0	37.65	8.15	5.3	3.65	4.15	7.05	4.35
Control	6	15.7	9.1	6.3	14.2	4.65	22.25	13.4	9.1	5.4	0	0.65	3.95	6.95	9.85	6.15	9.15	2.3	29.75	9.3	5.45	8.7	5.5	9.85	14.95

## Sheet: Figure 6I
		Discrimination index (DI) Probe 2 vs. Probe 1
		Figure 6I	Figure 6—figure supplement 3C
Genotype	Age	2nd target hole	1st target hole
AppNL-G-F	6	0.407472	0.637601
AppNL-G-F	6	0.683091	0.356098
AppNL-G-F	6	0.369365	0.5
AppNL-G-F	6	0.372391	0.461787
Control	6
Control	6	0.783594	0.5
Control	6	0.781737	0.571178
Control	6	0.435866	0.595572
AppNL-G-F	6	0.430034	0.379909
AppNL-G-F	6	1	0.396104
AppNL-G-F	6	0.717361	0.431635
AppNL-G-F	6	0.800676	0.198113
Control	6	0.265552	0.511902
Control	6	0.81567	0.489533
Control	6	0.377348	0.531003
Control	6	0.744786	0.644643
Control	6	0.27204	0.5
Control	6	0.450355	0.592794
Control	6	0.163057	0.304025
Control	6	0.526005	0.376786
AppNL-G-F	6	0.0812379	0.569132
AppNL-G-F	6	0.383227	0.5
AppNL-G-F	6	0.224571	0.535902
AppNL-G-F	6	0.692815	0.216216
Control	6	0.786002	0.5
Control	6	0.747669	0.848694
Control	6	0.767624	0.680661
Control	6	0.393801	0.480072
Control	6	0.537561	1
Control	6	0.806956	0.568918
Control	6	0.599947	0.5
Control	6	0.750912	0.507463
Control	6	0.348852	0.541451
Control	6	0.760493	0.5
Control	6	0.627302	0.602941
Control	6	0.792219	0.5
AppNL-G-F	6	0.646341	0.855072
AppNL-G-F	6	0	0.640584
AppNL-G-F	6	0.888782	0.424101
AppNL-G-F	6	0.330552	0.52419
AppNL-G-F	6	0.801849	0.460443
Control	6	0.738948	0.5
